# Supplementary material for: Impact of a phone call with a medical student/general practitioner team on morbidity of chronic patients during the first French COVID-19 lockdown (COVIQuest): a cluster randomised trial
Source: PubMed Central journal article supplement — BMJ Open. 2022 Jul 28;12(7):e059464. doi: 10.1136/bmjopen-2021-059464 (PMC9340580; doi:10.1136/bmjopen-2021-059464), 2022-07-28
Supplement: bmjopen-2021-059464.draft_revisions.pdf [file bmjopen-2021-059464.draft_revisions.pdf]

# BMJ Open

BMJ Open is committed to open peer review. As part of this commitment we make the peer review history of every article we publish publicly available.

When an article is published we post the peer reviewers' comments and the authors' responses online. We also post the versions of the paper that were used during peer review. These are the versions that the peer review comments apply to.

The versions of the paper that follow are the versions that were submitted during the peer review process. They are not the versions of record or the final published versions. They should not be cited or distributed as the published version of this manuscript.

BMJ Open is an open access journal and the full, final, typeset and author-corrected version of record of the manuscript is available on our site with no access controls, subscription charges or pay-per-view fees (<http://bmjopen.bmj.com>).

If you have any questions on BMJ Open's open peer review process please email [info.bmjopen@bmj.com](mailto:info.bmjopen@bmj.com)

# BMJ Open

## Effectiveness of a general practitioner-initiated phone call to patients with a chronic cardiovascular disease or mental health disorder on hospitalisations during the first French covid-19 lockdown.

### COVIQuest: A cluster randomised trial

|                               |                                                                                                                                                                                                                                                                                                                                                                                                                                                                                                                                                                                                                                                                                                                                                                                                                                                                                                                                                                                                                                                                                                                                                                                                                                                                                                                                                                                                                                                                                                                                                  |
|-------------------------------|--------------------------------------------------------------------------------------------------------------------------------------------------------------------------------------------------------------------------------------------------------------------------------------------------------------------------------------------------------------------------------------------------------------------------------------------------------------------------------------------------------------------------------------------------------------------------------------------------------------------------------------------------------------------------------------------------------------------------------------------------------------------------------------------------------------------------------------------------------------------------------------------------------------------------------------------------------------------------------------------------------------------------------------------------------------------------------------------------------------------------------------------------------------------------------------------------------------------------------------------------------------------------------------------------------------------------------------------------------------------------------------------------------------------------------------------------------------------------------------------------------------------------------------------------|
| Journal:                      | <i>BMJ Open</i>                                                                                                                                                                                                                                                                                                                                                                                                                                                                                                                                                                                                                                                                                                                                                                                                                                                                                                                                                                                                                                                                                                                                                                                                                                                                                                                                                                                                                                                                                                                                  |
| Manuscript ID                 | bmjopen-2021-059464                                                                                                                                                                                                                                                                                                                                                                                                                                                                                                                                                                                                                                                                                                                                                                                                                                                                                                                                                                                                                                                                                                                                                                                                                                                                                                                                                                                                                                                                                                                              |
| Article Type:                 | Original research                                                                                                                                                                                                                                                                                                                                                                                                                                                                                                                                                                                                                                                                                                                                                                                                                                                                                                                                                                                                                                                                                                                                                                                                                                                                                                                                                                                                                                                                                                                                |
| Date Submitted by the Author: | 14-Dec-2021                                                                                                                                                                                                                                                                                                                                                                                                                                                                                                                                                                                                                                                                                                                                                                                                                                                                                                                                                                                                                                                                                                                                                                                                                                                                                                                                                                                                                                                                                                                                      |
| Complete List of Authors:     | Dibao-Dina, Clarisse ; University of Tours, Department of General Practice<br>Léger, Julie; CHRU Tours, CIC Tours<br>Ettori-Ajasse, Isabelle; University of Tours<br>BOIVIN, ESTELLE; CHRU Tours<br>Chambe, Juliette ; University of Strasbourg<br>Abou-Mrad-Fricquegnon, Karim; University of Tours<br>Sun, Sophie; Université Lyon 1 Faculté de Médecine Lyon-Est, CUMG<br>Jego, Maeva; Aix-Marseille-University<br>Motte, Baptiste; University of Lille<br>Chiron, Benoit; Bretagne Occidentale University<br>Sidorkiewicz, Stéphanie; Sorbonne Paris Cité, Paris Descartes University, General Practice Department, Paris, France, Hôpital Hôtel-Dieu<br>Khau, Cam-Anh; University of Paris Department of Medicine<br>Bouchez, Tiphany; University of Nice Sophia Antipolis<br>Ghali, Maria; University of Angers<br>Bruehl, Sébastien; Jean Monnet University Medical Faculty Jacques Lisfranc<br>LEBEAU, Jean-Pierre; Faculté de médecine de Tours, General Practice ; French National College of Teachers in General Practice, Research<br>Camus, Vincent; CHRU Tours<br>El-Hage, Wissam; CHRU Tours<br>Angoulvant, Denis; CHRU Tours<br>Caille, Agnès; INSERM U1415, CIC Tours<br>Guillon-Grammatico, Leslie; CHRU Tours<br>Laurent, Emeline; CHRU Tours<br>Saint-Lary, Olivier; Paris-Saclay University<br>Boussageon, Rémy; Université de Poitiers, Department of General Medicine<br>Pouchain, Denis; Tours University, General Practice; French National Teachers in General Practice, Research<br>Giraudeau, Bruno; INSERM U1246, ; |
| Keywords:                     | COVID-19, PRIMARY CARE, PREVENTIVE MEDICINE                                                                                                                                                                                                                                                                                                                                                                                                                                                                                                                                                                                                                                                                                                                                                                                                                                                                                                                                                                                                                                                                                                                                                                                                                                                                                                                                                                                                                                                                                                      |

1  
2  
3  
4  
5  
6  
7  
8  
9  
10  
11  
12  
13  
14  
15  
16  
17  
18  
19  
20  
21  
22  
23  
24  
25  
26  
27  
28  
29  
30  
31  
32  
33  
34  
35  
36  
37  
38  
39  
40  
41  
42  
43  
44  
45  
46  
47  
48  
49  
50  
51  
52  
53  
54  
55  
56  
57  
58  
59  
60

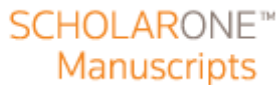

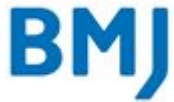

I, the Submitting Author has the right to grant and does grant on behalf of all authors of the Work (as defined in the below author licence), an exclusive licence and/or a non-exclusive licence for contributions from authors who are: i) UK Crown employees; ii) where BMJ has agreed a CC-BY licence shall apply, and/or iii) in accordance with the terms applicable for US Federal Government officers or employees acting as part of their official duties; on a worldwide, perpetual, irrevocable, royalty-free basis to BMJ Publishing Group Ltd ("BMJ") its licensees and where the relevant Journal is co-owned by BMJ to the co-owners of the Journal, to publish the Work in this journal and any other BMJ products and to exploit all rights, as set out in our [licence](#).

The Submitting Author accepts and understands that any supply made under these terms is made by BMJ to the Submitting Author unless you are acting as an employee on behalf of your employer or a postgraduate student of an affiliated institution which is paying any applicable article publishing charge ("APC") for Open Access articles. Where the Submitting Author wishes to make the Work available on an Open Access basis (and intends to pay the relevant APC), the terms of reuse of such Open Access shall be governed by a Creative Commons licence – details of these licences and which [Creative Commons](#) licence will apply to this Work are set out in our licence referred to above.

Other than as permitted in any relevant BMJ Author's Self Archiving Policies, I confirm this Work has not been accepted for publication elsewhere, is not being considered for publication elsewhere and does not duplicate material already published. I confirm all authors consent to publication of this Work and authorise the granting of this licence.

1  
2  
3 **Effectiveness of a general practitioner-initiated phone call to patients with a chronic**  
4 **cardiovascular disease or mental health disorder on hospitalisations during the first**  
5 **French covid-19 lockdown**  
6  
7  
8

9  
10  
11 **COVIQuest: A cluster randomised trial**  
12

13 Dibao-Dina Clarisse<sup>1,2</sup> (ORCID n° 0000-0002-1750-2846), Léger Julie<sup>3</sup>, Ettori-Ajasse  
14 Isabelle<sup>2,4</sup>, Boivin Estelle<sup>3</sup>, Chambe Juliette<sup>5</sup>, Abou-Mrad-Fricquegnon Karim<sup>2</sup>, Sun Sophie<sup>6</sup>,  
15 Jego Maeva<sup>7</sup>, Motte Baptiste<sup>8</sup>, Chiron Benoit<sup>9</sup>, Sidorkiewicz Stéphanie<sup>10</sup>, Khau Cam-Anh<sup>11</sup>,  
16 Bouchez Tiphonie<sup>12</sup>, Ghali Maria<sup>13</sup>, Bruel Sébastien<sup>14</sup>, Lebeau Jean-Pierre<sup>2,4</sup>, Camus Vincent<sup>15</sup>,  
17 El-Hage Wissam<sup>15</sup>, Angoulvant Denis<sup>16</sup>, Caille Agnès<sup>1,3</sup>, Grammatico-Guillon Leslie<sup>17</sup>,  
18 Laurent Emeline<sup>17</sup>, Saint-Lary Olivier<sup>18</sup>, Boussageon Rémy<sup>19</sup>, Pouchain Denis<sup>2</sup>, Giraudeau  
19 Bruno<sup>1,3</sup> and the COVIQuest group  
20  
21  
22  
23  
24  
25  
26  
27  
28

29  
30 <sup>1</sup> University of Tours, University of Nantes, INSERM, SPHERE U1246, Tours, France  
31

32  
33 <sup>2</sup> Department of General Practice, University of Tours, Tours, France  
34

35  
36 <sup>3</sup> INSERM CIC1415, CHRU of Tours, Tours, France  
37

38  
39 <sup>4</sup> Equipe Education, Ethique, Santé, EA7505, University of Tours, Tours, France  
40

41  
42 <sup>5</sup> Department of General Practice, University of Strasbourg, Strasbourg, France  
43

44  
45 <sup>6</sup> CUMG Lyon ; Research on Healthcare Performance (RESHAPE), INSERM U1290, Lyon  
46

47  
48 <sup>7</sup> Aix Marseille Univ, Department of general practice, CEReSS - Health Services Research and  
49 Quality of life Center, Marseille, France  
50

51  
52  
53 <sup>8</sup> Faculty of Medicine in Catholic Institute of Lille, Department of general practice , Lille ,  
54 France  
55

56  
57  
58 <sup>9</sup> Department of General Practice, University of Brest, Brest, France  
59  
60

1  
2  
3 10 Department of General Practice, Paris Descartes University, Paris, France  
4  
5

6 11 Department of General Practice, University Paris 13, Sorbonne Paris Cité, Bobigny, France  
7  
8

9 12 Department of General Practice, Côte d'Azur University, RETINES, HEALTHY, Nice,  
10  
11 France.  
12

13 13 Department of General Practice, Angers University, Angers, France  
14  
15

16  
17 14 Department of General Practice, Jacques Lisfranc Faculty of Medicine, RESHAPE, Saint-  
18  
19 Etienne-Lyon University, Saint-Etienne, France  
20  
21

22 15 UMR 1253, University of Tours, CHRU of Tours, Inserm, Tours, France  
23  
24

25 16 EA4245 T2i, University of Tours, CHRU of Tours, Tours, France  
26  
27

28 17 EpiDcliC, University of Tours, CHRU of Tours, Tours, France  
29  
30

31 18 Centre de Recherche en Épidémiologie et de Santé des Populations , University of Paris-Sud,  
32  
33 UVSQ, INSERM U1018, University Paris-Saclay , Villejuif , France  
34  
35

36 19 Department of General Practice, UMR 5558, LBBE CNRS, University Claude Bernard Lyon  
37  
38 1, Lyon, France.  
39  
40  
41  
42  
43  
44

45 Correspondance to: Clarisse Dibao-Dina  
46  
47 Département Universitaire de Médecine Générale  
48  
49 Faculté de Médecine – Université de Tours  
50  
51 10 Boulevard Tonnellé, B.P. 3223  
52  
53 37044 Tours cedex 1 - France  
54  
55  
56  
57 Tel: +33 2 47 36 60 19  
58  
59 Email: clarisse.dibao-dina@univ-tours.fr  
60

## **ABSTRACT**

**Objectives:** To evaluate whether a general practitioner (GP)-initiated phone call to patients with a chronic cardiovascular disease (CVD) or mental health disorder (MHD) during the covid-19 lockdown could reduce hospitalisations within 1 month.

**Design:** A cluster randomised controlled trial.

**Setting:** Primary care; Clusters were 149 GPs from 8 French regions.

**Participants:** Patients  $\geq 70$  years old with chronic CVD (COVIQuest\_CV subtrial) or  $\geq 18$  years old with an MHD (COVIQuest\_MH subtrial) were selected. A total 4724 patients completed the study.

**Interventions:** An immediate standardized GP-initiated phone call aiming to evaluate patients' need for urgent healthcare. The control group benefited from usual care.

**Primary and secondary outcome measures:** Hospital admission within 1 month after the phone call was the primary outcome. Secondary outcomes included mortality and proportion of patients called back by the GP within 1 month.

**Results:** In the COVIQuest\_CV subtrial, 1834 and 1510 patients were included in the intervention and control groups respectively. Overall, 65 (3.54%) patients were hospitalised in the intervention group versus 69 (4.57%) in the control group (odds ratio 0.82, 95% confidence interval [CI] 0.56 to 1.20; crude difference -0.77, 95% CI -2.28 to 0.74). In the intervention group, 670/1622 (41.3%) patients were recalled by their GP. In the COVIQuest\_MH subtrial, 832 and 548 patients were included in the intervention and control groups respectively. Overall, 27 (3.25%) patients were hospitalised in the intervention group versus 12 (2.19%) in the control group (odds ratio 1.52, 95% CI 0.82 to 2.81; crude difference 1.38, 95% CI 0.06 to 2.70). In the

1  
2  
3 intervention group, 188/621 (30.3%) patients were recalled by their GP. There was no  
4  
5 difference of mortality rate between intervention and control groups in both subtrials.  
6  
7

8 **Conclusions:** A GP-initiated phone call may have been associated with more hospitalisations  
9  
10 within 1 month for MHD patients, but results lack robustness.  
11  
12  
13  
14  
15

16 **Trial registration:** NCT04359875 (ClinicalTrials.gov)  
17  
18

19 **Manuscript word count:** (without tables/figures) : 3973  
20  
21  
22  
23  
24  
25  
26  
27  
28  
29  
30  
31  
32  
33  
34  
35  
36  
37  
38  
39  
40  
41  
42  
43  
44  
45  
46  
47  
48  
49  
50  
51  
52  
53  
54  
55  
56  
57  
58  
59  
60



## **ARTICLE SUMMARY : STRENGTHS AND LIMITATIONS OF THE STUDY**

COVIQuest was an opportunity to combine both optimising access to primary care and research by mobilising general practitioners and medical students during the first COVID-19 lockdown period.

COVIQuest mobilised 149 research-naïve general practitioners who included 4624 patients in a few weeks between the start of the COVID-19 lockdown on March 17, 2020 and the start of the trial on April 30, 2020, thus demonstrating the strong potential for responsiveness of primary care actors.

The COVIQuest protocol allowed all included patients to benefit from the intervention by randomising not the patients, but the order in which the intervention was allocated to the patients.

The start of COVIQuest a few days before the lockdown's end on May 11, 2020 and the short 1-month delay of the intervention between patients in the intervention and control groups may have decreased the effect of the intervention.

The significant number of missing data linked to the data collection method will be compensated by the subsequent recovery of data from the National Health Insurance.

## Introduction

The covid-19 pandemic grew exponentially in Europe since January 2020<sup>1-2</sup>. Given the fast-growing case fatality rate in Italy, lockdown measures were decided in several European countries to limit the spread of the virus. These lockdown measures were set in France on March 17, 2020, as the epidemic curve for the period February 23 to March 9, 2020 yielded the best fit for exponential growth as compared with Italy, Germany and Spain<sup>3</sup>. Lockdown measures limited people from urban travel including seeking healthcare because the government announced on March 23, 2020 that only travel for "urgent care or care that respond to a summons from a doctor" were allowed<sup>4</sup>.

Following this announcement, the number of consultations with general practitioners (GPs) was notably decreased in France<sup>5</sup>. Communication on lockdown and protection measures against the spread of the SARS-CoV-2 virus targeted more specifically patients with chronic diseases and over age 75 years, who were considered at increased risk of severe covid-19<sup>6</sup>. Furthermore, an exemption was granted to community pharmacies to deliver an extra month of usual prescriptions for patients with chronic diseases without the need to contact their GP<sup>7</sup>. As a consequence, even patients with regular follow-up for one or more chronic disease(s) stopped consulting/contacting their GP in massive numbers. Teleconsultations were generalized but were at the time scarcely used because of lack of such practice by the general population, especially for older people<sup>5</sup>. This decrease in consultations in general practice may constitute an underuse of care, leading to delayed diagnosis and treatment of serious diseases in the short and medium term but also decompensation of chronic diseases<sup>8</sup>. This underuse of care could lead to excess morbidity and mortality in this population, indirectly linked to the covid-19 epidemic<sup>5</sup>.

Two populations are particularly at risk of decompensation. Patients  $\geq 70$  years old with a chronic cardiovascular disease (CVD) are at risk of decompensation, with severe cardiovascular

1  
2  
3 events such as stroke, myocardial infarction, heart failure or death without a regular medical  
4 follow-up<sup>8</sup>. This follow-up is usually performed by the GP<sup>9</sup>. Underuse of care induced by strict  
5 lockdown measures may have led to ignoring symptoms possibly indicating a major  
6 cardiovascular event. Second, patients living with a chronic mental health disorder (MHD) may  
7 be particularly at risk of decompensation secondary to the lockdown measure, which could  
8 increase their anxiety and risk of suicide. The exemption granted to the pharmacist to deliver  
9 the patient's usual treatment for an extra month without consulting the GP may favour the abuse  
10 of drugs, especially psychotropic, hypnotics and substitute drugs. The situation could lead to  
11 drug dependence and then withdrawal syndromes at the end of the lockdown, increased risk of  
12 hospitalisations and death.

13  
14  
15  
16  
17  
18  
19  
20  
21  
22  
23  
24  
25  
26 In France, patients with a chronic CVD or MHD are regularly followed by the GP, and contact  
27 with their GP is traditionally according to the patient's initiative. On April 8, 2020, because of  
28 the underuse of care, the French government recommended that GPs directly contact their  
29 patients with chronic disease to prevent decompensation<sup>10</sup>. However, the average number of  
30 patients with a chronic disease regularly followed by their GP is approximately 150 per GP<sup>11</sup>,  
31 which questioned the feasibility of this recommendation. Furthermore, choosing which patients  
32 to contact first was ethically challenging.

33  
34  
35  
36  
37  
38  
39  
40  
41  
42  
43 The development of the COVIQuest project in this context solved the ethical dilemma of which  
44 patient to call first and increased the number of possible calls while meeting the research  
45 objective: to assess the impact of a GP-initiated phone call to patients with a CVD or MHD on  
46 hospital admissions within 1 month after the phone call.

## Methods

### *Study design*

The COVIQuest trial consisted of two simultaneous subtrials (although only one randomisation took place; see *Randomisation and masking* section): the COVIQuest\_CV for patients with a CVD and COVIQuest\_MH for patients with an MHD. Both subtrials were open-label, two-parallel group 1:1, cluster randomised trials with clusters defined as GPs.

Because each patient included in the trial had to benefit from the intervention, as recommended by the French government on April 8, 2020<sup>10</sup>, the COVIQuest study used a wait-list control design with GPs randomised to call their CVD patients first (group A) or their MHD patients first (group B). With such a procedure, each 8GP participated in the two subtrials: those allocated to the intervention group for the subtrial focusing on CVD patients actually formed the control group for the subtrial focusing on MHD patients and vice versa (Figure 1).

Figure 1. COVIQuest design

The timeline of each subtrial<sup>12</sup> is in Figure 2.

Figure 2: Timeline of the COVIQuest\_CV and COVIQuest\_MH sub-trials

### *Participants: GPs and patients*

Eligible GPs were volunteer GPs practising as training supervisors from 8 different administrative regions in France (see Appendix 1) who had medical trainees and a dedicated time to call patients.

1  
2  
3 CVD patients were  $\geq 70$  years old with a chronic CVD as referenced in the long-term illness  
4 list (*Affection longue durée* [ALD], i.e.. with ALD no. 1, 3, 5, 12, 13; details in Appendix 2)  
5  
6 and regularly followed by their GP (i.e., in the list of patients followed by a GP as referenced  
7  
8 in the French health insurance database). MHD patients were  $\geq 18$  years old with an MHD  
9  
10 referenced as no. 23 in the ALD. Patients with both a cardiovascular ALD and a mental health  
11  
12 ALD or for whom their GP considered their participation in the trial as inappropriate for any  
13  
14 reason were not contacted. All participants or their family members or legally authorised  
15  
16 representatives were provided with information about the trial, and oral informed consent was  
17  
18 obtained at the beginning of the phone call before recruitment.  
19  
20  
21  
22

### 23 24 ***Randomisation and masking***

25  
26  
27 Randomisation units were GPs. If several eligible GPs were working at the same practice, they  
28  
29 were all allocated to the same group. GPs were randomised all at once. The randomisation  
30  
31 sequence was centrally generated by a statistician not involved in the GP or patient recruitment,  
32  
33 who used permuted blocks of variable size. A stratified randomisation on regions was used to  
34  
35 allocate GPs in a 1:1 ratio to group A (CVD patients called first) or group B (MHD patients  
36  
37 called first). After screening their eligible patients (both CVD and MHD patients) for  
38  
39 recruitment (see *Procedures* section), GPs received the randomisation sequence from the  
40  
41 central trial-coordinating team, which ensured concealment of allocation.  
42  
43  
44

45  
46 There was no possible blinding in the present trial because of the nature of the intervention.  
47  
48

### 49 ***Interventions***

50  
51  
52 Interventions were the same in the two simultaneous subtrials. Patients recruited in the  
53  
54 intervention arm benefited from a GP-initiated phone call by the GP or his/her medical trainee  
55  
56 as a representative of the GP. This phone call was standardized with three questions: How are  
57  
58 you doing? (response on a Likert scale from 0, very bad to 10, very well). Would you have  
59  
60

1  
2  
3 made an appointment with your GP if there had not been covid-19 epidemic and lockdown?  
4  
5 (response Yes/No) Would you like an appointment with your doctor? (response Yes/No) (see  
6  
7 Appendix 3). In view of the answers to these three questions, the GP decided whether to propose  
8  
9 a consultation or teleconsultation to the patient, taking into account the patient's medical  
10  
11 background.  
12  
13

14  
15 Patients in the control group initially benefited from usual care. When they were called to report  
16  
17 the primary outcome within 1 month after the initiation of the trial (see *Outcomes* section), they  
18  
19 also benefited from the intervention because they were asked the same three questions as for  
20  
21 the intervention group, and once again were re-contacted by their GP if deemed necessary.  
22  
23 Therefore, the COVIQuest study was a wait-list trial.  
24  
25

### 26 27 ***Procedures (Figure 2)*** 28

29  
30 GPs were asked to identify eligible CVD and MHD patients and to alphabetically order them.  
31  
32 Then GPs were randomised all at once to group A or B. GPs allocated to group A had to call  
33  
34 their CVD patients first at the beginning of the trial and then call their MHD patients after 1  
35  
36 month at the same time they collected the primary outcome (see *Outcomes* section). For GPs  
37  
38 allocated to group B, MHD patients were called first, then CVD patients 1 month later. When  
39  
40 GPs were allocated to groups A and B, they were also randomly allocated to one of the 26  
41  
42 alphabet letters. They had to phone patients on the list, beginning with the letter to which they  
43  
44 had been allocated. One month later, all CVD and MHD patients were called to assess the  
45  
46 primary outcome (see *Outcomes* section). Again, both for CVD and MHD patients, the order  
47  
48 by which these patients were called was alphabetic, starting at the letter to which the GP had  
49  
50 been randomly allocated. During the same phone call, for GPs allocated to group A, the  
51  
52 intervention was also delivered to MHD patients; and for GPs allocated to group B, the  
53  
54 intervention was also delivered to CVD patients.  
55  
56  
57  
58  
59  
60

## ***Outcomes***

The primary outcome was the occurrence of at least one hospitalisation within 1 month after GP randomisation. It was patient self-reported and assessed by a phone call from the GP or his/her medical trainee to the patient 1 month after the practice had been randomised. Hospitalisation details (date, location, length and reason, if available) were collected. The primary outcome was the same for the two subtrials.

Secondary outcomes at 1 month were the proportion of patients for whom the practitioner had to call back after the medical trainee had phoned (in the intervention group only) and mortality (with cause of death) over the 1-month period after randomisation.

Secondary outcomes at 6 months were collected from electronic health records (national health insurance data; Système National des Données de Santé [SNDS]): mortality over the 6 months; number and date of GP consultations and teleconsultations; number and date of consultations with another specialist; number of prescriptions related to the chronic disease that were dispensed by the pharmacy; number, date and reason for hospitalisations; cardiovascular events for COVIQuest\_CV subtrial (MACE4: nonfatal stroke, nonfatal myocardial infarction, cardiovascular death and hospitalisation for heart failure); and psychotropic drug consumption for the COVIQuest\_MH subtrial. Because of a data collection time interval, these data are not collected yet and will be reported subsequently.

## ***Statistical analyses***

There were no data available to formulate hypotheses for the sample size. Therefore, all eligible GPs volunteering to participate were recruited (i.e., at least 200 GPs were expected to be recruited). However, considering that the mean number of eligible patients per GP was expected to be about 80 for CVD patients and 30 for MHD patients<sup>13</sup>, approximately 16,000 CVD and

1  
2  
3 6,000 MHD participants were possible. With such sample sizes, we expected to detect a  
4  
5 difference of 5% versus 3% of events with power of 90% for CVD patients and 78% for MHD  
6  
7 patients, considering a two-sided Type I error rate of 5%, a 0.5 coefficient of variation for  
8  
9 cluster size, and an intraclass correlation coefficient (ICC) of 0.03 (i.e., the median value  
10  
11 observed in Campbell et al.<sup>14</sup>).  
12  
13

14  
15 Statistical analyses were conducted by keeping all patients who agreed to be included in the  
16  
17 group to which their GP had been allocated to. For the primary outcome, missing data were  
18  
19 considered as no hospitalisation, whatever the study group. A multiple imputation strategy was  
20  
21 considered impossible because of the absence of participant baseline data (except for age and  
22  
23 sex). A sensitivity analysis was conducted for participants without a missing primary outcome  
24  
25 (completers analysis). Another sensitivity analysis was performed, adjusting on sex and age.  
26  
27 The level of statistical significance was set to 5%.  
28  
29

30  
31 For the primary outcome analysis, a marginal approach was used by fitting a logistic regression  
32  
33 model within a generalized estimating equation framework with a robust variance estimator and  
34  
35 considering a compound symmetry correlation structure. This model accounted for clustering  
36  
37 at the GP level. All analyses were adjusted on region (stratification variable). Clustering at the  
38  
39 practice level was not taken into account, which limited our models to two-level hierarchical  
40  
41 models with patients embeded in GPs only. A risk difference was also estimated by using an  
42  
43 identity link function. Of note, for MHD patients, the logistic model did not take into account  
44  
45 the stratification variable because of convergence problems. ICCs were estimated per group by  
46  
47 using the ANOVA estimator.  
48  
49  
50  
51

52  
53 For the secondary outcome analysis, the proportion of patients for whom the GP had to call  
54  
55 back after the medical trainee call (in the intervention group) was estimated. The confidence  
56  
57 interval was corrected to take into account clustering. For that, a corrected variance was used,  
58  
59  
60



1  
2  
3 taking into account the ICC estimate associated with the intervention group<sup>15</sup>. Mortality rates  
4  
5 were reported without any statistical analysis owing to the small number of events.  
6  
7

### 8 ***Ethics and dissemination***

9

10  
11 The study protocol was approved by the ethics committee of CPP Sud-Méditerranée 3, no.  
12  
13 2020.04.21 ter\_20.04.17.42325. The French committee for data handling (CNIL) approved the  
14  
15 study (no. 920185 dated 30 of April 2020). This trial was registered with ClinicalTrials.gov  
16  
17 (NCT04359875).  
18  
19

### 20 ***Patient and Public Involvement***

21

22  
23  
24 Unfortunately, patients and public could not be involved due to an extremely tight COVIQuest  
25  
26 timeframe.  
27  
28  
29  
30  
31  
32  
33  
34  
35  
36  
37  
38  
39  
40  
41  
42  
43  
44  
45  
46  
47  
48  
49  
50  
51  
52  
53  
54  
55  
56  
57  
58  
59  
60

## Results

### *Trial profiles*

Of 267 selected GPs across 8 different French areas, 149 from 125 practices identified 10,275 patients: 6873 CVD patients and 3402 MHD patients. A total of 3,344 CVD patients and 1,380 MHD patients were included (Figure 3).

Figure 3: Trial flow chart for the COVIQuest\_CV and COVIQuest\_MH subtrials

### *Physicians and patients baseline characteristics (Table 1)*

GPs were younger in group B than group A. They were more frequently practicing medicine in multidisciplinary healthcare centres (49.3% and 39.0% in group B and A) and/or territorial professional health communities (49.3% and 41.7%, respectively) and/or with the help of an advanced health nurse (24.7% and 16.7%, respectively).

Patients' baseline data from the COVIQuest\_CV and COVIQuest\_MH subtrials were comparable between the intervention and the control groups (Table 1).

Complete baseline data for GPs are in supplementary files (Appendix 4).

Table 1. Baseline general practitioners and patients characteristics

| Baseline characteristics of general practitioners (GPs) by group* |         |         |
|-------------------------------------------------------------------|---------|---------|
|                                                                   | Group A | Group B |
|                                                                   |         |         |

|                                                                                           | (n <sub>1</sub> =72)      | (n <sub>2</sub> =77) |
|-------------------------------------------------------------------------------------------|---------------------------|----------------------|
| <b>Mean (standard deviation); median</b>                                                  | 49.9 (11.9)               | 43.3 (10.3)          |
| <b>(interquartile range) age (years)</b>                                                  | 49.0 (38.0–60.5)          | 39.0 (35.0–53.0)     |
| <b>Sex: male</b>                                                                          | 32 (44.4)                 | 30 (39.0)            |
| <b>Baseline characteristics of CVD and MHD patients by group: intervention or control</b> |                           |                      |
|                                                                                           | <b>Intervention group</b> | <b>Control group</b> |
|                                                                                           | <b>(phone call)</b>       | <b>(n=1510)</b>      |
|                                                                                           | <b>(n=1834)</b>           |                      |
| CVD patients                                                                              |                           |                      |
| <b>Mean (standard deviation); median</b>                                                  | 79.9 (6.9)                | 79.8 (7.2)           |
| <b>(interquartile range) age (years)</b>                                                  | 80.0 (74.0–85.0)          | 80.0 (74.0–85.0)     |
| <b>Sex: male</b>                                                                          | 1056 (57.6)               | 878 (58.1)           |
| MHD patients                                                                              |                           |                      |
| <b>Mean (standard deviation); median</b>                                                  | 53.2 (14.2)               | 53.4 (16.1)          |
| <b>(interquartile range) age (years)</b>                                                  | 53.0 (44.0–63.0)          | 54.0 (41.0–64.5)     |
| <b>Sex: Male</b>                                                                          | 298 (35.8)                | 203 (37.0)           |

\*Group A (cardiovascular disease [CVD] patients called first); group B (mental health disorder [MHD] patients called first).

Values are numbers (percentages) unless stated otherwise.

### ***Results for CVD patients***

#### ***Timeline adherence***

1  
2  
3 In 80.4% of cases, the medical trainee initiated the intervention phone call as a representative  
4 of the GP. In the intervention group, the median time between the beginning of the trial on April  
5 30, 2020 and the intervention phone call was 12 days (interquartile range 5 to 15). Then, pooling  
6 the two groups, the median time between April 30, 2020 and date of outcome assessment was  
7 47 days (interquartile range 41 to 53). Results per group are in supplementary files (Appendix  
8 5, table 1).  
9  
10  
11  
12  
13  
14  
15

### 16 17 ***Information gathered by phone calls***

18  
19  
20 The proportion of patients who had a consultation with their physician since the beginning of  
21 the lockdown was 46.6% (n=851/1825) and 81.8% (n=1159/1417) in the intervention and  
22 control groups. The perceived health status was similar in the intervention and control groups,  
23 with a mean (SD) score on the 0-10 Likert scale of 7.4 (1.8) and 7.3 (1.9), respectively. At the  
24 end of the phone call, 33.4% (611/1828) and 20.5% (308/1500) of patients in the intervention  
25 and control groups wanted an appointment with their GP. Details on information gathered by  
26 the intervention phone call are in supplementary files (Appendix 5, tables 2, 3 and 4).  
27  
28  
29  
30  
31  
32  
33  
34  
35

### 36 37 ***Primary and secondary 1-month outcome results***

38  
39  
40 In the COVIQuest\_CV subtrial, missing information on the primary outcome was imputed for  
41 348 participants in the intervention group and 39 in the control group. Overall, 65 (3.54%)  
42 patients from the intervention group had a hospital admission within 1 month after  
43 randomisation versus 69 (4.57%) in the control group (odds ratio 0.82, 95% confidence interval  
44 (CI) 0.56 to 1.20; crude difference -0.77, 95% CI -2.28 to 0.74) (Table 2).  
45  
46  
47  
48  
49  
50  
51  
52  
53  
54  
55  
56  
57  
58  
59  
60

Table 2. COVIQuest\_CV subtrial comparison of hospitalisations within 1 month

|                            | Hospitalisations        |                         | OR (95%CI)*         | Crude difference      | ICC (95%CI)        |                   |
|----------------------------|-------------------------|-------------------------|---------------------|-----------------------|--------------------|-------------------|
|                            | n (%)                   |                         | p-value             | (95%CI)*              |                    |                   |
|                            | A – Intervention        | B – Control             |                     | p-value               | A – Intervention   | B – Control group |
|                            | group (phone call)      | group                   |                     |                       | group (phone call) |                   |
|                            | (n <sub>1</sub> = 1834) | (n <sub>2</sub> = 1510) |                     |                       |                    |                   |
| <b>Full dataset</b>        | 65 (3.54)               | 69 (4.57)               | 0.82 (0.56 to 1.20) | -0.77 (-2.28 to 0.74) | -0.004 (-0.011 to  | 0.012 (-0.017 to  |
|                            |                         |                         | 0.310               | 0.319                 | 0.009)             | 0.035}            |
| <b>Adjusted analysis**</b> |                         |                         | 0.82 (0.56 to 1.20) | -0.77 (-2.28 to 0.74) |                    |                   |
|                            |                         |                         | 0.308               | 0.315                 |                    |                   |
| <b>Completers***</b>       | 65/1486 (4.37)          | 69/1471 (4.69)          | 0.99 (0.68 to 1.43) | -0.06 (-1.66 to 1.54) | -0.003 (-0.011 to  | 0.011 (-0.002 to  |
|                            |                         |                         | 0.943               | 0.941                 | 0.014)             | 0.035}            |

\* Adjustment on region

1  
2  
3 \*\* Adjustment on region, age and sex  
4

5  
6 \*\*\* Missing data were considered as no hospitalisation  
7

8  
9 OR, odds ratio; 95% CI, 95% confidence interval; ICC, intraclass correlation coefficient  
10

11  
12  
13  
14  
15  
16  
17  
18  
19  
20  
21  
22  
23  
24  
25  
26  
27  
28  
29  
30  
31  
32  
33  
34  
35  
36  
37  
38  
39  
40  
41  
42  
43  
44  
45  
46

For peer review only

1  
2  
3 Among hospitalisations, 14 were for a cardiovascular cause in the intervention group versus 23  
4 in the control group. Details on causes of hospitalisations are in supplemental files (Appendix  
5 5, table 5). The number of deaths were 3/1523 (0.2%) in the intervention group and 0/1510 in  
6 the control group (no statistical test performed). Finally, in the intervention group, 670/1622  
7 (41.3%) patients were recalled by their GP after the trainee intervention phone call to adapt  
8 their care.  
9  
10  
11  
12  
13  
14  
15  
16  
17  
18  
19  
20  
21  
22  
23  
24  
25  
26  
27  
28  
29  
30  
31  
32  
33  
34  
35  
36  
37  
38  
39  
40  
41  
42  
43  
44  
45  
46  
47  
48  
49  
50  
51  
52  
53  
54  
55  
56  
57  
58  
59  
60

For peer review only

## ***COVIQuest\_MH subtrial results***

### ***Timeline adherence***

In 715/814 (87.8%) of cases, the intervention phone call was made by the medical trainee as a representative of the GP. The median time from the beginning of the trial to the intervention phone call in the intervention group was 7 days (interquartile range 5 to 14). The median time from April 30, 2020 to the first phone call in the control group (i.e., the outcome assessment phone call after a 1-month delay) was 49 days (interquartile range 42 to 56). Results per group are in supplementary files (Appendix 6, table 1).

### ***Information gathered by phone calls***

The proportion of patients who already had a consultation with their physician after the beginning of the lockdown was 48.0% (n=393/819) and 67.2% (367/546) in the intervention and control groups. The perceived health status was similar in the intervention and the control groups, with a median (SD) score on the 0-10 Likert scale at 1 month of 7.1 (2.2) and 7.1 (2.0), respectively. At the end of the phone call, 36.6% (302/826) and 29.1% (158/542) of patients in the intervention and control groups sought an appointment with their GP. Details on information gathered by the intervention phone call are in supplementary files (Appendix 6, tables 2, 3 and 4).

### ***Primary and secondary 1-month outcomes***

Missing information on the primary outcome was imputed for 282 participants in the intervention group and 48 in the control group. The primary outcome occurred in 27 (3.25%) and 12 (2.19%) patients in the intervention and control groups (odds ratio 1.52, 95% CI 0.82 to 2.81; crude difference 1.38 95% CI 0.06 to 2.70).



Table 3. COVIQuest\_MH subtrial comparison of hospitalisations within 1 month.

|                            | Hospitalisations                            |                                                                  | OR (*) (95%CI)               | Crude difference (*)         | ICC (95%CI)                |                                        |
|----------------------------|---------------------------------------------|------------------------------------------------------------------|------------------------------|------------------------------|----------------------------|----------------------------------------|
|                            | A – Control group<br>(n <sub>1</sub> = 548) | B – Intervention<br>group (phone call)<br>(n <sub>2</sub> = 832) | p-value                      | (95%CI)<br>p-value           | A – Control group          | B – Intervention<br>group (phone call) |
| <b>Full dataset</b>        | 12 (2.19)                                   | 27 (3.25)                                                        | 1.52 (0.82 to 2.81)<br>0.180 | 1.38 (0.06 to 2.70)<br>0.040 | 0.014 (-0.017 to<br>0.067) | 0.002 (-0.018 to<br>0.036)             |
| <b>Adjusted analysis**</b> |                                             |                                                                  | 1.52 (0.82 to 2.81)<br>0.179 | 1.38 (0.07 to 2.68)<br>0.038 |                            |                                        |
| <b>Completers***</b>       | 12/500 (2.40)                               | 27/550 (4.91)                                                    | 2.14 (1.15 to 3.99)<br>0.017 | 2.79 (0.80 to 4.78)<br>0.006 | 0.012 (-0.020 to<br>0.068) | 0.018 (-0.016 to<br>0.074)             |

\* Adjustment on region

1  
2  
3 \*\* Adjustment on region, age and sex  
4

5  
6 \*\*\* Missing data were considered as no hospitalisation  
7

8  
9 OR, odds ratio; 95% CI, 95% confidence interval; ICC, intraclass correlation coefficient  
10  
11  
12  
13  
14  
15  
16  
17  
18  
19  
20  
21  
22  
23  
24  
25  
26  
27  
28  
29  
30  
31  
32  
33  
34  
35  
36  
37  
38  
39  
40  
41  
42  
43  
44  
45  
46

For peer review only

1  
2  
3 Hospitalisations were for a mental health emergency (including suicide attempt): 8/26 (30.8%)  
4  
5 versus 4/13 (30.8%) in the intervention and control groups. Details on causes of hospitalisations  
6  
7 are in supplementary files (Appendix 6, table 5). The number of deaths was 2/570 (0.35%) in  
8  
9 and 0/548 in the intervention and control groups (no statistical test performed).  
10  
11  
12

13 Finally, in the intervention group, 188/621 (30.3%) patients were re-called by their GP after the  
14  
15 trainee's intervention phone call to adapt their care.  
16  
17  
18  
19  
20  
21  
22  
23  
24  
25  
26  
27  
28  
29  
30  
31  
32  
33  
34  
35  
36  
37  
38  
39  
40  
41  
42  
43  
44  
45  
46  
47  
48  
49  
50  
51  
52  
53  
54  
55  
56  
57  
58  
59  
60

For peer review only

## Discussion

For CVD patients, patients who were called immediately (intervention group) and those who were called at 1 month (control group) did not differ in number of hospitalisations within 1 month. For MHD patients, the intervention effect expressed as an odds ratio was not statistically significant, but the crude difference in hospitalisations revealed a modest but statistically significant higher rate of hospitalisations in the intervention than control group. This apparent discrepancy is probably due to the inability to consider the region stratification variable when estimating the odds ratio, which may have reduce the power of the statistical analysis.

These COVIQuest first results must be interpreted with caution. First, some randomised GPs did not screen any patients (119 for the COVIQuest\_CV subtrial and 122 for the COVIQuest\_MH subtrial). These empty clusters were discarded from all statistical analyses, which remains a limitation for data interpretation<sup>16</sup>. Other GPs screened control patients but finally did not include them, which led to 10 more empty clusters in the COVIQuest\_CV subtrial and 14 in the COVIQuest\_MH subtrial. Patients were included at day 0 in the intervention group and at month 1 in the control group. Reaching out to patients was more difficult at month 1 than at day 0, as medical trainees changed internship June 1, 2020 and the lockdown ended on May 11, 2020. Therefore, fewer control than intervention patients had been recruited, which led to a possible risk of selection bias occurring in both subtrials. Finally, patients from the intervention group who could not be reached at month 1 had missing data, which were considered absence of hospitalisation in the intervention group but could not be considered so in the control group. All these elements may have biased the intervention effect estimates, which is the main limitation of the trial. However, missing data will be completed by the *Système National des Données de Santé* (SNDS) data collection performed by the National Health Insurance (Caisse Nationale d'Assurance-Maladie), provider of the SNDS data, and published in an upcoming paper (data not available yet for administrative delays).

1  
2  
3 Second, the 1-month period between the first (day 1) phone call in the intervention group and  
4 the second (month 1) phone call in the control group was not always respected. When designing  
5 the study, GPs were expected to phone their patients allocated to the intervention group during  
6 the week after the initiation of the study. The study started on April 30, 2020, and therefore we  
7 expected that all day-1 phone calls would have been completed before May 7, 2020. As a result,  
8 month-1 phone calls were expected to take place before June 4, 2020. However, day-1 phone  
9 calls took place between April 30, 2020 and June 8, 2020 for CVD patients and between April  
10 30, 2020 and May 25, 2020 for MHD patients. Therefore, the last month-1 phone call took place  
11 on July 2, 2021 for CVD patients, and on July 3, 2021 for MHD patients. Hence, considering  
12 the 1-month period after randomisation as the observational period of interest would not be  
13 sensible. We decided to consider, for each patient, an observational period defined as the period  
14 between April 30, 2020 and the date of their month-1 phone call. This led to variations in  
15 observational period length between patients. However, there is no reason to consider that the  
16 distributions of these lengths would differ between groups.

17  
18 Third, blinding was not possible in the present trial because of the nature of the intervention.  
19 There is a risk of performance and contamination bias, with GPs allocated to a control group  
20 calling their patients before the planned 1-month delay. We could not totally avoid this risk.  
21 However, this performance bias, if present, may have resulted in an underestimation of the  
22 intervention effect.

23  
24 Beyond these limitations, the strength of COVIQuest trial was as both a healthcare and a  
25 research project. This opportunity to conjugate a strategy to detect decompensations in patients  
26 with chronic disease during the lockdown and an evaluation of this strategy with a high level  
27 of evidence motivated 149 GPs to participate with their medical trainees. GPs were all new to  
28 research and signed up for free as investigators, which demonstrates their strong motivation to  
29 improve care and research during the covid-19 pandemic. Another strength was the design of

1  
2  
3 the protocol allowing all trial participants to benefit from the intervention while maintaining  
4 the experimental design. With a protocol randomising not patients to be called but rather the  
5 order of the patients to be called, each patient participating in the trial received a GP-initiated  
6 phone call to assess their state of health, which agreed with government recommendations.<sup>10</sup>  
7  
8  
9

10  
11  
12 Considering the results of the primary outcome for both the COVIQuest\_CV and  
13 COVIQuest\_MH subtrials, the reasons for those early hospitalisations at 1 month are not fully  
14 known. In the COVIQuest\_CV subtrial, the intervention and control groups did not differ in 1-  
15 month hospitalisation number. This lack of difference could be explained by a lack of power of  
16 the study because the sample size had not been reached particularly because of GP withdrawals.  
17 It could also be explained by an unexpected reduction in incidence of myocardial infarction  
18 during the lockdown period, which led to lack of impact of an under-use of care for CVD  
19 patients. Hypotheses for a truly reduced incidence of myocardial infarction include reduced  
20 triggers such as physical activity or air pollution<sup>17</sup>. The COVIQuest\_MH subtrial showed a  
21 higher 1-month hospitalisation rate in the intervention than control group. This result was the  
22 opposite of the hypothesis that the intervention phone call would result in a reduced  
23 hospitalisation rate. This increase in early hospitalisations for patients with a chronic MHD may  
24 have avoided more complicated or critical issues such as suicides, psychiatric decompensations,  
25 or substance/drug abuse that were particularly frequent in patients living with a chronic MHD  
26 during the covid-19 pandemic<sup>18-19</sup>. Data on mortality, hospitalisations, and recourse of care  
27 analyses using the SNDS system at 6 months could give some answers.  
28  
29  
30  
31  
32  
33  
34  
35  
36  
37  
38  
39  
40  
41  
42  
43  
44  
45  
46  
47  
48  
49  
50  
51  
52  
53  
54  
55  
56  
57  
58  
59  
60

## Conclusion

A GP-initiated phone call during the first covid-19 lockdown in France may have been associated with increased number of hospitalisations within 1 month in MHD patients. Conversely, this phone call had no significant impact on number of hospitalisations within 1 month in CVD patients.

For peer review only

## Contributorship statement

Each author participated to the study design, revised the work critically for important intellectual content, gave his/her final approval of the version to be published and agreed to be accountable for all aspects of the work in ensuring that questions related to the accuracy or integrity of any part of the work are appropriately investigated and resolved.

Dibao-Dina Clarisse, Léger Julie, Boussageon Rémy, Pouchain Denis and Giraudeau Bruno conceived the study.

Ettori-Ajasse Isabelle, Chambe Juliette, Abou-Mrad-Fricquegnon Karim, Sun Sophie, Jego Maeva, Motte Baptiste, Chiron Benoit, Sidorkiewicz Stéphanie, Khau Cam-Anh, Bouchez Tiphonie, Ghali Maria, Bruel Sébastien and the COVIQuest group participated to the acquisition of the data.

Léger Julie and Giraudeau Bruno analysed the data. Data were then interpreted with Dibao-Dina Clarisse.

Dibao-Dina Clarisse, Léger Julie and Giraudeau Bruno drafted the work.

## Competing interests

The COVIQuest study was funded by the University Hospital of Tours Endowment Funds. We confirm that the sponsor had no role in the study design; in the collection, analysis, and interpretation of data; in the writing of the report; and in the decision to submit the article for publication. We also confirm the independence of researchers from funders and that all authors, external and internal, had full access to all of the data (including statistical reports and tables) in the study and can take responsibility for the integrity of the data and the accuracy of the data analysis.



**Funding**

This work was supported by the University Hospital of Tours Endowment Fund, grant number DF-097.

**Data sharing statement**

Technical appendix, statistical code, and dataset are available on request.

## References

1. Bernard Stoecklin S, Rolland P, Silue Y, et al.; Investigation Team. First cases of coronavirus disease 2019 (COVID-19) in France: surveillance, investigations and control measures, January 2020. *Euro Surveill.* 2020;25:6.
2. Hodcroft EB. Preliminary Case Report on the SARS-CoV-2 Cluster in the UK, France, and Spain. *Swiss Med Wkly.* 2020;150:9-10.
3. Yuan J, Li M, Lv G, Lu ZK. Monitoring Transmissibility and Mortality of COVID-19 in Europe. *Int J Infect Dis.* 2020;95:311-5.
4. Ministère de la Santé. PRISE EN CHARGE EN VILLE PAR LES MÉDECINS DE VILLE DES PATIENTS SYMPTOMATIQUES EN PHASE ÉPIDÉMIQUE DE COVID-19. 2020 disponible sur: <https://solidarites-sante.gouv.fr/soins-et-maladies/maladies/maladies-infectieuses/coronavirus/professionnels-de-sante/article/en-ambulatoire-recommandations-covid-19-et-prise-en-charge>.
5. Saint-Lary O, Gautier S, Le Breton J, et al. How GPs adapted their practices and organisations at the beginning of COVID-19 outbreak: a French national observational survey. *BMJ Open* 2020;10:e042119.
6. Rimmer A. Covid-19: GPs can stop health checks for over 75s and routine medicine reviews. *BMJ.* 2020;368:m1157.
7. Arrêté du 23 mars 2020 prescrivant les mesures d'organisation et de fonctionnement du système de santé nécessaires pour faire face à l'épidémie de covid-19 dans le cadre de l'état d'urgence sanitaire. Available at : <https://www.legifrance.gouv.fr/affichTexte.do?cidTexte=JORFTEXT000041746744&dateTexte=20200403>.

- 1  
2  
3 8. Ha NT, Harris M, Preen D, Robinson S, Moorin R. A time-duration measure of continuity  
4 of care to optimise utilisation of primary health care: a threshold effects approach among  
5 people with diabetes. *BMC Health Serv Res.* 2019;19(1):276.  
6  
7
- 8  
9  
10 9. Hinton W, McGovern A, Coyle R, Han TS, Sharma P, Correa A, Ferreira F, de Lusignan S.  
11 Incidence and prevalence of cardiovascular disease in English primary care: a cross-  
12 sectional and follow-up study of the Royal College of General Practitioners (RCGP)  
13 Research and Surveillance Centre (RSC). *BMJ Open.* 2018;8(8):e020282.  
14  
15
- 16  
17 10. Ministère de la Santé. Prise en charge hors COVID19. 2020 available at: [https://solidarites-  
19 sante.gouv.fr/IMG/pdf/soins-hors-covid-19.pdf](https://solidarites-<br/>18 sante.gouv.fr/IMG/pdf/soins-hors-covid-19.pdf).  
20  
21
- 22  
23 11. Da Silva N, Fleury L, Batifoulier P, Vanhille JL, Bréchat PH. Les liens entre la performance  
24 médicale et la composition de la patientèle : Une étude économétrique sur les médecins  
25 d'Ile-de-France. *Journal de gestion et d'économie médicales.* 2015;33:191-214.  
26  
27
- 28  
29 12. Caille A, Kerry S, Tavernier E, Leyrat C, Eldridge S, Giraudeau B. Timeline cluster: a  
30 graphical tool to identify risk of bias in cluster randomised trials. *BMJ.* 2016;354:i4291.  
31  
32
- 33  
34 13. Données relatives à l'ensemble des bénéficiaires du dispositif des ALD une année donnée.  
35 2021 available at: [https://www.ameli.fr/l-assurance-maladie/statistiques-et-  
38 publications/donnees-statistiques/affection-de-longue-duree-ald/prevalence/prevalence-  
39 des-ald-en-2019.php](https://www.ameli.fr/l-assurance-maladie/statistiques-et-<br/>36 publications/donnees-statistiques/affection-de-longue-duree-ald/prevalence/prevalence-<br/>37 des-ald-en-2019.php).  
40  
41
- 42  
43 14. Campbell MK, Fayers PM, Grimshaw JM. Determinants of the intracluster correlation  
44 coefficient in cluster randomized trials: the case of implementation research. *Clin Trials.*  
45 2005;2(2):99-107.  
46  
47
- 48  
49 15. Donner A, Klar N. Confidence interval construction for effect measures arising from cluster  
50 randomization trials. *J Clin Epidemiol.* 1993;46(2):123-31.  
51  
52  
53  
54  
55  
56  
57  
58  
59  
60

- 1  
2  
3 16. Giraudeau B, Ravaud P. Preventing bias in cluster randomised trials. *PLoS Med.*  
4  
5 2009;6(5):e1000065.  
6  
7  
8 17. Mesnier J, Cottin Y, Coste P, et al. Hospital admissions for acute myocardial infarction  
9  
10 before and after lockdown according to regional prevalence of COVID-19 and patient  
11  
12 profile in France: a registry study. *Lancet Public Health.* 2020;5(10):e536-e542.  
13  
14  
15 18. Czeisler MÉ, Lane RI, Petrosky E, et al. Mental Health, Substance Use, and Suicidal  
16  
17 Ideation During the COVID-19 Pandemic - United States, June 24-30, 2020. *MMWR Morb*  
18  
19 *Mortal Wkly Rep.* 2020;69(32):1049-1057.  
20  
21  
22  
23 **19.** Robillard R, Daros AR, Phillips JL, et al. Emerging New Psychiatric Symptoms and the  
24  
25 Worsening of Pre-existing Mental Disorders during the COVID-19 Pandemic: A Canadian  
26  
27 Multisite Study: Nouveaux symptômes psychiatriques émergents et détérioration des  
28  
29 troubles mentaux préexistants durant la pandémie de la COVID-19: une étude canadienne  
30  
31 multisite. *Can J Psychiatry.* 2021:706743720986786.  
32  
33  
34  
35  
36  
37  
38  
39  
40  
41  
42  
43  
44  
45  
46  
47  
48  
49  
50  
51  
52  
53  
54  
55  
56  
57  
58  
59  
60

### **Ethics approval**

The COVIQuest study obtained ethics approval from CPP Sud-Méditerranée 3 (no. 2020.04.21 ter\_20.04.17.42325).

Participants gave oral consent to the medical trainee/general practitioner team before taking part in the study. Consents were recorded in the general practitioner's files.

### **Transparency declaration**

As a lead author, Clarisse Dibao-Dina affirms that the manuscript is an honest, accurate, and transparent account of the study being reported; that no important aspects of the study have been omitted; and that any discrepancies from the study as originally planned (and, if relevant, registered) have been explained.

### **Acknowledgements**

We thank Veronique Laurent-Buron for her help all along the study.

We also thank all the medical students who helped the general practitioners during the study, particularly: Marie Landry, Manon Colombarini, Lucie Barrier, Céline Georges, Lucile Nart, Manon Colombarini, Pierre Lebras, Elodie Payet, Frédéric Letronnier, Anne Claire FOUCAT, Tiphonie Viton, Calin Cozma, Julie Seguinot, Loriane Bonnet, Marion Denis, Claire Audouit, Guillaume Besançon, Beaupuy Jérôme, Matthieu Guilbert, Joelle Samy, Matthieu Guilbert, Anouk Boever, Cédric Grunewald, Fournier Camille, Axelle Lafortune-Michel, Marie Paulus, Solène Donval, Sarah Zadane, Maxime Even, Marie Lancelot, Teddy Marolany, Bilal Zater, Abdelmoumni Sarah, Razi Muhammed, Rabab Dini, Mmadi Benaym, Nassima Samira Chouaki, Alexandre Gillibert, Elise Brunetiere,

1  
2  
3 Julien Andouard, Hadrien Payen, Marie Blois, Guillemette Boyer, Marie Conte, David  
4 Hassan, Céline Terrasse, Lucile Ruin, Rachid Setaihi, Gaëlle Schoch, Cindy Filly, Valéria  
5 Zizolfi, Marie Quantin, Marine Barbier, Hulot Guillaume, Sara Da mota Pereira, Anaïs  
6 Wagenheim, Loren Audia, Simonnet Elisa, Raissa Wanyou, Laure Patturel, Houari Kaid  
7 Ali, Marie Citounadin, Tang Vu Tuong Van, Xavier Bolla, Claire Le Lièvre de la  
8 Morinière, François Pettinotti, Agathe Edeline, Céline Duchossoir, Marianne Dufournier,  
9 Agathe Pinot, Clément Bertrand, Guillaume Rioult, Cynthia Delauneay Belleville.  
10  
11  
12  
13  
14  
15  
16  
17  
18  
19  
20  
21  
22  
23  
24  
25  
26  
27  
28  
29  
30  
31  
32  
33  
34  
35  
36  
37  
38  
39  
40  
41  
42  
43  
44  
45  
46  
47  
48  
49  
50  
51  
52  
53  
54  
55  
56  
57  
58  
59  
60

1  
2  
3  
4  
5  
6  
7  
8  
9  
10  
11  
12  
13  
14  
15  
16  
17  
18  
19  
20  
21  
22  
23  
24  
25  
26  
27  
28  
29  
30  
31  
32  
33  
34  
35  
36  
37  
38  
39  
40  
41  
42  
43  
44  
45  
46

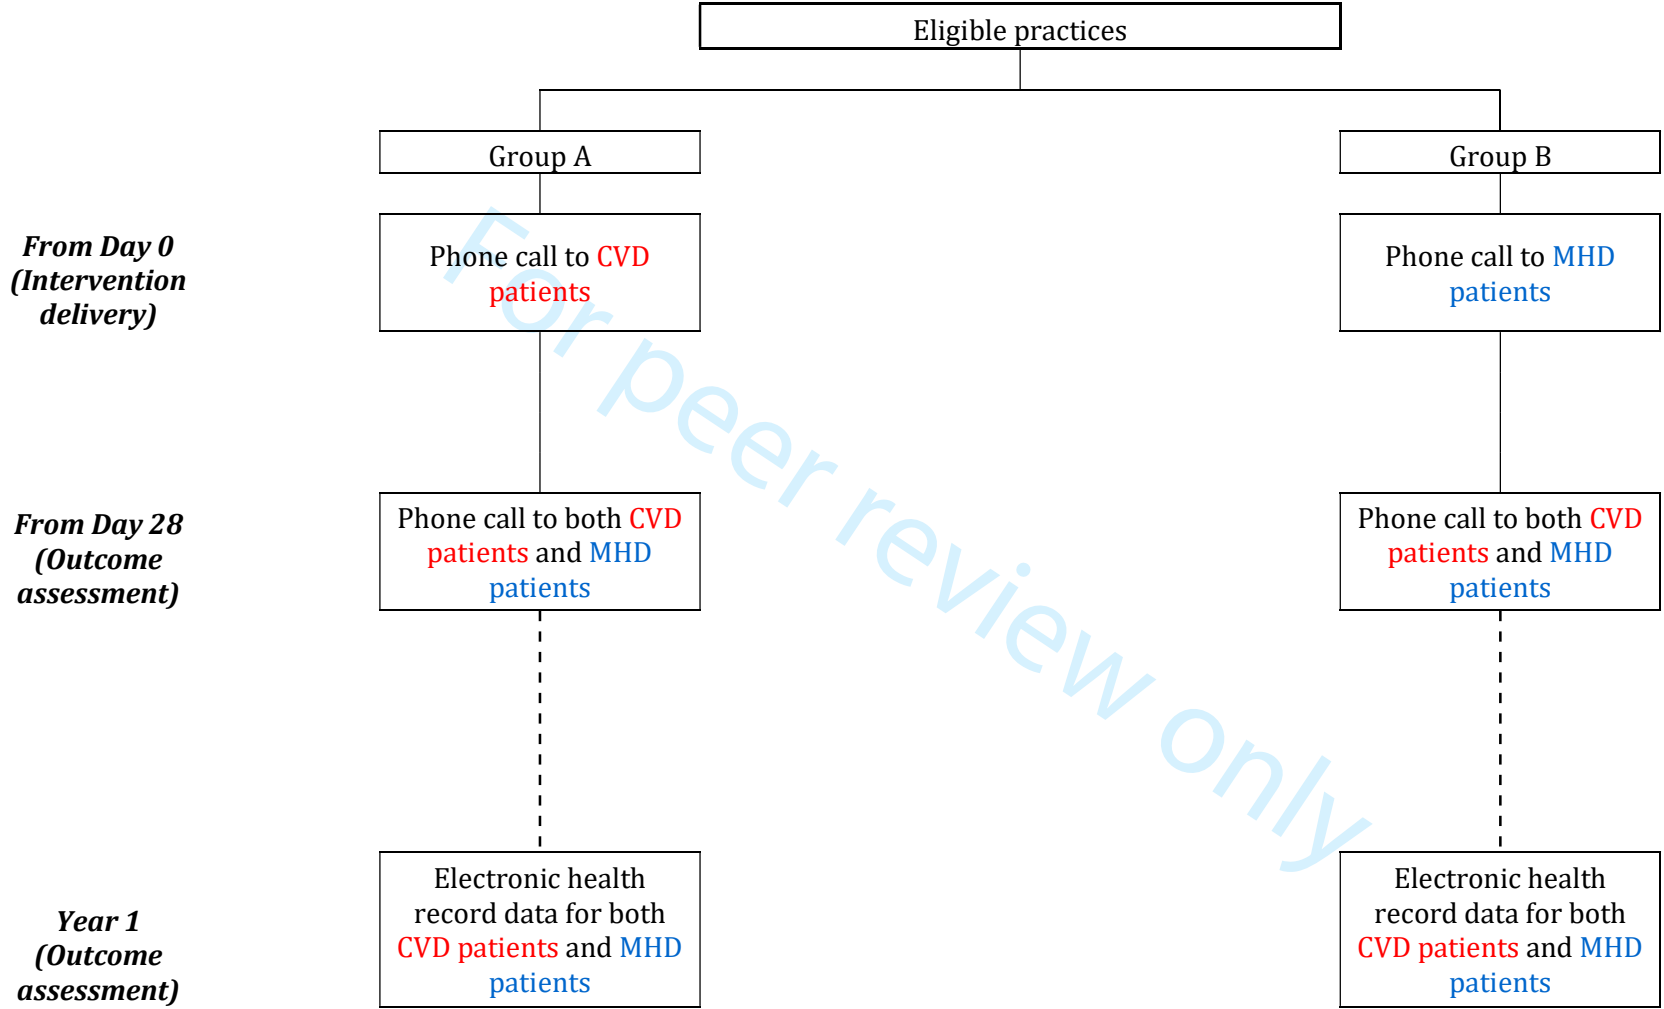

CVD patients: patients with a cardiovascular disease - MHD patients: patients with a mental health disorder

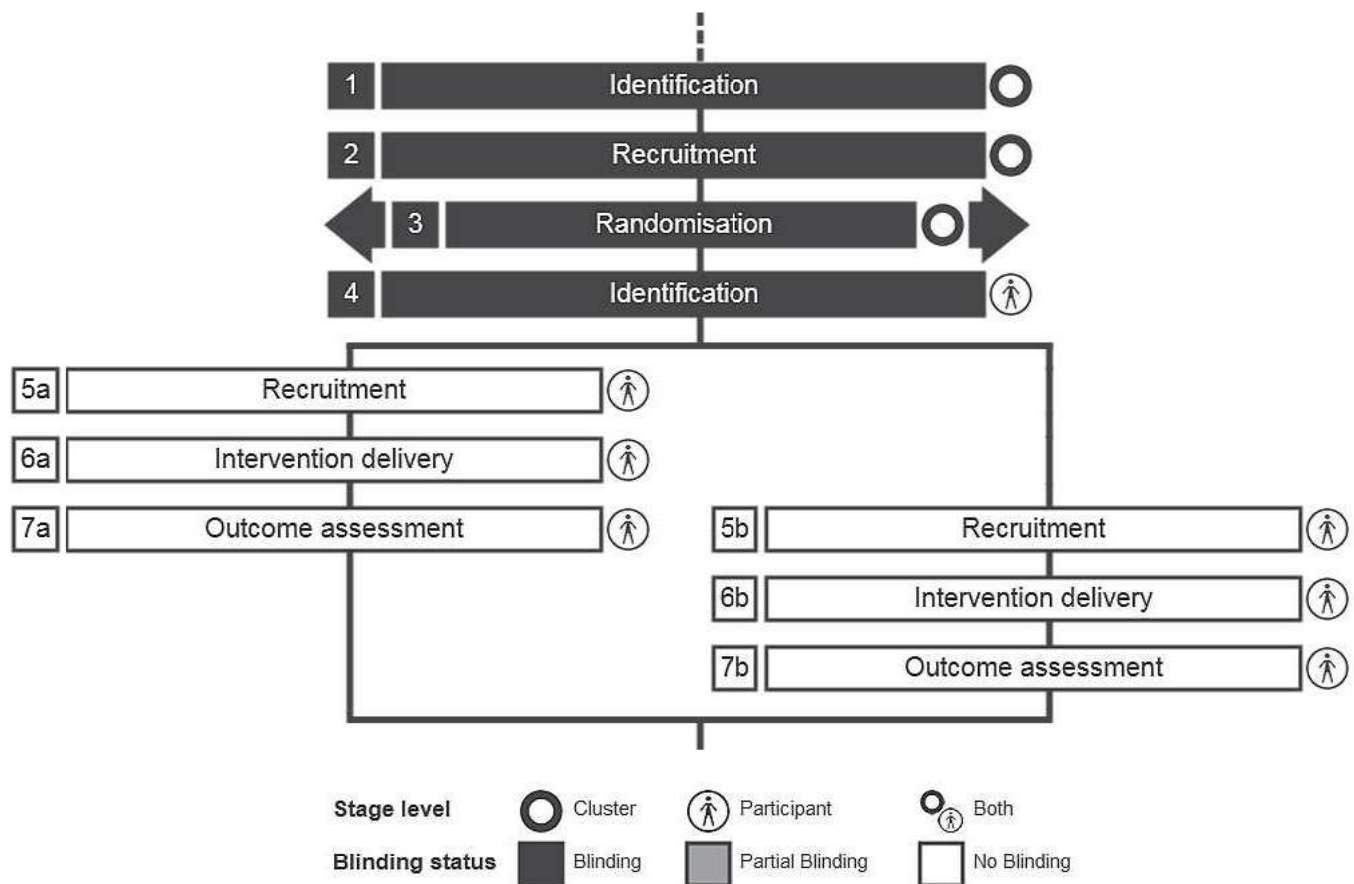**1 Identification**

General practitioners (GPs) practising as training supervisors from 8 different French administrative regions are identified.

**2 Recruitment**

GPs who agree to participate are recruited.

**3 Randomisation**

GPs are randomised. In case several GPs work within the same practice, randomisation is forced such that all GPs from a common practice are allocated to the same group. This comes down to randomise practices. Randomisation is stratified on administrative regions.

**4 Identification**

In the COVIQuest\_CV subtrial, patients  $\geq 70$  years old with a chronic cardiovascular disease (CVD patients) are identified. In the COVIQuest\_MH subtrial, patients  $\geq 18$  years old with a mental disorder (MHD patients) are identified. Patients with both a cardiovascular disease and a mental health disorder are not eligible. GPs are not informed of their randomised allocation while identifying patients.

**5a Recruitment**

In the intervention group, GPs or their students phone to patients and ask them whether they agree to be included in the trial.

**6a Intervention delivery**

In the same phone call during which patients' consent is obtained, patients are asked 3 questions by the GP or his/her student: 1) How are you doing? 2) Would you have made an appointment with your GP if there had not been Covid 19 epidemic and lockdown? 3) Would you like an appointment with your doctor?

**7a Outcome assessment**

One month after their recruitment, patients are contacted again by their GP or his/her student, and asked whether they have been hospitalised.

**5b Recruitment**

One month after the beginning of the study, patients are contacted by their GP or his/her student, and asked whether they agree to be included in the trial.

**6b Outcome assessment**

In the same phone call during which patients' consent is obtained, patients are asked whether they have been hospitalised.

**7b Intervention delivery**

Still during the same phone call, the intervention (i.e. asking the 3 short questions) is delivered.



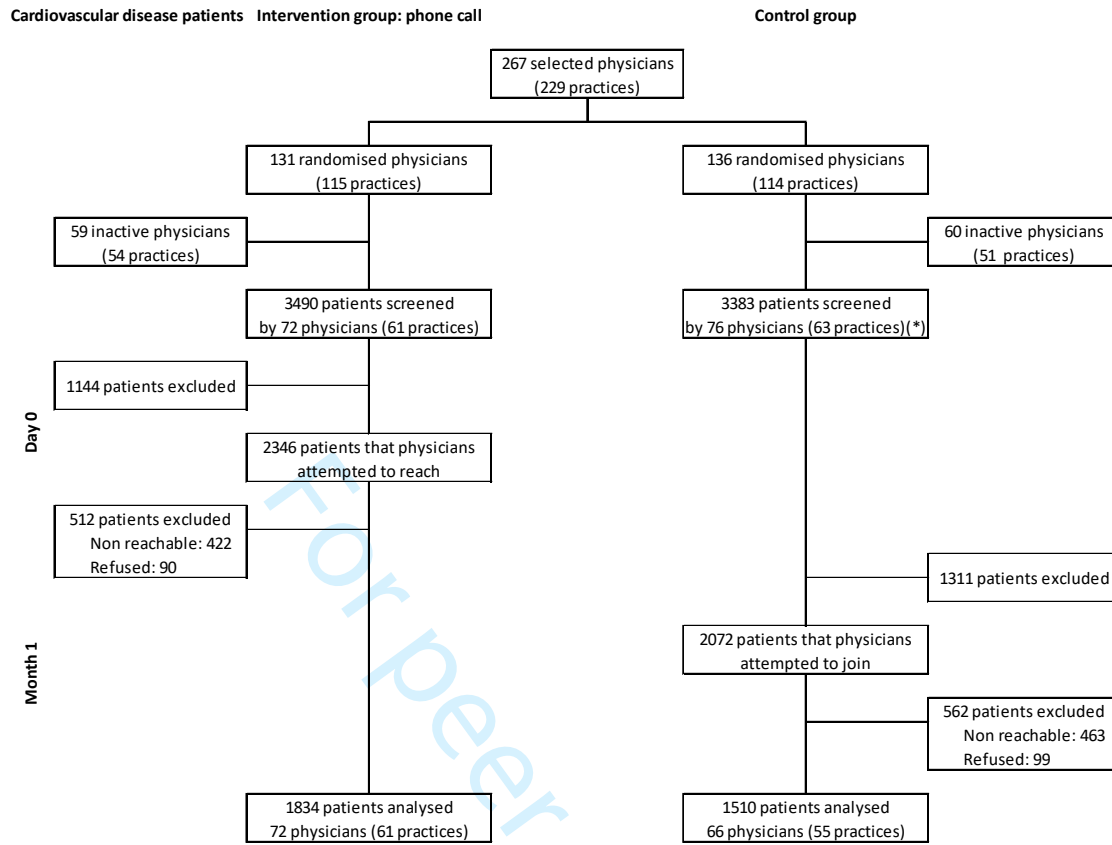

(\*) One physician (1 practice) screened patients with mental health disorders but no patient with cardiovascular disease

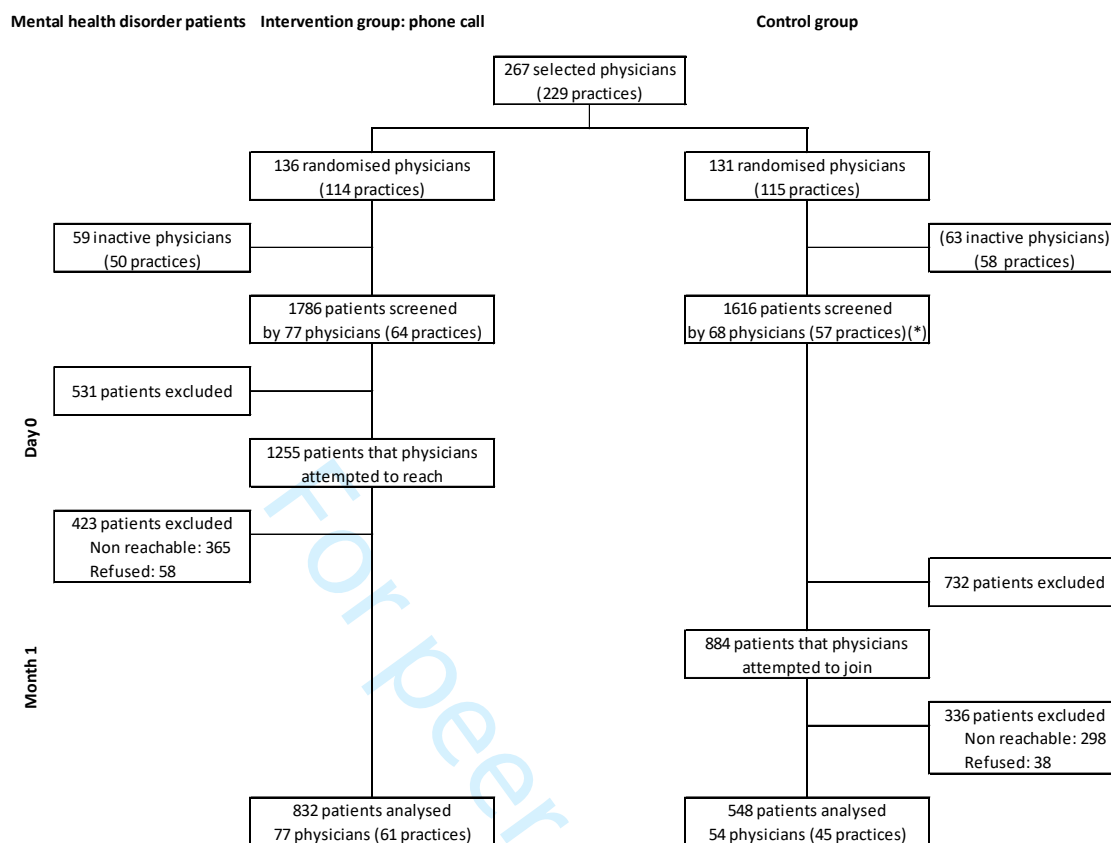

(\*) Four physicians (4 practices) screen patients with mental health disorder but no patients with cardiovascular disease

## Supplementary files

### Appendix 1. List of study sites, coordinators and general practitioners from the COVIQuest group

| Name                      | Academic general practice department | Administrative area  | General Practitioners                                                                                                                                                                                                                                                                                                                                                                                                                                                                                                                                                                                                                                                                                                                                                                                                                                                                                 |
|---------------------------|--------------------------------------|----------------------|-------------------------------------------------------------------------------------------------------------------------------------------------------------------------------------------------------------------------------------------------------------------------------------------------------------------------------------------------------------------------------------------------------------------------------------------------------------------------------------------------------------------------------------------------------------------------------------------------------------------------------------------------------------------------------------------------------------------------------------------------------------------------------------------------------------------------------------------------------------------------------------------------------|
| Ettori-Ajasse<br>Isabelle | Tours                                | Centre-Val de Loire  | SAMKO BORIS, DIBAO-DINA CLARISSE, GONZALES ANNE-MARIE, GAY-LAUNAY KARINE, MOLIMART FRANCOIS, BADEY-MEURISSE ALEXANDRA, THOMAS MARIE, PHILIPPE LAURENCE, LEROUX FARRUGIA DELPHINE, LEFEVRE RÉMI, LANG VIRGINIE, LIZE SOPHIE, DUGUE DURET MARIE-LOUISE, BAGOURD EMMANUEL, RICOIS AMÉLIE, CUVILLIER OLIVIER, DE LA PORTE DES VAUX CÉDRIC, BROUX HÉLÈNE, BACHELIER JEAN-YVES, ROBERT JEAN, BORDEAUX SAMUEL, CHALEIX LYSIANE, GABERT MARTINE, GRISON XAVIER, SIMONEAU CORINNE, PÈRE DOMINIQUE, BOURDU STÉPHANIE, DUMAS ADRIEN, LAUVERJAT FLORENCE, MAUPERTUIS QUENTIN, NOE LAGRANGE ANAIDE, TIERCIN SYLVIE, DUMOT PIERRE, AUMARECHAL ALAIN, MOLINA VALÉRIE, RIVOAL BERNARD, GROSSE JULIE, GALY VINCENT, DESRUES PATRICE, YVON-PETRAULT BLANDINE, VIEILLE ROGER, WITTKE LAURENCE, RUBE DELPHINE, BAUSSANT ALEXANDRE, MONTPERT-BOUVIER LUCIE, CONSTANT MARIE-VÉRONIQUE, TEN KET KIAN FRANÇOIS, PERRAIN ALICE |
| Sun Sophie                | Lyon                                 | Auvergne-Rhône-Alpes | JACQUIOT DENIS, MUZELLE VÉRONIQUE, PIGACHE CHRISTOPHE, LAMORT BOUCHE MARION, MANGOT CLAIRE, BENEDINI ELISE, LAVILLE AGNÈS, POTENCIER BENJAMIN, FOSSIER BENOIT, VALLE FLORIAN, FAY ISABELLE, CHAMBION PIERRE, BRYs VERONIQUE, SUN SOPHIE, BELLECOSTE VINCENT, FLORI MARIE                                                                                                                                                                                                                                                                                                                                                                                                                                                                                                                                                                                                                              |
| Jego Maeva                | Marseille                            | Occitanie            | DE TADDEO CHRISTINE, THERY DIDIER, CORDEL ANNE CATHERINE, GUERCIA OLIVIER, BARGIER JACQUES, TUDOSE IRINA, NUSSLI NICOLAS                                                                                                                                                                                                                                                                                                                                                                                                                                                                                                                                                                                                                                                                                                                                                                              |
| Motte Baptise             | Lille catholique                     | Hauts de France      | NGUYEN BRUNO, MORIN PIERRE-ETIENNE, DURAND-CHEVAL CLOTILDE, MOTTE BAPTISTE, DANCHIN FREDERIC                                                                                                                                                                                                                                                                                                                                                                                                                                                                                                                                                                                                                                                                                                                                                                                                          |

|                        |                        |                            |                                                                                                                                                                                                                                                                                                                        |
|------------------------|------------------------|----------------------------|------------------------------------------------------------------------------------------------------------------------------------------------------------------------------------------------------------------------------------------------------------------------------------------------------------------------|
| Bruel Sébastien        | Saint Etienne          | Auvergne-Rhône-Alpes       | FRUMUSELU RUXANDRA, DELEBARRE AMANDINE, FAVIE JULIEN                                                                                                                                                                                                                                                                   |
| Chiron Benoit          | Brest                  | Bretagne                   | GELINEAU THOMAS, LE GOFF DELPHINE, VERBEQUE MORVAN, MANON DARABAN TUDOR, PENIN GAELLE, LUCAS ALDRIC, LOPIN CÉLINE, FONSECA JÉRÔME, LE GUENNEC ANGÉLIQUE                                                                                                                                                                |
| Chambe Juliette        | Strasbourg             | Grand Est                  | GHALI-DEBUS ISABELLE, MAGINOT HÉLÈNE, ZUMSTEIN CARINE, ROOS-BERNARD SÉVERINE, RUXER SERGE, PLAUM MANUELA, GUIHENEUF CHARLINE, LENERTZ JOHN, ERNST MYRIAM, CHAMBE JULIETTE, DE CHAZELLES GRÉGOIRE, BUCHLIN FRANÇOIS, HILD PHILIPPE, VONAU PHILIPPE, DUMAS BREITWILLER CLAIRE, BERTHOU ANNE, CHARTON LÉA, LÉPINE CAMILLE |
| Sidorkiewicz Stéphanie | Paris Descartes        | Ile de France              | OLESKER SOPHIE, MALMARTEL ALEXANDRE, GHASAROSSIAN CHRISTIAN, RUSSO PATRICK, ANDERSON MARGUERITE, RICHEMOND MICHÈLE, SIDORKIEWICZ STÉPHANIE, ECOLLAN MARIE, JAURY PHILIPPE, BENAINOUS OLIVIER, MSIKA RAZON MARIE, CATU-PINAULT ANNIE                                                                                    |
| Khau Cam-Anh           | Paris Nord La Sorbonne | Ile de France              | KHAU CAM-ANH, BERKAI RANIA, MERCIER ALAIN, GRUNBERG PHILIPPE, PHAM LAN-ANH, RENAULT ALAINE, BACH LORENE, COUDERC AUDREY, CHEVALLIER FREDERIC, CHABANNES AUDREY                                                                                                                                                         |
| Bouchez Tiphane        | Nice                   | Provence-Alpes-Côte d'Azur | MELLERIN IANIS, BOUCHEZ TIPHANIE, GARSON SANDRINE, GARDON GILLES, PASCUCCI-ZAKARIAN SANDRINE, GUERVILLE VÉRONIQUE, MOUILLE BLANC CECILE, MUNCK STEPHANE, GUERVILLE MARC-ANDRÉ                                                                                                                                          |
| Ghali Maria            | Angers                 | Pays de la Loire           | JUDALET ILLAND GHISLAINE, PY THIBAUT, TESSIER CAZENEUVE CHRISTINE, RAMOND ROQUIN ALINE, GALLOT EMMANUEL, LOSSON DAUSSY GAELLE, LACOMBE ANTOINE, GABARD CATHERINE, DEVAUD BERTRAND, BUFFARD PASCAL, PLESSIS ANNE, BOURGEOIS CÉCILE                                                                                      |

**Appendix 2. List of 30 long-term illnesses (ALD 30) that are exempt from user fees**

ALD no. 1 - Invalid stroke

ALD no. 2 - Bone marrow failure and other chronic cytopenias

ALD no. 3 - Chronic arteriopathies with ischemic manifestations

ALD no. 4 - Complicated bilharziasis

ALD no. 5 - Severe heart failure, severe arrhythmia, severe valvular heart disease; Graves congenital heart disease

ALD no. 6 - Chronic active diseases of the liver and cirrhosis

ALD no. 7 - Severe primary immune deficiency, prolonged treatment, infection with human immunodeficiency virus

ALD no. 8 - Type 1 diabetes and type 2 diabetes

ALD no. 9 - Severe form of neurological and muscular disorders (including myopathy), severe epilepsy

ALD no. 10 - Hemoglobinopathies, hemolysis, chronic constitutional and acquired severe

ALD no. 11 - Hemophilia and constitutional disorders of severe hemostasis

ALD no. 12 - Severe hypertension

ALD no. 13 - Coronary disease

ALD no. 14 - Severe chronic respiratory failure

ALD no. 15 - Meadow

ALD no. 16 - Parkinson disease

ALD no. 17 - Hereditary metabolic diseases a prolonged specialized treatment

ALD no. 18 - Cystic fibrosis

ALD no. 19 - Severe chronic nephropathy and primary nephrotic syndrome

ALD no. 20 - Paraplegia

ALD no. 21 - Periarthritis nodosa, acute systemic lupus erythematosus, progressive generalized scleroderma

ALD no. 22 - Progressive rheumatoid arthritis

ALD no. 23 - Psychosis, severe personality disorder, mental retardation

ALD no. 24 - Ulcerative colitis and progressive Crohn's disease

ALD no. 25 - Multiple sclerosis

ALD no. 26 - Progressive structural scoliosis (with an angle equal to or greater than 25 degrees) until spinal maturation

ALD no. 27 - Fall from ankylosing spondylitis

1  
2  
3 ALD no. 28 - Organ transplant suites  
4

5 ALD no. 29 - Active tuberculosis  
6

7 ALD no. 30 - Malignant tumor, malignant disease of lymphatic or hematopoietic tissue.  
8  
9  
10  
11  
12  
13  
14  
15  
16  
17  
18  
19  
20  
21  
22  
23  
24  
25  
26  
27  
28  
29  
30  
31  
32  
33  
34  
35  
36  
37  
38  
39  
40  
41  
42  
43  
44  
45  
46  
47  
48  
49  
50  
51  
52  
53  
54  
55  
56  
57  
58  
59  
60

For peer review only

### Appendix 3. Interview guide

#### Information and oral consent of the patient:

I am Mr/Mrs X, a student in my Nth year of medical school at Dr Y's practice. I am calling you at the request of your GP Dr Y to ask you three short questions. The answers you give me will enable Dr Y to know how you are doing and to offer you appropriate care during lockdown if necessary. Your answers will be used anonymously in the COVIQUEST study in which Dr Y is participating. The aim of this study is to find out what impact this call has on your care. (Only for patients in the intervention group: If you agree to your answers being used in this study, you should know that you will be contacted again in 1 month time to hear from you in the same way). If you do not want your answers to be used for the study, please note that this will not affect your treatment by Dr Y. Do you accept that I ask you questions? I would like to remind you that your answers will be completely anonymous and that you can say at any time that you no longer wish your answers to be collected in the framework of COVIQUEST, without any impact on your care. If you have any questions to ask me or would like to discuss them with Dr Y, please do not hesitate.

#### Intervention:

How are you doing? (using a Likert scale of 1 = very bad to 10 = very good)

Would you have made an appointment with your GP if there had not been a lockdown related to the COVID19?

Would you like an appointment with your GP?

**Appendix 4. Baseline characteristics of general practitioners (GPs) by group\*.**

| <i>mean ± standard deviation &amp; median [Q1 ; Q3] for<br/>quantitative variables<br/>n (%) for qualitative variables</i> | <b>A</b><br>(n <sub>1</sub> = 72) | <b>B</b><br>(n <sub>2</sub> = 77) |
|----------------------------------------------------------------------------------------------------------------------------|-----------------------------------|-----------------------------------|
| Age (years)                                                                                                                | 49.9 ± 11.9<br>49.0 [38.0 ; 60.5] | 43.3 ± 10.3<br>39.0 [35.0 ; 53.0] |
| Sex: Male                                                                                                                  | 32 (44.4)                         | 30 (39.0)                         |
| Work organisation                                                                                                          |                                   |                                   |
| Practice, only physicians                                                                                                  | 39 (54.2)                         | 32 (41.6)                         |
| Alone                                                                                                                      | 5 (6.9)                           | 7 (9.1)                           |
| Practice, multidisciplinary healthcare centre                                                                              | 28 (39.0)                         | 38 (49.3)                         |
| Territorial professional health community                                                                                  | 30 (41.7)                         | 38 (49.3)                         |
| Advanced public health nurse                                                                                               | 12 (16.7)                         | 19 (24.7)                         |

\*Group A (cardiovascular disease [CVD] patients called first); group B (mental health disorder [MHD] patients called first)



## Appendix 5. COVIQuest\_CV results

**Table 1. Process evaluation of the intervention and outcome assessment**

| <i>mean ± standard deviation, median [Q1 ; Q3] &amp; {Min ; Max} for quantitative variables<br/>n (%) for qualitative variables</i> | <b>A - Intervention group - Phone call</b><br>(n <sub>1</sub> = 1834) | <b>B - Control group</b><br>(n <sub>2</sub> = 1510) |
|-------------------------------------------------------------------------------------------------------------------------------------|-----------------------------------------------------------------------|-----------------------------------------------------|
| Who phoned (intervention phone call)? - n <sub>1</sub> = 1801                                                                       |                                                                       |                                                     |
| Physician                                                                                                                           | 236 (13.1)                                                            |                                                     |
| Student                                                                                                                             | 1448 (80.4)                                                           |                                                     |
| Other person (e.g. secretary)                                                                                                       | 117 (6.5)                                                             |                                                     |
| Time between April 30th 2020 and phone call (days)                                                                                  | 11.7±8.0<br>12.0 [5.0 ; 15.0]<br>{0 ; 39}                             |                                                     |
| Time between the phone call and the outcome assessment (days) - n <sub>1</sub> = 1508                                               | 34.1±7.0<br>33.0 [29.0 ; 39.0]<br>{12 ; 58}                           |                                                     |
| Time between April 30th 2020 and the outcome assessment (days) - n <sub>1</sub> = 1508, n <sub>2</sub> = 1510                       | 45.6±8.7<br>47 [40 ; 53]<br>{26 ; 64}                                 | 48.7±7.8<br>48 [42 ; 56]<br>{26 ; 63}               |

**Table 2. Patient health status when phoned (intervention group)**

| <i>mean ± standard deviation &amp; median [Q1 ; Q3] for<br/>quantitative variables<br/>n (%) for qualitative variables</i> | <b>A - Intervention<br/>group - Phone<br/>call<br/>(n<sub>1</sub> = 1834)</b> |
|----------------------------------------------------------------------------------------------------------------------------|-------------------------------------------------------------------------------|
| Had consultations with his/her physician since the<br>beginning of the lockdown period - n <sub>1</sub> = 1825             | 851 (46.6)                                                                    |
| Number of consultations - n <sub>1</sub> = 845                                                                             | 1.5±0.9<br>1 [1 ; 2]                                                          |
| Had a contact with his/her physician since the beginning<br>of the lockdown period - n <sub>1</sub> = 1811                 | 500 (27.6)                                                                    |
| Health status perception - n <sub>1</sub> = 1820 (*)                                                                       | 7.4±1.8<br>8 [6 ; 9]                                                          |
| Would have made an appointment - n <sub>1</sub> = 1828                                                                     | 856 (46.8)                                                                    |
| Would like an appointment - n <sub>1</sub> = 1828                                                                          | 611 (33.4)                                                                    |

(\*) 0-10 Likert scale

**Table 3. Symptoms (for patients who declared they would like an appointment)**

| <i>n (%) for qualitative variables</i>    | <b>A - Intervention group - Phone call - Patients who wanted an appointment<br/>(n = 611)</b> |
|-------------------------------------------|-----------------------------------------------------------------------------------------------|
| Number of symptoms - n <sub>1</sub> = 459 |                                                                                               |
| 1                                         | 374 (81.5)                                                                                    |
| 2                                         | 62 (13.5)                                                                                     |
| 3                                         | 23 (5.0)                                                                                      |
| Symptoms (*)                              |                                                                                               |
| General, non specific                     | 304 (53.6)                                                                                    |
| Blood system, immunology                  | 2 (0.3)                                                                                       |
| Digestive                                 | 35 (6.2)                                                                                      |
| Ocular                                    | 5 (0.9)                                                                                       |
| Ear                                       | 4 (0.7)                                                                                       |
| Cardiovascular                            | 60 (10.6)                                                                                     |
| Osteoarticular                            | 64 (11.3)                                                                                     |
| Neurological                              | 6 (1.1)                                                                                       |
| Psychological                             | 22 (3.9)                                                                                      |
| Respiratory                               | 22 (3.9)                                                                                      |
| Skin                                      | 15 (2.6)                                                                                      |
| Metabolism, nutrition                     | 11 (1.9)                                                                                      |
| Urology                                   | 8 (1.4)                                                                                       |
| Pregnancy                                 | 0                                                                                             |
| Reproductive system, female               | 2 (0.3)                                                                                       |
| Reproductive system, male                 | 0                                                                                             |
| Social                                    | 7 (1.2)                                                                                       |

(\*) One patient may have two or three symptoms

**Table 4. Patient health status when assessed**

| <i>mean ± standard deviation &amp; median [Q1 ; Q3] for quantitative variables<br/>n (%) for qualitative variables</i> | <b>A - Intervention group - Phone call</b><br>(n <sub>1</sub> = 1834) | <b>B - Control group</b><br>(n <sub>2</sub> = 1510) |
|------------------------------------------------------------------------------------------------------------------------|-----------------------------------------------------------------------|-----------------------------------------------------|
| Had COVID-19 disease - n <sub>1</sub> = 1586, n <sub>2</sub> = 1409                                                    |                                                                       |                                                     |
| Yes (TR-PCR test)                                                                                                      | 4 (0.2)                                                               | 7 (0.5)                                             |
| May-be                                                                                                                 | 72 (4.5)                                                              | 61 (4.3)                                            |
| Do not know                                                                                                            | 1510 (95.2)                                                           | 1341 (95.2)                                         |
| Health status perception - n <sub>1</sub> = 1457, n <sub>2</sub> =1488 (*)                                             | 7.4±1.8<br>8 [6 ; 9]                                                  | 7.3±1.9<br>8 [6 ; 8.5]                              |
| Had consultations with his/her physician since the beginning of the lockdown period - n <sub>2</sub> = 1417            |                                                                       | 1159 (81.8)                                         |
| Number of consultations - n <sub>2</sub> = 1155                                                                        |                                                                       | 1.9±1.3<br>1 [1 ; 2]                                |
| Had a contact with his/her physician since the beginning of the lockdown period - n <sub>2</sub> = 1454                |                                                                       | 580 (39.9)                                          |
| Would like an appointment - n <sub>2</sub> = 1500                                                                      |                                                                       | 308 (20.5)                                          |

(\*) 0-10 Likert scale

**Table 5. Causes of hospitalisations**

| <i>n (%) for qualitative variables</i>                 | <b>A - Intervention group - Phone call</b> | <b>B - Control group</b> |
|--------------------------------------------------------|--------------------------------------------|--------------------------|
| Cause of hospitalization - $n_1 = 64$ , $n_2 = 70$ (*) |                                            |                          |
| UCV: Cardiovascular emergency                          | 14 (21.9)                                  | 23 (32.9)                |
| TS: Suicide attempt                                    | 0                                          | 0                        |
| USM: Mental health emergency (except suicide attempt)  | 0                                          | 0                        |
| UAM: Other medical emergency                           | 30 (46.9)                                  | 18 (25.7)                |
| UAC: Other surgical emergency                          | 10 (15.6)                                  | 15 (21.4)                |
| PCV: Planned cardiovascular hospitalisation            | 2 (3.1)                                    | 0                        |
| PSM: Planned mental health hospitalisation             | 0                                          | 0                        |
| PAM: Planned other medical reason hospitalisation      | 1 (1.6)                                    | 7 (10.0)                 |
| PAC: Planned other surgical reason hospitalisation     | 7 (10.9)                                   | 7 (10.0)                 |

(\*) Units of analysis are hospitalisations not patients

## Appendix 6. COVIQuest\_MH results

**Table 1. Process evaluation of the intervention and outcome assessment**

| <i>mean ± standard deviation, median [Q1 ; Q3] &amp; {Min ; Max} for quantitative variables<br/>n (%) for qualitative variables</i> | <b>A - Control group</b><br>(n <sub>1</sub> = 548) | <b>B - Intervention group - Phone call</b><br>(n <sub>2</sub> = 832) |
|-------------------------------------------------------------------------------------------------------------------------------------|----------------------------------------------------|----------------------------------------------------------------------|
| Who phoned (intervention phone call)? n <sub>2</sub> = 814                                                                          |                                                    |                                                                      |
| Physician                                                                                                                           |                                                    | 85 (10.4)                                                            |
| Student                                                                                                                             |                                                    | 715 (87.8)                                                           |
| Other person (e.g. secretary)                                                                                                       |                                                    | 14 (1.7)                                                             |
| Time between April 30th 2020 and phone call (days)                                                                                  |                                                    |                                                                      |
|                                                                                                                                     |                                                    | 10.6±7.5                                                             |
|                                                                                                                                     |                                                    | 7.0 [5.0 ; 14.0]                                                     |
|                                                                                                                                     |                                                    | {0 ; 29}                                                             |
| Time between the phone call and the outcome assessment (days) - n <sub>2</sub> = 560                                                |                                                    |                                                                      |
|                                                                                                                                     |                                                    | 37.3±9.2                                                             |
|                                                                                                                                     |                                                    | 35.0 [29.0 ; 45.5]                                                   |
|                                                                                                                                     |                                                    | {12 ; 56}                                                            |
| Time between April 30th 2020 and the outcome assessment (days) - n <sub>1</sub> = 548, n <sub>2</sub> = 560                         |                                                    |                                                                      |
|                                                                                                                                     | 48.3±9.0                                           | 47.3±9.3                                                             |
|                                                                                                                                     | 49 [42 ; 56]                                       | 48 [41 ; 55.5]                                                       |
|                                                                                                                                     | {20 ; 64}                                          | {14 ; 63}                                                            |

**Table 2. Patient health status when phoned (intervention group)**

| <i>mean ± standard deviation &amp; median [Q1 ; Q3] for<br/>quantitative variables<br/>n (%) for qualitative variables</i> | <b>B - Intervention<br/>group - Phone<br/>call<br/>(n<sub>2</sub> = 832)</b> |
|----------------------------------------------------------------------------------------------------------------------------|------------------------------------------------------------------------------|
| Had consultations with his/her physician since the<br>beginning of the lockdown period - n <sub>2</sub> = 819              | 393 (48.0)                                                                   |
| Number of consultations - n <sub>2</sub> = 392                                                                             | 2.1±1.4<br>2 [1 ; 3]                                                         |
| Had a contact with his/her physician since the beginning<br>of the lockdown period - n <sub>2</sub> = 817                  | 211 (25.8)                                                                   |
| Health status perception - n <sub>2</sub> = 819 (*)                                                                        | 6.9±2.2<br>7 [5 ; 9]                                                         |
| Would have made an appointment - n <sub>2</sub> = 826                                                                      | 401 (48.5)                                                                   |
| Would like an appointment - n <sub>2</sub> = 826                                                                           | 302 (36.6)                                                                   |

(\*) 0-10 Likert scale

**Table 3. Symptoms (for patients who declared they would like an appointment)**

| <i>n (%) for qualitative variables</i>    | <b>B- Intervention group - Phone call - Patients who wanted an appointment<br/>n=302</b> |
|-------------------------------------------|------------------------------------------------------------------------------------------|
| Number of symptoms - n <sub>2</sub> = 246 |                                                                                          |
| 1                                         | 190 (77.2)                                                                               |
| 2                                         | 41 (16.7)                                                                                |
| 3                                         | 15 (6.1)                                                                                 |
| Symptoms (*)                              |                                                                                          |
| General, non specific                     | 131 (41.3)                                                                               |
| Blood system, immunology                  | 1 (0.3)                                                                                  |
| Digestive                                 | 21 (6.6)                                                                                 |
| Ocular                                    | 2 (0.6)                                                                                  |
| Ear                                       | 1 (0.3)                                                                                  |
| Cardiovascular                            | 8 (2.5)                                                                                  |
| Osteoarticular                            | 39 (12.3)                                                                                |
| Neurological                              | 12 (3.8)                                                                                 |
| Psychological                             | 57 (18.0)                                                                                |
| Respiratory                               | 12 (3.8)                                                                                 |
| Skin                                      | 7 (2.2)                                                                                  |
| Metabolism, nutrition                     | 5 (1.6)                                                                                  |
| Urology                                   | 5 (1.6)                                                                                  |
| Pregnancy                                 | 0                                                                                        |
| Reproductive system, female               | 2 (0.6)                                                                                  |
| Reproductive system, male                 | 2 (0.6)                                                                                  |
| Social                                    | 12 (3.8)                                                                                 |

(\*) One patient may have two or three symptoms



**Table 4. Patient health status when assessed**

| <i>mean ± standard deviation &amp; median [Q1 ; Q3] for quantitative variables<br/>n (%) for qualitative variables</i> | <b>A - Control group</b><br>(n <sub>1</sub> = 548) | <b>B - Intervention group - Phone call</b><br>(n <sub>2</sub> = 832) |
|------------------------------------------------------------------------------------------------------------------------|----------------------------------------------------|----------------------------------------------------------------------|
| Had COVID-19 disease - n <sub>1</sub> = 538, n <sub>2</sub> = 584                                                      |                                                    |                                                                      |
| Yes (TR-PCR test)                                                                                                      | 5 (0.9)                                            | 0                                                                    |
| May-be                                                                                                                 | 51 (9.5)                                           | 42 (7.2)                                                             |
| Do not know                                                                                                            | 482 (89.6)                                         | 542 (92.8)                                                           |
| Health status perception - n <sub>1</sub> = 544, n <sub>2</sub> =544 (*)                                               | 7.1±2.0<br>7 [6 ; 8]                               | 7.1±2.2<br>7 [6 ; 9]                                                 |
| Had consultations with his/her physician since the beginning of the lockdown period - n <sub>1</sub> = 546             | 367 (67.2)                                         |                                                                      |
| Number of consultations - n <sub>1</sub> = 366                                                                         | 2.1±1.5<br>1 [1 ; 3]                               |                                                                      |
| Had a contact with his/her physician since the beginning of the lockdown period - n <sub>1</sub> = 534                 | 247 (46.2)                                         |                                                                      |
| Would like an appointment - n <sub>1</sub> = 542                                                                       | 158 (29.1)                                         |                                                                      |

(\*) 0-10 Likert scale

**Table 5. Causes of hospitalisations**

| <i>n (%) for qualitative variables</i>                 | <b>A - Control group</b> | <b>B - Intervention group - Phone call</b> |
|--------------------------------------------------------|--------------------------|--------------------------------------------|
| Cause of hospitalization - $n_1 = 13$ , $n_2 = 26$ (*) |                          |                                            |
| UCV: Cardiovascular emergency                          | 0                        | 0                                          |
| TS: Suicide attempt                                    | 0                        | 1 (3.8)                                    |
| USM: Mental health emergency (except suicide attempt)  | 4 (30.8)                 | 7 (26.9)                                   |
| UAM: Other medical emergency                           | 3 (23.1)                 | 10 (38.5)                                  |
| UAC: Other surgical emergency                          | 4 (30.8)                 | 4 (15.4)                                   |
| PCV: Planned cardiovascular hospitalisation            | 0                        | 0                                          |
| PSM: Planned mental health hospitalisation             | 0                        | 0                                          |
| PAM: Planned other medical reason hospitalisation      | 1 (7.7)                  | 4 (15.4)                                   |
| PAC: Planned other surgical reason hospitalisation     | 1 (7.7)                  | 0                                          |

(\*) Units of analysis are hospitalisations not patients

# BMJ Open

**Impact of a phone-call with a medical student/general practitioner team on morbidity of chronic patients during the first French COVID-19 lockdown. COVIQuest: A cluster randomised trial**

|                                 |                                                                                                                                                                                                                                                                                                                                                                                                                                                                                                                                                                                                                                                                                                                                                                                                                                                                                                                                                                                                                                                                                                                                                                                                                                                                                                                                                                                                                                                                                                                                                  |
|---------------------------------|--------------------------------------------------------------------------------------------------------------------------------------------------------------------------------------------------------------------------------------------------------------------------------------------------------------------------------------------------------------------------------------------------------------------------------------------------------------------------------------------------------------------------------------------------------------------------------------------------------------------------------------------------------------------------------------------------------------------------------------------------------------------------------------------------------------------------------------------------------------------------------------------------------------------------------------------------------------------------------------------------------------------------------------------------------------------------------------------------------------------------------------------------------------------------------------------------------------------------------------------------------------------------------------------------------------------------------------------------------------------------------------------------------------------------------------------------------------------------------------------------------------------------------------------------|
| Journal:                        | <i>BMJ Open</i>                                                                                                                                                                                                                                                                                                                                                                                                                                                                                                                                                                                                                                                                                                                                                                                                                                                                                                                                                                                                                                                                                                                                                                                                                                                                                                                                                                                                                                                                                                                                  |
| Manuscript ID                   | bmjopen-2021-059464.R1                                                                                                                                                                                                                                                                                                                                                                                                                                                                                                                                                                                                                                                                                                                                                                                                                                                                                                                                                                                                                                                                                                                                                                                                                                                                                                                                                                                                                                                                                                                           |
| Article Type:                   | Original research                                                                                                                                                                                                                                                                                                                                                                                                                                                                                                                                                                                                                                                                                                                                                                                                                                                                                                                                                                                                                                                                                                                                                                                                                                                                                                                                                                                                                                                                                                                                |
| Date Submitted by the Author:   | 18-May-2022                                                                                                                                                                                                                                                                                                                                                                                                                                                                                                                                                                                                                                                                                                                                                                                                                                                                                                                                                                                                                                                                                                                                                                                                                                                                                                                                                                                                                                                                                                                                      |
| Complete List of Authors:       | Dibao-Dina, Clarisse ; University of Tours, Department of General Practice<br>Léger, Julie; CHRU Tours, CIC Tours<br>Ettori-Ajasse, Isabelle; University of Tours<br>BOIVIN, ESTELLE; CHRU Tours<br>Chambe, Juliette ; University of Strasbourg<br>Abou-Mrad-Fricquegnon, Karim; University of Tours<br>Sun, Sophie; Université Lyon 1 Faculté de Médecine Lyon-Est, CUMG<br>Jego, Maeva; Aix-Marseille-University<br>Motte, Baptiste; University of Lille<br>Chiron, Benoit; Bretagne Occidentale University<br>Sidorkiewicz, Stéphanie; Sorbonne Paris Cité, Paris Descartes University, General Practice Department, Paris, France, Hôpital Hôtel-Dieu<br>Khau, Cam-Anh; University of Paris Department of Medicine<br>Bouchez, Tiphonie; University of Nice Sophia Antipolis<br>Ghali, Maria; University of Angers<br>Bruel, Sébastien; Jean Monnet University Medical Faculty Jacques Lisfranc<br>LEBEAU, Jean-Pierre; Faculté de médecine de Tours, General Practice ; French National College of Teachers in General Practice, Research<br>Camus, Vincent; CHRU Tours<br>El-Hage, Wissam; CHRU Tours<br>Angoulvant, Denis; CHRU Tours<br>Caille, Agnès; INSERM U1415, CIC Tours<br>Guillon-Grammatico, Leslie; CHRU Tours<br>Laurent, Emeline; CHRU Tours<br>Saint-Lary, Olivier; Paris-Saclay University<br>Boussageon, Rémy; Université de Poitiers, Department of General Medicine<br>Pouchain, Denis; Tours University, General Practice; French National Teachers in General Practice, Research<br>Giraudeau, Bruno; INSERM U1246, ; |
| <b>Primary Subject Heading</b>: | General practice / Family practice                                                                                                                                                                                                                                                                                                                                                                                                                                                                                                                                                                                                                                                                                                                                                                                                                                                                                                                                                                                                                                                                                                                                                                                                                                                                                                                                                                                                                                                                                                               |
| Secondary Subject Heading:      | Cardiovascular medicine, Mental health                                                                                                                                                                                                                                                                                                                                                                                                                                                                                                                                                                                                                                                                                                                                                                                                                                                                                                                                                                                                                                                                                                                                                                                                                                                                                                                                                                                                                                                                                                           |

1  
2  
3  
4  
5  
6  
7  
8  
9  
10  
11  
12  
13  
14  
15  
16  
17  
18  
19  
20  
21  
22  
23  
24  
25  
26  
27  
28  
29  
30  
31  
32  
33  
34  
35  
36  
37  
38  
39  
40  
41  
42  
43  
44  
45  
46  
47  
48  
49  
50  
51  
52  
53  
54  
55  
56  
57  
58  
59  
60

|           |                                             |
|-----------|---------------------------------------------|
| Keywords: | COVID-19, PRIMARY CARE, PREVENTIVE MEDICINE |
|           |                                             |

SCHOLARONE™  
Manuscripts

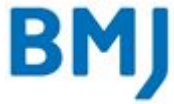

I, the Submitting Author has the right to grant and does grant on behalf of all authors of the Work (as defined in the below author licence), an exclusive licence and/or a non-exclusive licence for contributions from authors who are: i) UK Crown employees; ii) where BMJ has agreed a CC-BY licence shall apply, and/or iii) in accordance with the terms applicable for US Federal Government officers or employees acting as part of their official duties; on a worldwide, perpetual, irrevocable, royalty-free basis to BMJ Publishing Group Ltd ("BMJ") its licensees and where the relevant Journal is co-owned by BMJ to the co-owners of the Journal, to publish the Work in this journal and any other BMJ products and to exploit all rights, as set out in our [licence](#).

The Submitting Author accepts and understands that any supply made under these terms is made by BMJ to the Submitting Author unless you are acting as an employee on behalf of your employer or a postgraduate student of an affiliated institution which is paying any applicable article publishing charge ("APC") for Open Access articles. Where the Submitting Author wishes to make the Work available on an Open Access basis (and intends to pay the relevant APC), the terms of reuse of such Open Access shall be governed by a Creative Commons licence – details of these licences and which [Creative Commons](#) licence will apply to this Work are set out in our licence referred to above.

Other than as permitted in any relevant BMJ Author's Self Archiving Policies, I confirm this Work has not been accepted for publication elsewhere, is not being considered for publication elsewhere and does not duplicate material already published. I confirm all authors consent to publication of this Work and authorise the granting of this licence.

1  
2  
3 **Impact of a phone-call with a medical student/general practitioner team on morbidity of**  
4 **chronic patients during the first French COVID-19 lockdown.**  
5  
6

7  
8 **COVIQuest: A cluster randomised trial**  
9

10  
11 Dibao-Dina Clarisse<sup>1,2</sup> (ORCID n° 0000-0002-1750-2846), Léger Julie<sup>3</sup>, Ettori-Ajasse  
12 Isabelle<sup>2,4</sup>, Boivin Estelle<sup>3</sup>, Chambe Juliette<sup>5</sup>, Abou-Mrad-Fricquegnon Karim<sup>2</sup>, Sun Sophie<sup>6</sup>,  
13 Jego Maeva<sup>7</sup>, Motte Baptiste<sup>8</sup>, Chiron Benoit<sup>9</sup>, Sidorkiewicz Stéphanie<sup>10</sup>, Khau Cam-Anh<sup>11</sup>,  
14 Bouchez Tiphanie<sup>12</sup>, Ghali Maria<sup>13</sup>, Bruel Sébastien<sup>14</sup>, Lebeau Jean-Pierre<sup>2,4</sup>, Camus Vincent<sup>15</sup>,  
15 El-Hage Wissam<sup>15</sup>, Angoulvant Denis<sup>16</sup>, Caille Agnès<sup>1,3</sup>, Grammatico-Guillon Leslie<sup>17</sup>,  
16 Laurent Emeline<sup>17</sup>, Saint-Lary Olivier<sup>18</sup>, Bousageon Rémy<sup>19</sup>, Pouchain Denis<sup>2</sup>, Giraudeau  
17 Bruno<sup>1,3</sup> and the COVIQuest group  
18  
19  
20  
21  
22  
23  
24  
25  
26

27  
28 <sup>1</sup> University of Tours, University of Nantes, INSERM, SPHERE U1246, Tours, France  
29

30  
31 <sup>2</sup> Department of General Practice, University of Tours, Tours, France  
32

33  
34 <sup>3</sup> INSERM CIC1415, CHRU of Tours, Tours, France  
35

36  
37 <sup>4</sup> Equipe Education, Ethique, Santé, EA7505, University of Tours, Tours, France  
38

39  
40 <sup>5</sup> Department of General Practice, University of Strasbourg, Strasbourg, France  
41

42  
43 <sup>6</sup> CUMG Lyon ; Research on Healthcare Performance (RESHAPE), INSERM U1290, Lyon  
44

45  
46 <sup>7</sup> Aix Marseille Univ, Department of general practice, CEReSS - Health Services Research and  
47 Quality of life Center, Marseille, France  
48

49  
50  
51 <sup>8</sup> Faculty of Medicine in Catholic Institute of Lille, Department of general practice , Lille ,  
52 France  
53

54  
55  
56 <sup>9</sup> Department of General Practice, University of Brest, Brest, France  
57

58  
59 <sup>10</sup> Department of General Practice, Paris Descartes University, Paris, France  
60

1  
2  
3 <sup>11</sup> Department of General Practice, University Paris 13, Sorbonne Paris Cité, Bobigny, France  
4  
5

6 <sup>12</sup> Department of General Practice, Côte d'Azur University, RETINES, HEALTHY, Nice,  
7  
8 France.  
9

10  
11 <sup>13</sup> Department of General Practice, Angers University, Angers, France  
12

13  
14 <sup>14</sup> Department of General Practice, Jacques Lisfranc Faculty of Medicine, RESHAPE, Saint-  
15  
16 Etienne-Lyon University, Saint-Etienne, France  
17

18  
19 <sup>15</sup> UMR 1253, University of Tours, CHRU of Tours, Inserm, Tours, France  
20

21  
22 <sup>16</sup> EA4245 T2i, University of Tours, CHRU of Tours, Tours, France  
23

24  
25 <sup>17</sup> EpiDcliC, University of Tours, CHRU of Tours, Tours, France  
26

27  
28 <sup>18</sup> Centre de Recherche en Épidémiologie et de Santé des Populations , University of Paris-Sud,  
29  
30 UVSQ, INSERM U1018, University Paris-Saclay , Villejuif , France  
31

32  
33 <sup>19</sup> Department of General Practice, UMR 5558, LBBE CNRS, University Claude Bernard Lyon  
34  
35 1, Lyon, France.  
36  
37

38  
39  
40  
41  
42 Correspondance to: Clarisse Dibao-Dina  
43  
44 Département Universitaire de Médecine Générale  
45  
46 Faculté de Médecine – Université de Tours  
47  
48 10 Boulevard Tonnellé, B.P. 3223  
49  
50 37044 Tours cedex 1 - France  
51  
52  
53  
54 Tel: +33 2 47 36 60 19  
55  
56 Email: clarisse.dibao-dina@univ-tours.fr  
57  
58  
59  
60

## **ABSTRACT**

**Objectives:** The first COVID-19 lockdown led to significantly reduced access to healthcare, which may have increased decompensations for frail patients with chronic diseases, especially older patients living with a chronic cardiovascular disease (CVD) or a mental health disorder (MHD). The COVIQuest objective was to evaluate whether a general practitioner (GP)-initiated phone call to CVD and MHD patients during the COVID-19 lockdown could reduce the number of hospitalisation(s) over a 1-month period.

**Design:** A cluster randomised controlled trial. Clusters were GPs from 8 French regions.

**Participants:** Patients  $\geq 70$  years old with chronic CVD (COVIQuest\_CV subtrial) or  $\geq 18$  years old with an MHD (COVIQuest\_MH subtrial).

**Interventions:** A standardized GP-initiated phone call aiming to evaluate patients' need for urgent healthcare. The control group benefited from usual care (ie, the contact with the GP was by the patient's initiative).

**Main outcome measures:** Hospital admission within 1 month after the phone call.

**Results:** In the COVIQuest\_CV subtrial, 131 GPs and 1834 patients were included in the intervention group and 136 GPs and 1510 patients were allocated to the control group. Overall, 65 (3.54%) patients were hospitalised in the intervention group versus 69 (4.57%) in the control group (odds ratio 0.82, 95% confidence interval [CI] 0.56 to 1.20; risk difference -0.77, 95% CI -2.28 to 0.74). In the COVIQuest\_MH subtrial, 136 GPs and 832 patients were included in the intervention group and 131 GPs and 548 patients were allocated to the control group. Overall, 27 (3.25%) patients were hospitalised in the intervention group versus 12 (2.19%) in the control group (odds ratio 1.52, 95% CI 0.82 to 2.81; risk difference 1.38, 95% CI 0.06 to 2.70).



1  
2  
3 **Conclusions:** A GP-initiated phone call may have been associated with more hospitalisations  
4 within 1 month for MHD patients, but results lack robustness and significance depending on  
5 the statistical approach used.  
6  
7  
8  
9

10 **Trial registration** NCT04359875 (ClinicalTrials.gov)  
11  
12

13 **Funding** The University Hospital of Tours Endowment Fund  
14  
15  
16  
17  
18  
19  
20  
21  
22  
23  
24  
25  
26  
27  
28  
29  
30  
31  
32  
33  
34  
35  
36  
37  
38  
39  
40  
41  
42  
43  
44  
45  
46  
47  
48  
49  
50  
51  
52  
53  
54  
55  
56  
57  
58  
59  
60

For peer review only

## **SUMMARY BOXES**

### ***Strengths and limitations of this study***

There was a lot of missing data on the primary outcome because of the vagaries of telephone collection; however, missing data will be completed with data collection from the national health insurance when available.

The absence of blinding due to the very nature of the intervention and the shorter time between the intervention and the primary outcome collection may have led to an underestimation of the intervention effect.

In total, 149 GPs included 10,275 patients during 1 month in the COVIQuest trial.

By randomising the order of patients receiving the intervention, all patients could receive a medical phone call in accordance with the Ministry of Health recommendations while we evaluated the impact of the intervention.

## Introduction

The covid-19 pandemic grew exponentially in Europe since January 2020<sup>1-2</sup>. Given the fast-growing case fatality rate in Italy, lockdown measures were decided in several European countries to limit the spread of the virus. These lockdown measures were set in France on March 17, 2020, as the epidemic curve for the period February 23 to March 9, 2020 yielded the best fit for exponential growth as compared with Italy, Germany and Spain<sup>3</sup>. Lockdown measures limited people from urban travel including seeking healthcare because the government announced on March 23, 2020 that only travel for "urgent care or care that respond to a summons from a doctor" were allowed<sup>4</sup>. This measure significantly reduced patients' access to care. Indeed, in France, access to care (except for serious emergencies) is primarily through the GP, especially access to specialists.

Following this announcement, the number of consultations with general practitioners (GPs) was notably decreased in France<sup>5</sup>. Communication on lockdown and protection measures against the spread of the SARS-CoV-2 virus targeted more specifically patients with chronic diseases and over age 75 years, who were considered at increased risk of severe covid-19<sup>6</sup>. Furthermore, an exemption was granted to community pharmacies to deliver an extra month of usual prescriptions for patients with chronic diseases without the need to contact their GP<sup>7</sup>. As a consequence, even patients with regular follow-up for one or more chronic disease(s) stopped consulting/contacting their GP in massive numbers. People requiring regular monitoring to detect certain decompensations of their chronic disease no longer consulted their GP. Teleconsultations were generalized but were at the time scarcely used because of lack of such practice by the general population, especially for older people<sup>5</sup>. This decrease in consultations in general practice may constitute an underuse of care, leading to delayed diagnosis and treatment of serious diseases in the short and medium term but also decompensation of chronic

1  
2  
3 diseases<sup>8</sup>. This underuse of care could lead to excess morbidity and mortality in this population,  
4 indirectly linked to the covid-19 epidemic<sup>5</sup>.  
5  
6  
7

8 Two populations are particularly at risk of decompensation. Patients  $\geq 70$  years old with a  
9 chronic cardiovascular disease (CVD) are at risk of decompensation, with severe cardiovascular  
10 events such as stroke, myocardial infarction, heart failure or death without a regular medical  
11 follow-up<sup>8</sup>. This follow-up is usually performed by the GP<sup>9</sup>. A first hypothesis was that  
12 underuse of care induced by strict lockdown measures may have led to ignoring symptoms  
13 possibly indicating a major cardiovascular event. A second hypothesis was that patients living  
14 with a chronic mental health disorder (MHD) may be particularly at risk of decompensation  
15 secondary to the lockdown measure, which could increase their anxiety and risk of suicide. The  
16 exemption granted to the pharmacist to deliver the patient's usual treatment for an extra month  
17 without consulting the GP may have favoured the abuse of drugs, especially psychotropic,  
18 hypnotics and substitute drugs. The situation could lead to drug dependence and then  
19 withdrawal syndromes at the end of the lockdown, increased risk of hospitalisations and death.  
20 We chose patients with a chronic CVD or MHD because we were afraid that they may be part  
21 of the populations in which the reduction of primary care contact during the lockdown could be  
22 the largest, as was shown later in the literature<sup>10</sup>; there was no proof to ascertain whether these  
23 reductions reflected changes in disease frequency or missed opportunities for care<sup>10</sup>  
24  
25  
26  
27  
28  
29  
30  
31  
32  
33  
34  
35

36 In France, patients with a chronic CVD or MHD are regularly followed by the GP, and contact  
37 with their GP is traditionally according to the patient's initiative. On April 8, 2020, because of  
38 the underuse of care, the French government recommended that GPs directly contact their  
39 patients with chronic disease to prevent decompensation<sup>11</sup>.  
40  
41  
42  
43  
44  
45  
46  
47  
48  
49  
50  
51  
52  
53  
54

55 The development of the COVIQuest project in this context was the opportunity to apply the  
56 recommendations of the French government to patients while meeting the research objective:  
57  
58  
59  
60

1  
2  
3 to assess the impact of a GP-initiated phone call to patients with a CVD or MHD on hospital  
4  
5 admissions within 1 month after the phone call.  
6  
7  
8  
9  
10  
11  
12  
13  
14  
15  
16  
17  
18  
19  
20  
21  
22  
23  
24  
25  
26  
27  
28  
29  
30  
31  
32  
33  
34  
35  
36  
37  
38  
39  
40  
41  
42  
43  
44  
45  
46  
47  
48  
49  
50  
51  
52  
53  
54  
55  
56  
57  
58  
59  
60

For peer review only

## Methods

### *Study design*

The COVIQuest trial consisted of two simultaneous subtrials (although only one randomisation took place; see *Randomisation and masking* section): the COVIQuest\_CV for patients with a CVD and COVIQuest\_MH for patients with an MHD. Both subtrials were open-label, two-parallel group 1:1, cluster randomised trials with clusters defined as GPs.

Because each patient included in the trial had to benefit from the intervention, as recommended by the French government on April 8, 2020<sup>11</sup>, the COVIQuest study used a wait-list control design with GPs randomised to call their CVD patients first (group A) or their MHD patients first (group B). With such a procedure, each GP participated in the two subtrials: those allocated to the intervention group for the subtrial focusing on CVD patients actually formed the control group for the subtrial focusing on MHD patients and vice versa (Figure 1).

Figure 1. COVIQuest design

The timeline of each subtrial<sup>12</sup> is in Figure 2.

Figure 2: Timeline of the COVIQuest\_CV and COVIQuest\_MH sub-trials

### *Participants: GPs and patients*

Eligible GPs were volunteer GPs practising as training supervisors from 8 different administrative regions in France, including 11 academic sites (see Appendix 1), who had medical trainees and a dedicated time to call patients. To identify patients with a chronic

1  
2  
3 disease, we chose the *affection longue durée* (ALD) system. The ALD system allows for  
4 financial coverage by the national health insurance for pathologies that require prolonged and  
5 costly treatment. Each patient's GP declares the ALD and thus has access to their list of ALD  
6 patients.  
7  
8  
9  
10

11  
12 CVD patients were  $\geq 70$  years old with a chronic CVD as referenced in the long-term illness  
13 list (*Affection longue durée* [ALD], i.e., with ALD no. 1, 3, 5, 12, 13; details in Appendix 2)  
14 and regularly followed by their GP (i.e., in the list of patients followed by a GP as referenced  
15 in the French health insurance database). MHD patients were  $\geq 18$  years old with an MHD  
16 referenced as no. 23 in the ALD. Patients with both a cardiovascular ALD and a mental health  
17 ALD or for whom their GP considered their participation in the trial as inappropriate for any  
18 reason were not contacted. All participants or their family members or legally authorised  
19 representatives were provided with information about the trial, and oral informed consent was  
20 obtained at the beginning of the phone call before recruitment.  
21  
22  
23  
24  
25  
26  
27  
28  
29  
30  
31  
32

### 33 ***Randomisation and masking***

34  
35  
36 Randomisation units were GPs. If several eligible GPs were working at the same practice, they  
37 were all allocated to the same group. GPs were randomised all at once. The randomisation  
38 sequence was centrally generated by a statistician not involved in the GP or patient recruitment,  
39 who used permuted blocks of variable size. A stratified randomisation on regions was used to  
40 allocate GPs in a 1:1 ratio to group A (CVD patients called first) or group B (MHD patients  
41 called first). After screening their eligible patients (both CVD and MHD patients) for  
42 recruitment (see *Procedures* section), GPs received the randomisation sequence from the  
43 central trial-coordinating team, which ensured concealment of allocation.  
44  
45  
46  
47  
48  
49  
50  
51  
52  
53  
54

55  
56 There was no possible blinding in the present trial because of the nature of the intervention.  
57  
58  
59  
60

### ***Interventions***

Interventions were the same in the two simultaneous subtrials. Patients recruited in the intervention arm benefited from a GP-initiated phone call by the GP or his/her medical trainee as a representative of the GP. This phone call was standardized with three questions: How are you doing? (response on a Likert scale from 0, very bad to 10, very well). Would you have made an appointment with your GP if there had not been covid-19 epidemic and lockdown? (response Yes/No) Would you like an appointment with your doctor? (response Yes/No) (see Appendix 3). In view of the answers to these three questions, the GP decided whether to propose a consultation or teleconsultation to the patient, taking into account the patient's medical background.

Patients in the control group initially benefited from usual care. When they were called to report the primary outcome within 1 month after the initiation of the trial (see *Outcomes* section), they also benefited from the intervention because they were asked the same three questions as for the intervention group, and once again were re-contacted by their GP if deemed necessary. Therefore, the COVIQuest study was a wait-list trial.

### ***Procedures (Figure 2)***

GPs were asked to identify eligible CVD and MHD patients and to alphabetically order them. Then GPs were randomised all at once to group A or B. GPs allocated to group A had to call their CVD patients first at the beginning of the trial and then call their MHD patients after 1 month at the same time they collected the primary outcome (see *Outcomes* section). For GPs allocated to group B, MHD patients were called first, then CVD patients 1 month later. When GPs were allocated to groups A and B, they were also randomly allocated to one of the 26 alphabet letters. They had to phone patients on the list, beginning with the letter to which they had been allocated. One month later, all CVD and MHD patients were called to assess the



1  
2  
3 primary outcome (see *Outcomes* section). Again, both for CVD and MHD patients, the order  
4 by which these patients were called was alphabetic, starting at the letter to which the GP had  
5 been randomly allocated. During the same phone call, for GPs allocated to group A, the  
6 intervention was also delivered to MHD patients; and for GPs allocated to group B, the  
7 intervention was also delivered to CVD patients.  
8  
9  
10  
11  
12  
13  
14

### 15 ***Outcomes***

16  
17  
18 The primary outcome was the occurrence of at least one hospitalisation within 1 month after  
19 GP randomisation. It was patient self-reported and assessed by a phone call from the GP or  
20 his/her medical trainee to the patient 1 month after the practice had been randomised.  
21  
22 Hospitalisation details (date, location, length and reason, if available) were collected. The  
23 primary outcome was the same for the two subtrials.  
24  
25  
26  
27  
28  
29

30 Secondary outcomes at 1 month were the proportion of patients for whom the practitioner had  
31 to call back after the medical trainee had phoned (in the intervention group only) and mortality  
32 (with cause of death) over the 1-month period after randomisation.  
33  
34  
35  
36  
37

38 Secondary outcomes at 6 months were collected from electronic health records (national health  
39 insurance data; Système National des Données de Santé [SNDS]): mortality over the 6 months;  
40 number and date of GP consultations and teleconsultations; number and date of consultations  
41 with another specialist; number of prescriptions related to the chronic disease that were  
42 dispensed by the pharmacy; number, date and reason for hospitalisations; cardiovascular events  
43 for COVIQuest\_CV subtrial (MACE4: nonfatal stroke, nonfatal myocardial infarction,  
44 cardiovascular death and hospitalisation for heart failure); and psychotropic drug consumption  
45 for the COVIQuest\_MH subtrial. Because of a data collection time interval, these data are not  
46 collected yet and will be reported subsequently.  
47  
48  
49  
50  
51  
52  
53  
54  
55  
56  
57  
58  
59  
60

### *Statistical analyses*

There were no data available to formulate hypotheses for the sample size. Therefore, all eligible GPs volunteering to participate were recruited (i.e., at least 200 GPs were expected to be recruited). However, considering that the mean number of eligible patients per GP was expected to be about 80 for CVD patients and 30 for MHD patients<sup>13</sup>, approximately 16,000 CVD and 6,000 MHD participants were possible. With such sample sizes, we expected to detect a difference of 5% versus 3% of events with power of 90% for CVD patients and 78% for MHD patients, considering a two-sided Type I error rate of 5%, a 0.5 coefficient of variation for cluster size, and an intraclass correlation coefficient (ICC) of 0.03 (i.e., the median value observed in Campbell et al.<sup>14</sup>).

Statistical analyses were conducted by keeping all patients who agreed to be included in the group to which their GP had been allocated to. For the primary outcome, missing data were considered as no hospitalisation, whatever the study group. A multiple imputation strategy was considered impossible because of the absence of participant baseline data (except for age and sex). A sensitivity analysis was conducted for participants without a missing primary outcome (completers analysis). Another sensitivity analysis was performed, adjusting on sex and age. The level of statistical significance was set to 5%.

For the primary outcome analysis, a marginal approach was used by fitting a logistic regression model within a generalized estimating equation framework with a robust variance estimator and considering a compound symmetry correlation structure. This model accounted for clustering at the GP level. All analyses were adjusted on region (stratification variable). Clustering at the practice level was not taken into account, which limited our models to two-level hierarchical models with patients embedded in GPs only. A risk difference was also estimated by using an identity link function. Of note, for MHD patients, the logistic model did not take into account

1  
2  
3 the stratification variable because of convergence problems. ICCs were estimated per group by  
4  
5 using the ANOVA estimator.  
6  
7

8 For the secondary outcome analysis, the proportion of patients for whom the GP had to call  
9  
10 back after the medical trainee call (in the intervention group) was estimated. The confidence  
11  
12 interval was corrected to take into account clustering. For that, a corrected variance was used,  
13  
14 taking into account the ICC estimate associated with the intervention group<sup>15</sup>. Mortality rates  
15  
16 were reported without any statistical analysis owing to the small number of events.  
17  
18

19  
20 All analyses were conducted with SAS 9.4.  
21  
22

### 23 ***Ethics and dissemination***

24  
25  
26 The study protocol was approved by the ethics committee of CPP Sud-Méditerranée 3, no.  
27  
28 2020.04.21 ter\_ 20.04.17.42325. The French committee for data handling (CNIL) approved the  
29  
30 study (no. 920185 dated 30 of April 2020). This trial was registered with ClinicalTrials.gov  
31  
32 (NCT04359875).  
33  
34  
35  
36  
37  
38  
39  
40  
41  
42  
43  
44  
45  
46  
47  
48  
49  
50  
51  
52  
53  
54  
55  
56  
57  
58  
59  
60

## Results

### *Trial profiles*

Of 267 selected GPs across 8 different French areas, 149 from 125 practices identified 10,275 patients: 6873 CVD patients and 3402 MHD patients. A total of 3,344 CVD patients and 1,380 MHD patients were included (Figure 3).

Figure 3: Trial flow chart for the COVIQuest\_CV and COVIQuest\_MH subtrials

### *Physicians and patients baseline characteristics (Table 1)*

GPs were younger in group B than group A. They were more frequently practicing medicine in multidisciplinary healthcare centres (n=38, 49.3% and n=28, 39.0% in group B and A) and/or territorial professional health communities (n=38, 49.3% and n=30, 41.7%, respectively) and/or with the help of an advanced health nurse (n=19, 24.7% and n=12, 16.7%, respectively).

Patients' baseline data from the COVIQuest\_CV and COVIQuest\_MH subtrials were comparable between the intervention and the control groups (Table 1).

Complete baseline data for GPs are in supplementary files (Appendix 4).

Table 1. Baseline general practitioners and patients characteristics

| Baseline characteristics of general practitioners (GPs) by group*                  |                                                  |                                             |
|------------------------------------------------------------------------------------|--------------------------------------------------|---------------------------------------------|
|                                                                                    | <b>Group A</b><br><b>(n<sub>1</sub>=72)</b>      | <b>Group B</b><br><b>(n<sub>2</sub>=77)</b> |
| <b>Mean (standard deviation); median</b>                                           | 49.9 (11.9)                                      | 43.3 (10.3)                                 |
| <b>(interquartile range) age (years)</b>                                           | 49.0 (38.0–60.5)                                 | 39.0 (35.0–53.0)                            |
| <b>Sex: male</b>                                                                   | 32 (44.4)                                        | 30 (39.0)                                   |
| Baseline characteristics of CVD and MHD patients by group: intervention or control |                                                  |                                             |
|                                                                                    | <b>Intervention group</b><br><b>(phone call)</b> | <b>Control group</b>                        |
| CVD patients                                                                       | (n=1834)                                         | (n=1510)                                    |
| <b>Mean (standard deviation); median</b>                                           | 79.9 (6.9)                                       | 79.8 (7.2)                                  |
| <b>(interquartile range) age (years)</b>                                           | 80.0 (74.0–85.0)                                 | 80.0 (74.0–85.0)                            |
| <b>Sex: male</b>                                                                   | 1056 (57.6)                                      | 878 (58.1)                                  |
| MHD patients                                                                       | (n=832)                                          | (n=548)                                     |
| <b>Mean (standard deviation); median</b>                                           | 53.2 (14.2)                                      | 53.4 (16.1)                                 |
| <b>(interquartile range) age (years)</b>                                           | 53.0 (44.0–63.0)                                 | 54.0 (41.0–64.5)                            |
| <b>Sex: male</b>                                                                   | 298 (35.8)                                       | 203 (37.0)                                  |

\*Group A (cardiovascular disease [CVD] patients called first); group B (mental health disorder [MHD] patients called first).

Values are numbers (percentages) unless stated otherwise.

## ***Results for CVD patients***

### ***Timeline adherence***

In 80.4% of cases (n=1448/1834), the medical trainee initiated the intervention phone call as a representative of the GP. In the intervention group, the median time between the beginning of the trial on April 30, 2020 and the intervention phone call was 12 days (interquartile range 5 to 15). Then, pooling the two groups, the median time between April 30, 2020 and date of outcome assessment was 47 days (interquartile range 41 to 53). Results per group are in supplementary files (Appendix 5, table 1).

### ***Information gathered by phone calls***

The proportion of patients who had a consultation with their physician since the beginning of the lockdown was 46.6% (n=851/1825) and 81.8% (n=1159/1417) in the intervention and control groups. The perceived health status was similar in the intervention and control groups, with a mean (SD) score on the 0-10 Likert scale of 7.4 (1.8) and 7.3 (1.9), respectively. At the end of the phone call, 33.4% (n=611/1828) and 20.5% (n=308/1500) of patients in the intervention and control groups wanted an appointment with their GP. Details on information gathered by the intervention phone call are in supplementary files (Appendix 5, tables 2, 3 and 4).

### ***Primary and secondary 1-month outcome results (Table 2)***

In the COVIQuest\_CV subtrial, missing information on the primary outcome was imputed as no hospitalisation for 348 (19.0%) participants in the intervention group and 39 (2.6%) in the control group. Thus considering the full dataset, overall, 65/1834 (3.54%) patients from the intervention group had a hospital admission within 1 month after randomisation versus 69/1510 (4.57%) in the control group (odds ratio 0.82, 95% confidence interval (CI) 0.56 to 1.20; risk difference -0.77, 95% CI -2.28 to 0.74) (Table 2).

Table 2. COVIQuest\_CV subtrial comparison of hospitalisations within 1 month

|                            | Hospitalisations                       |                         | OR (95%CI)*         | Risk difference       | ICC (95%CI)                            |                            |
|----------------------------|----------------------------------------|-------------------------|---------------------|-----------------------|----------------------------------------|----------------------------|
|                            | n (%)                                  |                         | p-value             | (95%CI)*              |                                        |                            |
|                            | A – Intervention<br>group (phone call) | B – Control<br>group    |                     | p-value               | A – Intervention<br>group (phone call) | B – Control group          |
|                            | (n <sub>1</sub> = 1834)                | (n <sub>2</sub> = 1510) |                     |                       |                                        |                            |
| <b>Full dataset</b>        | 65 (3.54)                              | 69 (4.57)               | 0.82 (0.56 to 1.20) | -0.77 (-2.28 to 0.74) | -0.004 (-0.011 to<br>0.009)            | 0.012 (-0.017 to<br>0.035} |
| <b>Adjusted analysis**</b> |                                        |                         | 0.82 (0.56 to 1.20) | -0.77 (-2.28 to 0.74) |                                        |                            |
|                            |                                        |                         | 0.310               | 0.319                 |                                        |                            |
| <b>Completers***</b>       | 65/1486 (4.37)                         | 69/1471 (4.69)          | 0.99 (0.68 to 1.43) | -0.06 (-1.66 to 1.54) | -0.003 (-0.011 to<br>0.014)            | 0.011 (-0.002 to<br>0.035} |
|                            |                                        |                         | 0.943               | 0.941                 |                                        |                            |

\* Adjustment on region

1  
2  
3 \*\* Adjustment on region, age and sex  
4

5  
6 \*\*\* Missing data were considered as no hospitalisation  
7

8  
9 OR, odds ratio; 95% CI, 95% confidence interval; ICC, intraclass correlation coefficient  
10

11  
12  
13  
14  
15  
16  
17  
18  
19  
20  
21  
22  
23  
24  
25  
26  
27  
28  
29  
30  
31  
32  
33  
34  
35  
36  
37  
38  
39  
40  
41  
42  
43  
44  
45  
46

For peer review only



1  
2  
3 Among hospitalisations, 14/64 (21.9%) were for a cardiovascular cause in the intervention  
4 group versus 23/70 (32.9%) in the control group. Details on causes of hospitalisations are in  
5 supplemental files (Appendix 5, table 5). The number of deaths were 3/1523 (0.2%) in the  
6 intervention group and 0/1510 in the control group (no statistical test performed). Finally, in  
7 the intervention group, 670/1622 (41.3%) patients were recalled by their GP after the trainee  
8 intervention phone call to adapt their care.  
9  
10  
11  
12  
13  
14  
15  
16  
17  
18  
19  
20  
21  
22  
23  
24  
25  
26  
27  
28  
29  
30  
31  
32  
33  
34  
35  
36  
37  
38  
39  
40  
41  
42  
43  
44  
45  
46  
47  
48  
49  
50  
51  
52  
53  
54  
55  
56  
57  
58  
59  
60

For peer review only

## ***COVIQuest\_MH subtrial results***

### ***Timeline adherence***

In 715/814 (87.8%) of cases, the intervention phone call was made by the medical trainee as a representative of the GP. The median time from the beginning of the trial to the intervention phone call in the intervention group was 7 days (interquartile range 5 to 14). The median time from April 30, 2020 to the first phone call in the control group (i.e., the outcome assessment phone call after a 1-month delay) was 49 days (interquartile range 42 to 56). Results per group are in supplementary files (Appendix 6, table 1).

### ***Information gathered by phone calls***

The proportion of patients who already had a consultation with their physician after the beginning of the lockdown was 48.0% (n=393/819) and 67.2% (367/546) in the intervention and control groups. The perceived health status was similar in the intervention and the control groups, with a median (SD) score on the 0-10 Likert scale at 1 month of 7.1 (2.2) and 7.1 (2.0), respectively. At the end of the phone call, 36.6% (302/826) and 29.1% (158/542) of patients in the intervention and control groups sought an appointment with their GP. Details on information gathered by the intervention phone call are in supplementary files (Appendix 6, tables 2, 3 and 4).

### ***Primary and secondary 1-month outcomes (Table 3)***

In the COVIQuest\_MH subtrial, missing information on the primary outcome was imputed as no hospitalisation for 282 (33.9%) participants in the intervention group and 48 (8.8%) in the control group. Thus considering the full dataset, the primary outcome occurred in 27/832 (3.25%) and 12/548 (2.19%) patients in the intervention and control groups (odds ratio 1.52, 95% CI 0.82 to 2.81; risk difference 1.38 95% CI 0.06 to 2.70) (Table 3).

Table 3. COVIQuest\_MH subtrial comparison of hospitalisations within 1 month.

|                            | Hospitalisations                            |                                                                  | OR (*) (95%CI)               | Risk difference (*)          | ICC (95%CI)                |                                        |
|----------------------------|---------------------------------------------|------------------------------------------------------------------|------------------------------|------------------------------|----------------------------|----------------------------------------|
|                            | A – Control group<br>(n <sub>1</sub> = 548) | B – Intervention<br>group (phone call)<br>(n <sub>2</sub> = 832) | p-value                      | (95%CI)<br>p-value           | A – Control group          | B – Intervention<br>group (phone call) |
| <b>Full dataset</b>        | 12 (2.19)                                   | 27 (3.25)                                                        | 1.52 (0.82 to 2.81)<br>0.180 | 1.38 (0.06 to 2.70)<br>0.040 | 0.014 (-0.017 to<br>0.067) | 0.002 (-0.018 to<br>0.036)             |
| <b>Adjusted analysis**</b> |                                             |                                                                  | 1.52 (0.82 to 2.81)<br>0.179 | 1.38 (0.07 to 2.68)<br>0.038 |                            |                                        |
| <b>Completers***</b>       | 12/500 (2.40)                               | 27/550 (4.91)                                                    | 2.14 (1.15 to 3.99)<br>0.017 | 2.79 (0.80 to 4.78)<br>0.006 | 0.012 (-0.020 to<br>0.068) | 0.018 (-0.016 to<br>0.074)             |

\* Adjustment on region

1  
2  
3 \*\* Adjustment on region, age and sex  
4

5  
6 \*\*\* Missing data were considered as no hospitalisation  
7

8  
9 OR, odds ratio; 95% CI, 95% confidence interval; ICC, intraclass correlation coefficient  
10  
11  
12  
13  
14  
15  
16  
17  
18  
19  
20  
21  
22  
23  
24  
25  
26  
27  
28  
29  
30  
31  
32  
33  
34  
35  
36  
37  
38  
39  
40  
41  
42  
43  
44  
45  
46

For peer review only

1  
2  
3 Hospitalisations were for a mental health emergency (including suicide attempt): 8/26 (30.8%)  
4  
5 versus 4/13 (30.8%) in the intervention and control groups. Details on causes of hospitalisations  
6  
7 are in supplementary files (Appendix 6, table 5). The number of deaths was 2/570 (0.35%) in  
8  
9 and 0/548 in the intervention and control groups (no statistical test performed).  
10  
11

12  
13 Finally, in the intervention group, 188/621 (30.3%) patients were re-called by their GP after the  
14  
15 trainee's intervention phone call to adapt their care.  
16  
17

18  
19  
20  
21  
22  
23  
24  
25  
26  
27  
28  
29  
30  
31  
32  
33  
34  
35  
36  
37  
38  
39  
40  
41  
42  
43  
44  
45  
46  
47  
48  
49  
50  
51  
52  
53  
54  
55  
56  
57  
58  
59  
60

For peer review only

## Discussion

For CVD patients, patients who were called immediately (intervention group) and those who were called at 1 month (control group) did not differ in number of hospitalisations within 1 month. For MHD patients, the intervention effect expressed as an odds ratio was not statistically significant, but the risk difference in hospitalisations revealed a modest but statistically significant higher rate of hospitalisations in the intervention than control group. This apparent discrepancy is probably due to the inability to consider the region stratification variable when estimating the odds ratio, which may have reduce the power of the statistical analysis.

These COVIQuest first results must be interpreted with caution. First, some randomised GPs did not screen any patients (119 for the COVIQuest\_CV subtrial and 122 for the COVIQuest\_MH subtrial). These empty clusters were discarded from all statistical analyses, which remains a limitation for data interpretation<sup>16</sup>. Other GPs screened control patients but finally did not include them, which led to 10 more empty clusters in the COVIQuest\_CV subtrial and 14 in the COVIQuest\_MH subtrial. Patients were included at day 0 in the intervention group and at month 1 in the control group. Reaching out to patients was more difficult at month 1 than at day 0. Indeed, medical trainees changed internship June 1, 2020, so some did not know the GP or the COVIQuest study and did not participate in the study. Some GPs no longer had a medical trainee from June 1, 2020, which led to a lack of time to call patients. The lockdown ended on May 11, 2020. Therefore, fewer control than intervention patients had been recruited, which led to a possible risk of selection bias occurring in both subtrials. Finally, patients from the intervention group who could not be reached at month 1 had missing data, which were considered absence of hospitalisation in the intervention group (the quasi absence of baseline data impeded considering a multiple imputation approach) but could not be considered so in the control group. All these elements may have biased the intervention effect estimates, which is the main limitation of the trial. However, missing data

1  
2  
3 will be completed by the *Système National des Données de Santé* (SNDS) data collection  
4 performed by the National Health Insurance Caisse Nationale d'Assurance-Maladie, provider  
5 of the SNDS data, and published in an upcoming paper (data not available yet for administrative  
6 delays).  
7  
8  
9  
10

11  
12  
13 Second, the 1-month period between the first (day 1) phone call in the intervention group and  
14 the second (month 1) phone call in the control group was not always respected. When designing  
15 the study, GPs were expected to phone their patients allocated to the intervention group during  
16 the week after the initiation of the study. The study started on April 30, 2020, and therefore we  
17 expected that all day-1 phone calls would have been completed before May 7, 2020. As a result,  
18 month-1 phone calls were expected to take place before June 4, 2020. However, day-1 phone  
19 calls took place between April 30, 2020 and June 8, 2020 for CVD patients and between April  
20 30, 2020 and May 25, 2020 for MHD patients. Therefore, the last month-1 phone call took place  
21 on July 2, 2021 for CVD patients, and on July 3, 2021 for MHD patients. Hence, considering  
22 the 1-month period after randomisation as the observational period of interest would not be  
23 sensible. We decided to consider, for each patient, an observational period defined as the period  
24 between April 30, 2020 and the date of their month-1 phone call. This led to variations in  
25 observational period length between patients. However, there is no reason to consider that the  
26 distributions of these lengths would differ between groups.  
27  
28  
29  
30  
31  
32  
33  
34  
35  
36  
37  
38  
39  
40  
41  
42  
43  
44  
45

46 Third, blinding was not possible in the present trial because of the nature of the intervention.  
47 There is a risk of performance and contamination bias, with GPs allocated to a control group  
48 calling their patients before the planned 1-month delay. Furthermore, information on outcomes  
49 was patient self-reported, thus leading to a possible declaration bias. We could not totally avoid  
50 this risk. However, this performance bias, if present, may have resulted in an underestimation  
51 of the intervention effect, and for declaration bias, information will be confirmed by data from  
52 the national health insurance.  
53  
54  
55  
56  
57  
58  
59  
60

1  
2  
3 Beyond these limitations, including the limited data collected at inclusion for feasibility reasons  
4  
5 in the emergency context, the strength of COVIQuest trial was as both a healthcare and a  
6  
7 research project. This opportunity to conjugate a strategy to detect decompensations in patients  
8  
9 with chronic disease during the lockdown and an evaluation of this strategy with a high level  
10  
11 of evidence motivated 149 GPs to participate with their medical trainees. GPs were all new to  
12  
13 research and signed up for free as investigators, which demonstrates their strong motivation to  
14  
15 improve care and research during the covid-19 pandemic. Another strength was the design of  
16  
17 the protocol allowing all trial participants to benefit from the intervention while maintaining  
18  
19 the experimental design. With a protocol randomising not patients to be called but rather the  
20  
21 order of the patients to be called, each patient participating in the trial received a GP-initiated  
22  
23 phone call to assess their state of health, which agreed with government recommendations<sup>11</sup>.  
24  
25  
26  
27  
28

29 Considering the results of the primary outcome for both the COVIQuest\_CV and  
30  
31 COVIQuest\_MH subtrials, the reasons for those early hospitalisations at 1 month are not fully  
32  
33 known. In the COVIQuest\_CV subtrial, the intervention and control groups did not differ in 1-  
34  
35 month hospitalisation number. This lack of difference could be explained by a lack of power of  
36  
37 the study because the sample size had not been reached particularly because of GP withdrawals.  
38  
39 It could also be explained by an unexpected reduction in incidence of myocardial infarction  
40  
41 during the lockdown period, which led to lack of impact of an under-use of care for CVD  
42  
43 patients. Hypotheses for a truly reduced incidence of myocardial infarction include reduced  
44  
45 triggers such as physical activity or air pollution<sup>17</sup>. The COVIQuest\_MH subtrial showed a  
46  
47 higher 1-month hospitalisation rate in the intervention than control group. This result was the  
48  
49 opposite of the hypothesis that the intervention phone call would result in a reduced  
50  
51 hospitalisation rate. This increase in early hospitalisations for patients with a chronic MHD may  
52  
53 have avoided more complicated or critical issues such as suicides, psychiatric decompensations,  
54  
55 or substance/drug abuse that were particularly frequent in patients living with a chronic MHD  
56  
57  
58  
59  
60



1  
2  
3 during the covid-19 pandemic<sup>18-19</sup>. Data on mortality, hospitalisations, and recourse of care  
4 analyses using the national health insurance at 6 months could give some answers.  
5  
6  
7

8 The lack of differences in hospitalization at 1 month for CVD patients does not allow us to draw  
9 any useful conclusions for practice. For the MHD patients, if the increase in the use of  
10 hospitalisation is confirmed by the 6-month data, the question will be raised as to the relevance  
11 of these hospitalisations and their impact on the morbimortality of these patients. Are these  
12 preventive hospitalisations that have allowed for avoiding more serious decompensations  
13 (which may even lead to suicide) and/or later on? If so, this could lead to a better identification  
14 of people at risk of decompensation to be contacted as a priority. It may also allow for a  
15 rethinking of access to care for these fragile patients, by checking on them. The completeness  
16 of the mortality and morbidity data (consumption of medication, hospitalisations, use of care)  
17 at 6 months after the intervention, which will be provided by the national health insurance, will  
18 enable us to answer this question and will be published as soon as we receive these results.  
19  
20  
21  
22  
23  
24  
25  
26  
27  
28  
29  
30  
31  
32  
33  
34  
35  
36  
37  
38  
39  
40  
41  
42  
43  
44  
45  
46  
47  
48  
49  
50  
51  
52  
53  
54  
55  
56  
57  
58  
59  
60

## Conclusion

A GP-initiated phone call during the first covid-19 lockdown in France may have been associated with increased number of hospitalisations within 1 month in MHD patients. Conversely, this phone call had no significant impact on number of hospitalisations within 1 month in CVD patients.

For peer review only

### **Ethics approval**

The COVIQuest study obtained ethics approval from CPP Sud-Méditerranée 3 (no. 2020.04.21 ter\_20.04.17.42325).

Participants gave oral consent to the medical trainee/general practitioner team before taking part in the study. Consents were recorded in the general practitioner's files.

### **Transparency declaration**

As a lead author, Clarisse Dibao-Dina affirms that the manuscript is an honest, accurate, and transparent account of the study being reported; that no important aspects of the study have been omitted; and that any discrepancies from the study as originally planned (and, if relevant, registered) have been explained.

### **Patient and Public Involvement statement**

Not concerned

### **Contributorship statement**

Each author participated to the study design, revised the work critically for important intellectual content, gave his/her final approval of the version to be published and agreed to be accountable for all aspects of the work in ensuring that questions related to the accuracy or integrity of any part of the work are appropriately investigated and resolved. CDD and BG conceived, planned and conducted the study, interpreted and reported the data. RB and DP participated to the conception of the study and interpretation of the data and critically revised

1  
2  
3 the paper. JL participated to the conception of the study, analysed the data with BG and drafted  
4 the work with CDD and BG. IEA, JC, KAMF, SoS, MJ, BM, BC, StS, CAK, TB, MG, SB and  
5  
6 the COVIQuest group critically discussed the design, participated to the acquisition of data and  
7  
8 reporting of results. EB, JPL, VC, WEH, DA, AC, LGG, EL, OSL participated to the study  
9  
10 design and gave their approval to the interpretation of the data and reporting of the results.  
11  
12  
13  
14  
15  
16

### 17 **Competing interest statement**

18 No competing interest.  
19  
20  
21

### 22 **Funding**

23 University Hospital of Tours Endowment Funds  
24  
25  
26  
27

### 28 **Role of the study sponsor**

29  
30 The COVIQuest study was funded by the University Hospital of Tours Endowment Funds. We  
31 confirm that the sponsor had no role in the study design; in the collection, analysis, and  
32  
33 interpretation of data; in the writing of the report; and in the decision to submit the article for  
34  
35 publication. We also confirm the independence of researchers from funders and that all authors,  
36  
37 external and internal, had full access to all of the data (including statistical reports and tables)  
38  
39 in the study and can take responsibility for the integrity of the data and the accuracy of the data  
40  
41 analysis.  
42  
43  
44  
45  
46  
47  
48  
49  
50

### 51 **Data availability statement**

52 Data are available upon reasonable request.  
53  
54  
55  
56  
57  
58  
59  
60

## References

1. Bernard Stoecklin S, Rolland P, Silue Y, et al.; Investigation Team. First cases of coronavirus disease 2019 (COVID-19) in France: surveillance, investigations and control measures, January 2020. *Euro Surveill.* 2020;25:6.
2. Hodcroft EB. Preliminary Case Report on the SARS-CoV-2 Cluster in the UK, France, and Spain. *Swiss Med Wkly.* 2020;150:9-10.
3. Yuan J, Li M, Lv G, Lu ZK. Monitoring Transmissibility and Mortality of COVID-19 in Europe. *Int J Infect Dis.* 2020;95:311-5.
4. Ministère de la Santé. PRISE EN CHARGE EN VILLE PAR LES MÉDECINS DE VILLE DES PATIENTS SYMPTOMATIQUES EN PHASE ÉPIDÉMIQUE DE COVID-19. 2020 disponible sur: <https://solidarites-sante.gouv.fr/soins-et-maladies/maladies/maladies-infectieuses/coronavirus/professionnels-de-sante/article/en-ambulatoire-recommandations-covid-19-et-prise-en-charge>.
5. Saint-Lary O, Gautier S, Le Breton J, et al. How GPs adapted their practices and organisations at the beginning of COVID-19 outbreak: a French national observational survey. *BMJ Open* 2020;10:e042119.
6. Rimmer A. Covid-19: GPs can stop health checks for over 75s and routine medicine reviews. *BMJ.* 2020;368:m1157.
7. Arrêté du 23 mars 2020 prescrivant les mesures d'organisation et de fonctionnement du système de santé nécessaires pour faire face à l'épidémie de covid-19 dans le cadre de l'état d'urgence sanitaire. Available at : <https://www.legifrance.gouv.fr/affichTexte.do?cidTexte=JORFTEXT000041746744&dateTexte=20200403>.

- 1  
2  
3 8. An J, Zhang Y, Muntner P, Moran AE, Hsu JW, Reynolds K. Recurrent Atherosclerotic  
4  
5 Cardiovascular Event Rates Differ Among Patients Meeting the Very High Risk Definition  
6  
7 According to Age, Sex, Race/Ethnicity, and Socioeconomic Status. *J Am Heart Assoc.* 2020  
8  
9 Dec;9(23):e017310.
- 10  
11  
12  
13 9. Hinton W, McGovern A, Coyle R, Han TS, Sharma P, Correa A, Ferreira F, de Lusignan S.  
14  
15 Incidence and prevalence of cardiovascular disease in English primary care: a cross-  
16  
17 sectional and follow-up study of the Royal College of General Practitioners (RCGP)  
18  
19 Research and Surveillance Centre (RSC). *BMJ Open.* 2018;8(8):e020282.
- 20  
21  
22  
23 10. Mansfield KE, Mathur R, Tazare J, et al. Indirect acute effects of the COVID-19 pandemic  
24  
25 on physical and mental health in the UK: a population-based study. *Lancet Digit Health.*  
26  
27 2021 Apr;3(4):e217-e230.
- 28  
29  
30 11. Ministère de la Santé. Prise en charge hors COVID19. 2020 available at: <https://solidarites->  
31  
32 [sante.gouv.fr/IMG/pdf/soins-hors-covid-19.pdf](https://solidarites-sante.gouv.fr/IMG/pdf/soins-hors-covid-19.pdf).
- 33  
34  
35 12. Caille A, Kerry S, Tavernier E, Leyrat C, Eldridge S, Giraudeau B. Timeline cluster: a  
36  
37 graphical tool to identify risk of bias in cluster randomised trials. *BMJ.* 2016;354:i4291.
- 38  
39  
40 13. Données relatives à l'ensemble des bénéficiaires du dispositif des ALD une année donnée.  
41  
42 2021 available at: [https://www.ameli.fr/l-assurance-maladie/statistiques-et-](https://www.ameli.fr/l-assurance-maladie/statistiques-et-publications/donnees-statistiques/affection-de-longue-duree-ald/prevalence/prevalence-des-ald-en-2019.php)  
43  
44 [publications/donnees-statistiques/affection-de-longue-duree-ald/prevalence/prevalence-](https://www.ameli.fr/l-assurance-maladie/statistiques-et-publications/donnees-statistiques/affection-de-longue-duree-ald/prevalence/prevalence-des-ald-en-2019.php)  
45  
46 [des-ald-en-2019.php](https://www.ameli.fr/l-assurance-maladie/statistiques-et-publications/donnees-statistiques/affection-de-longue-duree-ald/prevalence/prevalence-des-ald-en-2019.php).
- 47  
48  
49 14. Campbell MK, Fayers PM, Grimshaw JM. Determinants of the intracluster correlation  
50  
51 coefficient in cluster randomized trials: the case of implementation research. *Clin Trials.*  
52  
53 2005;2(2):99-107.
- 54  
55  
56  
57 15. Donner A, Klar N. Confidence interval construction for effect measures arising from cluster  
58  
59 randomization trials. *J Clin Epidemiol.* 1993;46(2):123-31.
- 60

- 1  
2  
3 16. Giraudeau B, Ravaud P. Preventing bias in cluster randomised trials. *PLoS Med.*  
4  
5 2009;6(5):e1000065.  
6  
7  
8 17. Mesnier J, Cottin Y, Coste P, et al. Hospital admissions for acute myocardial infarction  
9  
10 before and after lockdown according to regional prevalence of COVID-19 and patient  
11  
12 profile in France: a registry study. *Lancet Public Health.* 2020;5(10):e536-e542.  
13  
14  
15 18. Czeisler MÉ, Lane RI, Petrosky E, et al. Mental Health, Substance Use, and Suicidal  
16  
17 Ideation During the COVID-19 Pandemic - United States, June 24-30, 2020. *MMWR Morb*  
18  
19 *Mortal Wkly Rep.* 2020;69(32):1049-1057.  
20  
21  
22  
23 **19.** Robillard R, Daros AR, Phillips JL, et al. Emerging New Psychiatric Symptoms and the  
24  
25 Worsening of Pre-existing Mental Disorders during the COVID-19 Pandemic: A Canadian  
26  
27 Multisite Study: Nouveaux symptômes psychiatriques émergents et détérioration des  
28  
29 troubles mentaux préexistants durant la pandémie de la COVID-19: une étude canadienne  
30  
31 multisite. *Can J Psychiatry.* 2021:706743720986786.  
32  
33  
34  
35  
36  
37  
38  
39  
40  
41  
42  
43  
44  
45  
46  
47  
48  
49  
50  
51  
52  
53  
54  
55  
56  
57  
58  
59  
60

1  
2  
3  
4  
5  
6  
7  
8  
9  
10  
11  
12  
13  
14  
15  
16  
17  
18  
19  
20  
21  
22  
23  
24  
25  
26  
27  
28  
29  
30  
31  
32  
33  
34  
35  
36  
37  
38  
39  
40  
41  
42  
43  
44  
45  
46  
47  
48  
49  
50  
51  
52  
53  
54  
55  
56  
57  
58  
59  
60

For peer review only



## Acknowledgements

We thank Veronique Laurent-Buron for her help all along the study.

We also thank all the medical students who helped the general practitioners during the study, particularly: Marie Landry, Manon Colombarini, Lucie Barrier, Céline Georges, Lucile Nart, Manon Colombarini, Pierre Lebras, Elodie Payet, Frédéric Letronnier, Anne Claire FOUCAT, Tiphane Viton, Calin Cozma, Julie Seguinot, Loriane Bonnet, Marion Denis, Claire Audouit, Guillaume Besançon, Beaupuy Jérôme, Matthieu Guilbert, Joelle Samy, Matthieu Guilbert, Anouk Boever, Cédric Grunewald, Fournier Camille, Axelle Lafortune-Michel, Marie Paulus, Solène Donval, Sarah Zadane, Maxime Even, Marie Lancelot, Teddy Marolany, Bilal Zater, Abdelmoumni Sarah, Razi Muhammed, Rabab Dini, Mmadi Benaym, Nassima Samira Chouaki, Alexandre Gillibert, Elise Brunetiere, Julien Andouard, Hadrien Payen, Marie Blois, Guillemette Boyer, Marie Conte, David Hassan, Céline Terrasse, Lucile Ruin, Rachid Setaihi, Gaëlle Schoch, Cindy Filly, Valéria Zizolfi, Marie Quantin, Marine Barbier, Hulot Guillaume, Sara Da mota Pereira, Anaïs Wagenheim, Loren Audia, Simonnet Elisa, Raissa Wanyou, Laure Patturel, Houari Kaid Ali, Marie Citounadin, Tang Vu Tuong Van, Xavier Bolla, Claire Le Lièvre de la Morinière, François Pettinotti, Agathe Edeline, Céline Duchossoir, Marianne Dufournier, Agathe Pinot, Clément Bertrand, Guillaume Rioult, Cynthia Delauneay Belleville.

1  
2  
3  
4  
5  
6  
7  
8  
9  
10  
11  
12  
13  
14  
15  
16  
17  
18  
19  
20  
21  
22  
23  
24  
25  
26  
27  
28  
29  
30  
31  
32  
33  
34  
35  
36  
37  
38  
39  
40  
41  
42  
43  
44  
45  
46



CVD patients: patients with a cardiovascular disease - MHD patients: patients with a mental health disorder

**1 Identification**

General practitioners (GPs) practising as training supervisors from 8 different French administrative regions are identified.

**2 Recruitment**

GPs who agree to participate are recruited.

**3 Randomisation**

GPs are randomised. In case several GPs work within the same practice, randomisation is forced such that all GPs from a common practice are allocated to the same group. This comes down to randomise practices. Randomisation is stratified on administrative regions.

**4 Identification**

In the COVIQuest\_CV subtrial, patients  $\geq 70$  years old with a chronic cardiovascular disease (CVD patients) are identified. In the COVIQuest\_MH subtrial, patients  $\geq 18$  years old with a mental disorder (MHD patients) are identified. Patients with both a cardiovascular disease and a mental health disorder are not eligible. GPs are not informed of their randomised allocation while identifying patients.

**5a Recruitment**

In the intervention group, GPs or their students phone to patients and ask them whether they agree to be included in the trial.

**6a Intervention delivery**

In the same phone call during which patients' consent is obtained, patients are asked 3 questions by the GP or his/her student: 1) How are you doing? 2) Would you have made an appointment with your GP if there had not been Covid 19 epidemic and lockdown? 3) Would you like an appointment with your doctor?

**7a Outcome assessment**

One month after their recruitment, patients are contacted again by their GP or his/her student, and asked whether they have been hospitalised.

**5b Recruitment**

One month after the beginning of the study, patients are contacted by their GP or his/her student, and asked whether they agree to be included in the trial.

**6b Outcome assessment**

In the same phone call during which patients' consent is obtained, patients are asked whether they have been hospitalised.

**7b Intervention delivery**

Still during the same phone call, the intervention (i.e. asking the 3 short questions) is delivered.

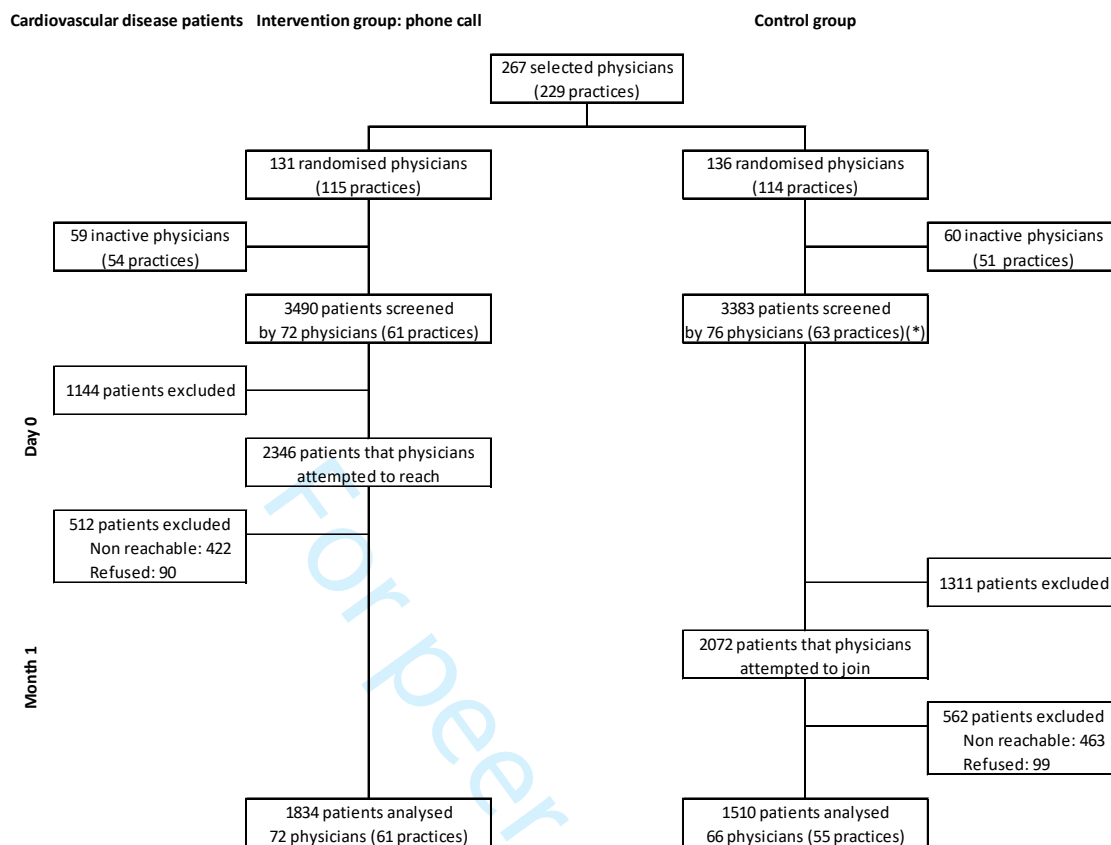

(\*) One physician (1 practice) screened patients with mental health disorders but no patient with cardiovascular disease

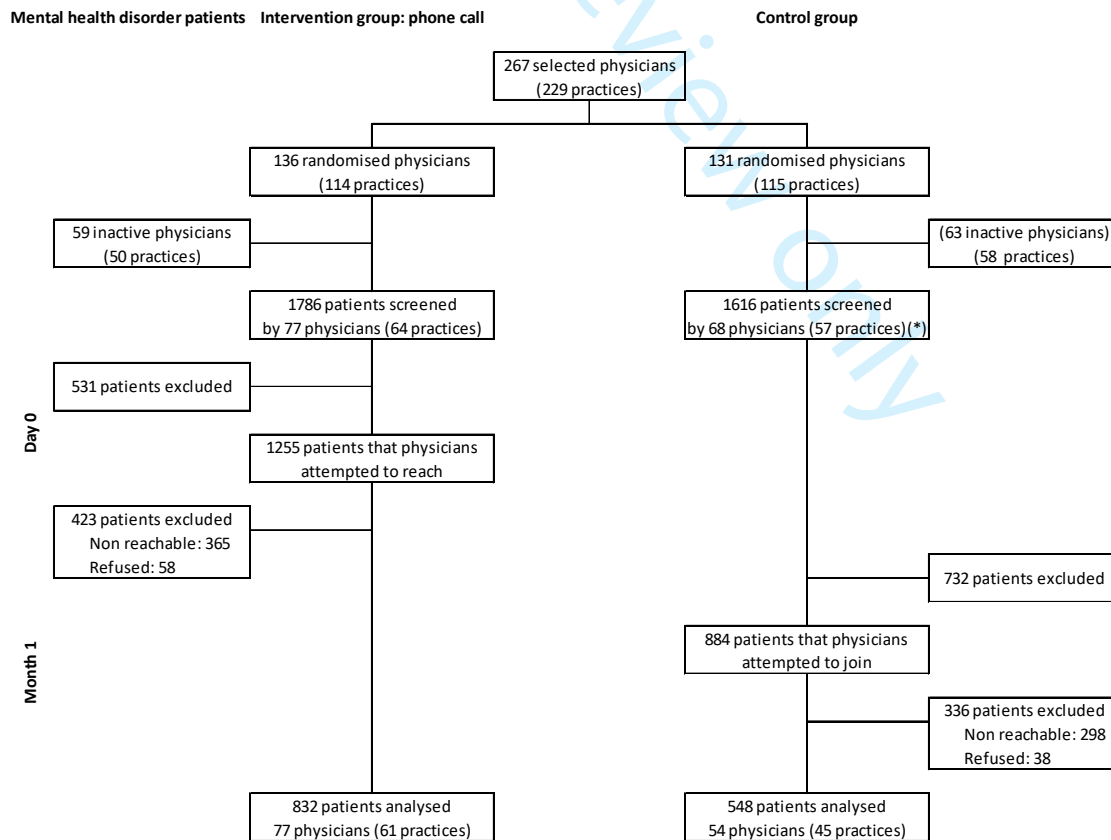

(\*) Four physicians (4 practices) screened patients with mental health disorder but no patients with cardiovascular disease

## Supplementary files

### Appendix 1. List of study sites, coordinators and general practitioners from the COVIQuest group

| Name                      | Academic general practice department | Administrative area  | General Practitioners                                                                                                                                                                                                                                                                                                                                                                                                                                                                                                                                                                                                                                                                                                                                                                                                                                                                                 |
|---------------------------|--------------------------------------|----------------------|-------------------------------------------------------------------------------------------------------------------------------------------------------------------------------------------------------------------------------------------------------------------------------------------------------------------------------------------------------------------------------------------------------------------------------------------------------------------------------------------------------------------------------------------------------------------------------------------------------------------------------------------------------------------------------------------------------------------------------------------------------------------------------------------------------------------------------------------------------------------------------------------------------|
| Ettori-Ajasse<br>Isabelle | Tours                                | Centre-Val de Loire  | SAMKO BORIS, DIBAO-DINA CLARISSE, GONZALES ANNE-MARIE, GAY-LAUNAY KARINE, MOLIMART FRANCOIS, BADEY-MEURISSE ALEXANDRA, THOMAS MARIE, PHILIPPE LAURENCE, LEROUX FARRUGIA DELPHINE, LEFEVRE RÉMI, LANG VIRGINIE, LIZE SOPHIE, DUGUE DURET MARIE-LOUISE, BAGOURD EMMANUEL, RICOIS AMÉLIE, CUVILLIER OLIVIER, DE LA PORTE DES VAUX CÉDRIC, BROUX HÉLÈNE, BACHELIER JEAN-YVES, ROBERT JEAN, BORDEAUX SAMUEL, CHALEIX LYSIANE, GABERT MARTINE, GRISON XAVIER, SIMONEAU CORINNE, PÈRE DOMINIQUE, BOURDU STÉPHANIE, DUMAS ADRIEN, LAUVERJAT FLORENCE, MAUPERTUIS QUENTIN, NOE LAGRANGE ANAIDE, TIERCIN SYLVIE, DUMOT PIERRE, AUMARECHAL ALAIN, MOLINA VALÉRIE, RIVOAL BERNARD, GROSSE JULIE, GALY VINCENT, DESRUES PATRICE, YVON-PETRAULT BLANDINE, VIEILLE ROGER, WITTKE LAURENCE, RUBE DELPHINE, BAUSSANT ALEXANDRE, MONTPERT-BOUVIER LUCIE, CONSTANT MARIE-VÉRONIQUE, TEN KET KIAN FRANÇOIS, PERRAIN ALICE |
| Sun Sophie                | Lyon                                 | Auvergne-Rhône-Alpes | JACQUIOT DENIS, MUZELLE VÉRONIQUE, PIGACHE CHRISTOPHE, LAMORT BOUCHE MARION, MANGOT CLAIRE, BENEDINI ELISE, LAVILLE AGNÈS, POTENCIER BENJAMIN, FOSSIER BENOIT, VALLE FLORIAN, FAY ISABELLE, CHAMBION PIERRE, BRYs VERONIQUE, SUN SOPHIE, BELLECOSTE VINCENT, FLORI MARIE                                                                                                                                                                                                                                                                                                                                                                                                                                                                                                                                                                                                                              |
| Jego Maeva                | Marseille                            | Occitanie            | DE TADDEO CHRISTINE, THERY DIDIER, CORDEL ANNE CATHERINE, GUERCIA OLIVIER, BARGIER JACQUES, TUDOSE IRINA, NUSSLI NICOLAS                                                                                                                                                                                                                                                                                                                                                                                                                                                                                                                                                                                                                                                                                                                                                                              |
| Motte Baptise             | Lille catholique                     | Hauts de France      | NGUYEN BRUNO, MORIN PIERRE-ETIENNE, DURAND-CHEVAL CLOTILDE, MOTTE BAPTISTE, DANCHIN FREDERIC                                                                                                                                                                                                                                                                                                                                                                                                                                                                                                                                                                                                                                                                                                                                                                                                          |

|                        |                        |                            |                                                                                                                                                                                                                                                                                                                        |
|------------------------|------------------------|----------------------------|------------------------------------------------------------------------------------------------------------------------------------------------------------------------------------------------------------------------------------------------------------------------------------------------------------------------|
| Bruel Sébastien        | Saint Etienne          | Auvergne-Rhône-Alpes       | FRUMUSELU RUXANDRA, DELEBARRE AMANDINE, FAVIE JULIEN                                                                                                                                                                                                                                                                   |
| Chiron Benoit          | Brest                  | Bretagne                   | GELINEAU THOMAS, LE GOFF DELPHINE, VERBEQUE MORVAN, MANON DARABAN TUDOR, PENIN GAELLE, LUCAS ALDRIC, LOPIN CÉLINE, FONSECA JÉROME, LE GUENNEC ANGÉLIQUE                                                                                                                                                                |
| Chambe Juliette        | Strasbourg             | Grand Est                  | GHALI-DEBUS ISABELLE, MAGINOT HÉLÈNE, ZUMSTEIN CARINE, ROOS-BERNARD SÉVERINE, RUXER SERGE, PLAUM MANUELA, GUIHENEUF CHARLINE, LENERTZ JOHN, ERNST MYRIAM, CHAMBE JULIETTE, DE CHAZELLES GRÉGOIRE, BUCHLIN FRANÇOIS, HILD PHILIPPE, VONAU PHILIPPE, DUMAS BREITWILLER CLAIRE, BERTHOU ANNE, CHARTON LÉA, LÉPINE CAMILLE |
| Sidorkiewicz Stéphanie | Paris Descartes        | Ile de France              | OLESKER SOPHIE, MALMARTEL ALEXANDRE, GHASAROSSIAN CHRISTIAN, RUSSO PATRICK, ANDERSON MARGUERITE, RICHEMOND MICHÈLE, SIDORKIEWICZ STÉPHANIE, ECOLLAN MARIE, JAURY PHILIPPE, BENAINOUS OLIVIER, MSIKA RAZON MARIE, CATU-PINAULT ANNIE                                                                                    |
| Khau Cam-Anh           | Paris Nord La Sorbonne | Ile de France              | KHAU CAM-ANH, BERKAI RANIA, MERCIER ALAIN, GRUNBERG PHILIPPE, PHAM LAN-ANH, RENAULT ALAINE, BACH LORENE, COUDERC AUDREY, CHEVALLIER FREDERIC, CHABANNES AUDREY                                                                                                                                                         |
| Bouchez Tiphane        | Nice                   | Provence-Alpes-Côte d'Azur | MELLERIN IANIS, BOUCHEZ TIPHANIE, GARSON SANDRINE, GARDON GILLES, PASCUCCI-ZAKARIAN SANDRINE, GUERVILLE VÉRONIQUE, MOUILLE BLANC CECILE, MUNCK STEPHANE, GUERVILLE MARC-ANDRÉ                                                                                                                                          |
| Ghali Maria            | Angers                 | Pays de la Loire           | JUDALET ILLAND GHISLAINE, PY THIBAUT, TESSIER CAZENEUVE CHRISTINE, RAMOND ROQUIN ALINE, GALLOT EMMANUEL, LOSSON DAUSSY GAELLE, LACOMBE ANTOINE, GABARD CATHERINE, DEVAUD BERTRAND, BUFFARD PASCAL, PLESSIS ANNE, BOURGEOIS CÉCILE                                                                                      |

**Appendix 2. List of 30 long-term illnesses (ALD 30) that are exempt from user fees**

ALD no. 1 - Invalid stroke

ALD no. 2 - Bone marrow failure and other chronic cytopenias

ALD no. 3 - Chronic arteriopathies with ischemic manifestations

ALD no. 4 - Complicated bilharziasis

ALD no. 5 - Severe heart failure, severe arrhythmia, severe valvular heart disease; Graves congenital heart disease

ALD no. 6 - Chronic active diseases of the liver and cirrhosis

ALD no. 7 - Severe primary immune deficiency, prolonged treatment, infection with human immunodeficiency virus

ALD no. 8 - Type 1 diabetes and type 2 diabetes

ALD no. 9 - Severe form of neurological and muscular disorders (including myopathy), severe epilepsy

ALD no. 10 - Hemoglobinopathies, hemolysis, chronic constitutional and acquired severe

ALD no. 11 - Hemophilia and constitutional disorders of severe hemostasis

ALD no. 12 - Severe hypertension

ALD no. 13 - Coronary disease

ALD no. 14 - Severe chronic respiratory failure

ALD no. 15 - Meadow

ALD no. 16 - Parkinson disease

ALD no. 17 - Hereditary metabolic diseases a prolonged specialized treatment

ALD no. 18 - Cystic fibrosis

ALD no. 19 - Severe chronic nephropathy and primary nephrotic syndrome

ALD no. 20 - Paraplegia

ALD no. 21 - Periarthritis nodosa, acute systemic lupus erythematosus, progressive generalized scleroderma

ALD no. 22 - Progressive rheumatoid arthritis

ALD no. 23 - Psychosis, severe personality disorder, mental retardation

ALD no. 24 - Ulcerative colitis and progressive Crohn's disease

ALD no. 25 - Multiple sclerosis

ALD no. 26 - Progressive structural scoliosis (with an angle equal to or greater than 25 degrees) until spinal maturation

ALD no. 27 - Fall from ankylosing spondylitis

1  
2  
3 ALD no. 28 - Organ transplant suites

4  
5 ALD no. 29 - Active tuberculosis

6  
7 ALD no. 30 - Malignant tumor, malignant disease of lymphatic or hematopoietic tissue.  
8  
9  
10  
11  
12  
13  
14  
15  
16  
17  
18  
19  
20  
21  
22  
23  
24  
25  
26  
27  
28  
29  
30  
31  
32  
33  
34  
35  
36  
37  
38  
39  
40  
41  
42  
43  
44  
45  
46  
47  
48  
49  
50  
51  
52  
53  
54  
55  
56  
57  
58  
59  
60

For peer review only



### Appendix 3. Interview guide

#### Information and oral consent of the patient:

I am Mr/Mrs X, a student in my Nth year of medical school at Dr Y's practice. I am calling you at the request of your GP Dr Y to ask you three short questions. The answers you give me will enable Dr Y to know how you are doing and to offer you appropriate care during lockdown if necessary. Your answers will be used anonymously in the COVIQUEST study in which Dr Y is participating. The aim of this study is to find out what impact this call has on your care. (Only for patients in the intervention group: If you agree to your answers being used in this study, you should know that you will be contacted again in 1 month time to hear from you in the same way). If you do not want your answers to be used for the study, please note that this will not affect your treatment by Dr Y. Do you accept that I ask you questions? I would like to remind you that your answers will be completely anonymous and that you can say at any time that you no longer wish your answers to be collected in the framework of COVIQUEST, without any impact on your care. If you have any questions to ask me or would like to discuss them with Dr Y, please do not hesitate.

#### Intervention:

How are you doing? (using a Likert scale of 1 = very bad to 10 = very good)

Would you have made an appointment with your GP if there had not been a lockdown related to the COVID19?

Would you like an appointment with your GP?

**Appendix 4. Baseline characteristics of general practitioners (GPs) by group\*.**

| <i>mean ± standard deviation &amp; median [Q1 ; Q3] for<br/>quantitative variables<br/>n (%) for qualitative variables</i> | <b>A</b><br>(n <sub>1</sub> = 72) | <b>B</b><br>(n <sub>2</sub> = 77) |
|----------------------------------------------------------------------------------------------------------------------------|-----------------------------------|-----------------------------------|
| Age (years)                                                                                                                | 49.9 ± 11.9<br>49.0 [38.0 ; 60.5] | 43.3 ± 10.3<br>39.0 [35.0 ; 53.0] |
| Sex: Male                                                                                                                  | 32 (44.4)                         | 30 (39.0)                         |
| Work organisation                                                                                                          |                                   |                                   |
| Practice, only physicians                                                                                                  | 39 (54.2)                         | 32 (41.6)                         |
| Alone                                                                                                                      | 5 (6.9)                           | 7 (9.1)                           |
| Practice, multidisciplinary healthcare centre                                                                              | 28 (39.0)                         | 38 (49.3)                         |
| Territorial professional health community                                                                                  | 30 (41.7)                         | 38 (49.3)                         |
| Advanced public health nurse                                                                                               | 12 (16.7)                         | 19 (24.7)                         |

\*Group A (cardiovascular disease [CVD] patients called first); group B (mental health disorder [MHD] patients called first)

## Appendix 5. COVIQuest\_CV results

**Table 1. Process evaluation of the intervention and outcome assessment**

| <i>mean ± standard deviation, median [Q1 ; Q3] &amp; {Min ; Max} for quantitative variables<br/>n (%) for qualitative variables</i> | <b>A - Intervention group - Phone call</b><br>(n <sub>1</sub> = 1834) | <b>B - Control group</b><br>(n <sub>2</sub> = 1510) |
|-------------------------------------------------------------------------------------------------------------------------------------|-----------------------------------------------------------------------|-----------------------------------------------------|
| Who phoned (intervention phone call)? - n <sub>1</sub> = 1801                                                                       |                                                                       |                                                     |
| Physician                                                                                                                           | 236 (13.1)                                                            |                                                     |
| Student                                                                                                                             | 1448 (80.4)                                                           |                                                     |
| Other person (e.g. secretary)                                                                                                       | 117 (6.5)                                                             |                                                     |
| Time between April 30th 2020 and phone call (days)                                                                                  | 11.7±8.0<br>12.0 [5.0 ; 15.0]<br>{0 ; 39}                             |                                                     |
| Time between the phone call and the outcome assessment (days) - n <sub>1</sub> = 1508                                               | 34.1±7.0<br>33.0 [29.0 ; 39.0]<br>{12 ; 58}                           |                                                     |
| Time between April 30th 2020 and the outcome assessment (days) - n <sub>1</sub> = 1508, n <sub>2</sub> = 1510                       | 45.6±8.7<br>47 [40 ; 53]<br>{26 ; 64}                                 | 48.7±7.8<br>48 [42 ; 56]<br>{26 ; 63}               |

**Table 2. Patient health status when phoned (intervention group)**

| <i>mean ± standard deviation &amp; median [Q1 ; Q3] for<br/>quantitative variables<br/>n (%) for qualitative variables</i> | <b>A - Intervention<br/>group - Phone<br/>call<br/>(n<sub>1</sub> = 1834)</b> |
|----------------------------------------------------------------------------------------------------------------------------|-------------------------------------------------------------------------------|
| Had consultations with his/her physician since the<br>beginning of the lockdown period - n <sub>1</sub> = 1825             | 851 (46.6)                                                                    |
| Number of consultations - n <sub>1</sub> = 845                                                                             | 1.5±0.9<br>1 [1 ; 2]                                                          |
| Had a contact with his/her physician since the beginning<br>of the lockdown period - n <sub>1</sub> = 1811                 | 500 (27.6)                                                                    |
| Health status perception - n <sub>1</sub> = 1820 (*)                                                                       | 7.4±1.8<br>8 [6 ; 9]                                                          |
| Would have made an appointment - n <sub>1</sub> = 1828                                                                     | 856 (46.8)                                                                    |
| Would like an appointment - n <sub>1</sub> = 1828                                                                          | 611 (33.4)                                                                    |

(\*) 0-10 Likert scale

**Table 3. Symptoms (for patients who declared they would like an appointment)**

| <i>n (%) for qualitative variables</i>    | <b>A - Intervention group - Phone call - Patients who wanted an appointment</b><br>(n = 611) |
|-------------------------------------------|----------------------------------------------------------------------------------------------|
| Number of symptoms - n <sub>1</sub> = 459 |                                                                                              |
| 1                                         | 374 (81.5)                                                                                   |
| 2                                         | 62 (13.5)                                                                                    |
| 3                                         | 23 (5.0)                                                                                     |
| Symptoms (*)                              |                                                                                              |
| General, non specific                     | 304 (53.6)                                                                                   |
| Blood system, immunology                  | 2 (0.3)                                                                                      |
| Digestive                                 | 35 (6.2)                                                                                     |
| Ocular                                    | 5 (0.9)                                                                                      |
| Ear                                       | 4 (0.7)                                                                                      |
| Cardiovascular                            | 60 (10.6)                                                                                    |
| Osteoarticular                            | 64 (11.3)                                                                                    |
| Neurological                              | 6 (1.1)                                                                                      |
| Psychological                             | 22 (3.9)                                                                                     |
| Respiratory                               | 22 (3.9)                                                                                     |
| Skin                                      | 15 (2.6)                                                                                     |
| Metabolism, nutrition                     | 11 (1.9)                                                                                     |
| Urology                                   | 8 (1.4)                                                                                      |
| Pregnancy                                 | 0                                                                                            |
| Reproductive system, female               | 2 (0.3)                                                                                      |
| Reproductive system, male                 | 0                                                                                            |
| Social                                    | 7 (1.2)                                                                                      |

(\*) One patient may have two or three symptoms

**Table 4. Patient health status when assessed**

| <i>mean ± standard deviation &amp; median [Q1 ; Q3] for quantitative variables<br/>n (%) for qualitative variables</i> | <b>A - Intervention group - Phone call</b><br>(n <sub>1</sub> = 1834) | <b>B - Control group</b><br>(n <sub>2</sub> = 1510) |
|------------------------------------------------------------------------------------------------------------------------|-----------------------------------------------------------------------|-----------------------------------------------------|
| Had COVID-19 disease - n <sub>1</sub> = 1586, n <sub>2</sub> = 1409                                                    |                                                                       |                                                     |
| Yes (TR-PCR test)                                                                                                      | 4 (0.2)                                                               | 7 (0.5)                                             |
| May-be                                                                                                                 | 72 (4.5)                                                              | 61 (4.3)                                            |
| Do not know                                                                                                            | 1510 (95.2)                                                           | 1341 (95.2)                                         |
| Health status perception - n <sub>1</sub> = 1457, n <sub>2</sub> =1488 (*)                                             | 7.4±1.8<br>8 [6 ; 9]                                                  | 7.3±1.9<br>8 [6 ; 8.5]                              |
| Had consultations with his/her physician since the beginning of the lockdown period - n <sub>2</sub> = 1417            |                                                                       | 1159 (81.8)                                         |
| Number of consultations - n <sub>2</sub> = 1155                                                                        |                                                                       | 1.9±1.3<br>1 [1 ; 2]                                |
| Had a contact with his/her physician since the beginning of the lockdown period - n <sub>2</sub> = 1454                |                                                                       | 580 (39.9)                                          |
| Would like an appointment - n <sub>2</sub> = 1500                                                                      |                                                                       | 308 (20.5)                                          |

(\*) 0-10 Likert scale

**Table 5. Causes of hospitalisations**

| <i>n (%) for qualitative variables</i>                 | <b>A - Intervention group - Phone call</b> | <b>B - Control group</b> |
|--------------------------------------------------------|--------------------------------------------|--------------------------|
| Cause of hospitalization - $n_1 = 64$ , $n_2 = 70$ (*) |                                            |                          |
| UCV: Cardiovascular emergency                          | 14 (21.9)                                  | 23 (32.9)                |
| TS: Suicide attempt                                    | 0                                          | 0                        |
| USM: Mental health emergency (except suicide attempt)  | 0                                          | 0                        |
| UAM: Other medical emergency                           | 30 (46.9)                                  | 18 (25.7)                |
| UAC: Other surgical emergency                          | 10 (15.6)                                  | 15 (21.4)                |
| PCV: Planned cardiovascular hospitalisation            | 2 (3.1)                                    | 0                        |
| PSM: Planned mental health hospitalisation             | 0                                          | 0                        |
| PAM: Planned other medical reason hospitalisation      | 1 (1.6)                                    | 7 (10.0)                 |
| PAC: Planned other surgical reason hospitalisation     | 7 (10.9)                                   | 7 (10.0)                 |

(\*) Units of analysis are hospitalisations not patients

## Appendix 6. COVIQuest\_MH results

**Table 1. Process evaluation of the intervention and outcome assessment**

| <i>mean ± standard deviation, median [Q1 ; Q3] &amp; {Min ; Max} for quantitative variables<br/>n (%) for qualitative variables</i> | <b>A - Control group</b><br>(n <sub>1</sub> = 548) | <b>B - Intervention group - Phone call</b><br>(n <sub>2</sub> = 832) |
|-------------------------------------------------------------------------------------------------------------------------------------|----------------------------------------------------|----------------------------------------------------------------------|
| Who phoned (intervention phone call)? n <sub>2</sub> = 814                                                                          |                                                    |                                                                      |
| Physician                                                                                                                           |                                                    | 85 (10.4)                                                            |
| Student                                                                                                                             |                                                    | 715 (87.8)                                                           |
| Other person (e.g. secretary)                                                                                                       |                                                    | 14 (1.7)                                                             |
| Time between April 30th 2020 and phone call (days)                                                                                  |                                                    | 10.6±7.5<br>7.0 [5.0 ; 14.0]<br>{0 ; 29}                             |
| Time between the phone call and the outcome assessment (days) - n <sub>2</sub> = 560                                                |                                                    | 37.3±9.2<br>35.0 [29.0 ; 45.5]<br>{12 ; 56}                          |
| Time between April 30th 2020 and the outcome assessment (days) - n <sub>1</sub> = 548, n <sub>2</sub> = 560                         | 48.3±9.0<br>49 [42 ; 56]<br>{20 ; 64}              | 47.3±9.3<br>48 [41 ; 55.5]<br>{14 ; 63}                              |



**Table 2. Patient health status when phoned (intervention group)**

| <i>mean ± standard deviation &amp; median [Q1 ; Q3] for<br/>quantitative variables<br/>n (%) for qualitative variables</i> | <b>B - Intervention<br/>group - Phone<br/>call<br/>(n<sub>2</sub> = 832)</b> |
|----------------------------------------------------------------------------------------------------------------------------|------------------------------------------------------------------------------|
| Had consultations with his/her physician since the<br>beginning of the lockdown period - n <sub>2</sub> = 819              | 393 (48.0)                                                                   |
| Number of consultations - n <sub>2</sub> = 392                                                                             | 2.1±1.4<br>2 [1 ; 3]                                                         |
| Had a contact with his/her physician since the beginning<br>of the lockdown period - n <sub>2</sub> = 817                  | 211 (25.8)                                                                   |
| Health status perception - n <sub>2</sub> = 819 (*)                                                                        | 6.9±2.2<br>7 [5 ; 9]                                                         |
| Would have made an appointment - n <sub>2</sub> = 826                                                                      | 401 (48.5)                                                                   |
| Would like an appointment - n <sub>2</sub> = 826                                                                           | 302 (36.6)                                                                   |

(\*) 0-10 Likert scale

**Table 3. Symptoms (for patients who declared they would like an appointment)**

| <i>n (%) for qualitative variables</i>    | <b>B- Intervention group - Phone call - Patients who wanted an appointment<br/>n=302</b> |
|-------------------------------------------|------------------------------------------------------------------------------------------|
| Number of symptoms - n <sub>2</sub> = 246 |                                                                                          |
| 1                                         | 190 (77.2)                                                                               |
| 2                                         | 41 (16.7)                                                                                |
| 3                                         | 15 (6.1)                                                                                 |
| Symptoms (*)                              |                                                                                          |
| General, non specific                     | 131 (41.3)                                                                               |
| Blood system, immunology                  | 1 (0.3)                                                                                  |
| Digestive                                 | 21 (6.6)                                                                                 |
| Ocular                                    | 2 (0.6)                                                                                  |
| Ear                                       | 1 (0.3)                                                                                  |
| Cardiovascular                            | 8 (2.5)                                                                                  |
| Osteoarticular                            | 39 (12.3)                                                                                |
| Neurological                              | 12 (3.8)                                                                                 |
| Psychological                             | 57 (18.0)                                                                                |
| Respiratory                               | 12 (3.8)                                                                                 |
| Skin                                      | 7 (2.2)                                                                                  |
| Metabolism, nutrition                     | 5 (1.6)                                                                                  |
| Urology                                   | 5 (1.6)                                                                                  |
| Pregnancy                                 | 0                                                                                        |
| Reproductive system, female               | 2 (0.6)                                                                                  |
| Reproductive system, male                 | 2 (0.6)                                                                                  |
| Social                                    | 12 (3.8)                                                                                 |

(\*) One patient may have two or three symptoms

**Table 4. Patient health status when assessed**

| <i>mean ± standard deviation &amp; median [Q1 ; Q3] for quantitative variables<br/>n (%) for qualitative variables</i> | <b>A - Control group</b><br>(n <sub>1</sub> = 548) | <b>B - Intervention group - Phone call</b><br>(n <sub>2</sub> = 832) |
|------------------------------------------------------------------------------------------------------------------------|----------------------------------------------------|----------------------------------------------------------------------|
| Had COVID-19 disease - n <sub>1</sub> = 538, n <sub>2</sub> = 584                                                      |                                                    |                                                                      |
| Yes (TR-PCR test)                                                                                                      | 5 (0.9)                                            | 0                                                                    |
| May-be                                                                                                                 | 51 (9.5)                                           | 42 (7.2)                                                             |
| Do not know                                                                                                            | 482 (89.6)                                         | 542 (92.8)                                                           |
| Health status perception - n <sub>1</sub> = 544, n <sub>2</sub> =544 (*)                                               | 7.1±2.0<br>7 [6 ; 8]                               | 7.1±2.2<br>7 [6 ; 9]                                                 |
| Had consultations with his/her physician since the beginning of the lockdown period - n <sub>1</sub> = 546             | 367 (67.2)                                         |                                                                      |
| Number of consultations - n <sub>1</sub> = 366                                                                         | 2.1±1.5<br>1 [1 ; 3]                               |                                                                      |
| Had a contact with his/her physician since the beginning of the lockdown period - n <sub>1</sub> = 534                 | 247 (46.2)                                         |                                                                      |
| Would like an appointment - n <sub>1</sub> = 542                                                                       | 158 (29.1)                                         |                                                                      |

(\*) 0-10 Likert scale

**Table 5. Causes of hospitalisations**

| <i>n (%) for qualitative variables</i>                 | <b>A - Control group</b> | <b>B - Intervention group - Phone call</b> |
|--------------------------------------------------------|--------------------------|--------------------------------------------|
| Cause of hospitalization - $n_1 = 13$ , $n_2 = 26$ (*) |                          |                                            |
| UCV: Cardiovascular emergency                          | 0                        | 0                                          |
| TS: Suicide attempt                                    | 0                        | 1 (3.8)                                    |
| USM: Mental health emergency (except suicide attempt)  | 4 (30.8)                 | 7 (26.9)                                   |
| UAM: Other medical emergency                           | 3 (23.1)                 | 10 (38.5)                                  |
| UAC: Other surgical emergency                          | 4 (30.8)                 | 4 (15.4)                                   |
| PCV: Planned cardiovascular hospitalisation            | 0                        | 0                                          |
| PSM: Planned mental health hospitalisation             | 0                        | 0                                          |
| PAM: Planned other medical reason hospitalisation      | 1 (7.7)                  | 4 (15.4)                                   |
| PAC: Planned other surgical reason hospitalisation     | 1 (7.7)                  | 0                                          |

(\*) Units of analysis are hospitalisations not patients

**Table 1: CONSORT 2010 checklist of information to include when reporting a cluster randomised trial**

| Section/Topic                    | Item No | Standard Checklist item                                                                                                                | Extension for cluster designs                                                                 | Page No *       |
|----------------------------------|---------|----------------------------------------------------------------------------------------------------------------------------------------|-----------------------------------------------------------------------------------------------|-----------------|
| <b>Title and abstract</b>        |         |                                                                                                                                        |                                                                                               |                 |
|                                  | 1a      | Identification as a randomised trial in the title                                                                                      | Identification as a cluster randomised trial in the title                                     | 1               |
|                                  | 1b      | Structured summary of trial design, methods, results, and conclusions (for specific guidance see CONSORT for abstracts) <sup>1,2</sup> | See table 2                                                                                   | 3 + See table 2 |
| <b>Introduction</b>              |         |                                                                                                                                        |                                                                                               |                 |
| <b>Background and objectives</b> | 2a      | Scientific background and explanation of rationale                                                                                     | Rationale for using a cluster design                                                          | 6-7             |
|                                  | 2b      | Specific objectives or hypotheses                                                                                                      | Whether objectives pertain to the the cluster level, the individual participant level or both | 7-8             |
| <b>Methods</b>                   |         |                                                                                                                                        |                                                                                               |                 |
| <b>Trial design</b>              | 3a      | Description of trial design (such as parallel, factorial) including allocation ratio                                                   | Definition of cluster and description of how the design features apply to the clusters        | 9               |
|                                  | 3b      | Important changes to methods after trial commencement (such as eligibility criteria), with reasons                                     |                                                                                               | /               |
| <b>Participants</b>              | 4a      | Eligibility criteria for participants                                                                                                  | Eligibility criteria for clusters                                                             | 9-10            |
|                                  | 4b      | Settings and locations where the data were collected                                                                                   |                                                                                               | <b>11-12</b>    |
| <b>Interventions</b>             | 5       | The interventions for each group with sufficient details to allow replication, including how and when they were actually administered  | Whether interventions pertain to the cluster level, the individual participant level or both  | 11-12           |

|                                         |     |                                                                                                                                                                                             |                                                                                                                                                                                                                    |               |
|-----------------------------------------|-----|---------------------------------------------------------------------------------------------------------------------------------------------------------------------------------------------|--------------------------------------------------------------------------------------------------------------------------------------------------------------------------------------------------------------------|---------------|
| <b>Outcomes</b>                         | 6a  | Completely defined pre-specified primary and secondary outcome measures, including how and when they were assessed                                                                          | Whether outcome measures pertain to the cluster level, the individual participant level or both                                                                                                                    | 12            |
|                                         | 6b  | Any changes to trial outcomes after the trial commenced, with reasons                                                                                                                       |                                                                                                                                                                                                                    | /             |
| <b>Sample size</b>                      | 7a  | How sample size was determined                                                                                                                                                              | Method of calculation, number of clusters(s) (and whether equal or unequal cluster sizes are assumed), cluster size, a coefficient of intracluster correlation (ICC or $k$ ), and an indication of its uncertainty | 13-14         |
|                                         | 7b  | When applicable, explanation of any interim analyses and stopping guidelines                                                                                                                |                                                                                                                                                                                                                    | /             |
| <b>Randomisation:</b>                   |     |                                                                                                                                                                                             |                                                                                                                                                                                                                    | 10 + protocol |
| <b>Sequence generation</b>              | 8a  | Method used to generate the random allocation sequence                                                                                                                                      |                                                                                                                                                                                                                    | <b>10</b>     |
|                                         | 8b  | Type of randomisation; details of any restriction (such as blocking and block size)                                                                                                         | Details of stratification or matching if used                                                                                                                                                                      | 10            |
| <b>Allocation concealment mechanism</b> | 9   | Mechanism used to implement the random allocation sequence (such as sequentially numbered containers), describing any steps taken to conceal the sequence until interventions were assigned | Specification that allocation was based on clusters rather than individuals and whether allocation concealment (if any) was at the cluster level, the individual participant level or both                         | 10            |
| <b>Implementation</b>                   | 10  | Who generated the random allocation sequence, who enrolled participants, and who assigned participants to interventions                                                                     | Replace by 10a, 10b and 10c                                                                                                                                                                                        | 10            |
|                                         | 10a |                                                                                                                                                                                             | Who generated the random allocation sequence, who                                                                                                                                                                  | 10            |

|                                                             |     |                                                                                                                                                                     |                                                                                                                                                           |
|-------------------------------------------------------------|-----|---------------------------------------------------------------------------------------------------------------------------------------------------------------------|-----------------------------------------------------------------------------------------------------------------------------------------------------------|
|                                                             |     | enrolled clusters, and who assigned clusters to interventions                                                                                                       |                                                                                                                                                           |
|                                                             | 10b | Mechanism by which individual participants were included in clusters for the purposes of the trial (such as complete enumeration, random sampling)                  | 10                                                                                                                                                        |
|                                                             | 10c | From whom consent was sought (representatives of the cluster, or individual cluster members, or both), and whether consent was sought before or after randomisation | 10                                                                                                                                                        |
| <b>Blinding</b>                                             |     |                                                                                                                                                                     |                                                                                                                                                           |
|                                                             | 11a | If done, who was blinded after assignment to interventions (for example, participants, care providers, those assessing outcomes) and how                            | /                                                                                                                                                         |
|                                                             | 11b | If relevant, description of the similarity of interventions                                                                                                         | 10                                                                                                                                                        |
| <b>Statistical methods</b>                                  |     |                                                                                                                                                                     |                                                                                                                                                           |
|                                                             | 12a | Statistical methods used to compare groups for primary and secondary outcomes                                                                                       | How clustering was taken into account<br>13-14                                                                                                            |
|                                                             | 12b | Methods for additional analyses, such as subgroup analyses and adjusted analyses                                                                                    | /                                                                                                                                                         |
| <b>Results</b>                                              |     |                                                                                                                                                                     |                                                                                                                                                           |
| <b>Participant flow (a diagram is strongly recommended)</b> | 13a | For each group, the numbers of participants who were randomly assigned, received intended treatment, and were analysed for the primary outcome                      | For each group, the numbers of clusters that were randomly assigned, received intended treatment, and were analysed for the primary outcome<br>15 + fig 3 |

|                                |     |                                                                                                                                                   |                                                                                                                                               |                             |
|--------------------------------|-----|---------------------------------------------------------------------------------------------------------------------------------------------------|-----------------------------------------------------------------------------------------------------------------------------------------------|-----------------------------|
|                                | 13b | For each group, losses and exclusions after randomisation, together with reasons                                                                  | For each group, losses and exclusions for both clusters and individual cluster members                                                        | Fig 3                       |
| <b>Recruitment</b>             | 14a | Dates defining the periods of recruitment and follow-up                                                                                           |                                                                                                                                               | <b>17-21 + appendix 5-6</b> |
|                                | 14b | Why the trial ended or was stopped                                                                                                                |                                                                                                                                               | /                           |
| <b>Baseline data</b>           | 15  | A table showing baseline demographic and clinical characteristics for each group                                                                  | Baseline characteristics for the individual and cluster levels as applicable for each group                                                   | 16 + table 1                |
| <b>Numbers analysed</b>        | 16  | For each group, number of participants (denominator) included in each analysis and whether the analysis was by original assigned groups           | For each group, number of clusters included in each analysis                                                                                  | 18-20 + 22-24 + fig 3       |
| <b>Outcomes and estimation</b> | 17a | For each primary and secondary outcome, results for each group, and the estimated effect size and its precision (such as 95% confidence interval) | Results at the individual or cluster level as applicable and a coefficient of intracluster correlation (ICC or $k$ ) for each primary outcome | 18-20 + 22-24               |
|                                | 17b | For binary outcomes, presentation of both absolute and relative effect sizes is recommended                                                       |                                                                                                                                               | <b>17-21</b>                |
| <b>Ancillary analyses</b>      | 18  | Results of any other analyses performed, including subgroup analyses and adjusted analyses, distinguishing pre-specified from exploratory         |                                                                                                                                               | /                           |
| <b>Harms</b>                   | 19  | All important harms or unintended effects in each group (for specific guidance see CONSORT for harms <sup>3</sup> )                               |                                                                                                                                               | /                           |
| <b>Discussion</b>              |     |                                                                                                                                                   |                                                                                                                                               |                             |
| <b>Limitations</b>             | 20  | Trial limitations, addressing sources of potential bias,                                                                                          |                                                                                                                                               | <b>25-26</b>                |



|                          |    |                                                                                                               |                                                                             |
|--------------------------|----|---------------------------------------------------------------------------------------------------------------|-----------------------------------------------------------------------------|
|                          |    | imprecision, and, if relevant, multiplicity of analyses                                                       |                                                                             |
| <b>Generalisability</b>  | 21 | Generalisability (external validity, applicability) of the trial findings                                     | Generalisability to clusters and/or individual participants (as relevant) / |
| <b>Interpretation</b>    | 22 | Interpretation consistent with results, balancing benefits and harms, and considering other relevant evidence | <b>27</b>                                                                   |
| <b>Other information</b> |    |                                                                                                               |                                                                             |
| <b>Registration</b>      | 23 | Registration number and name of trial registry                                                                | <b>4, 14</b>                                                                |
| <b>Protocol</b>          | 24 | Where the full trial protocol can be accessed, if available                                                   | /                                                                           |
| <b>Funding</b>           | 25 | Sources of funding and other support (such as supply of drugs), role of funders                               | <b>33</b>                                                                   |

\* Note: page numbers optional depending on journal requirements

**Table 2: Extension of CONSORT for abstracts<sup>1,2</sup> to reports of cluster randomised trials**

| Item                      | Standard Checklist item                                                                                     | Extension for cluster trials                                                                                   |
|---------------------------|-------------------------------------------------------------------------------------------------------------|----------------------------------------------------------------------------------------------------------------|
| <b>Title</b>              | Identification of study as randomised                                                                       | <b>Identification of study as cluster randomised</b>                                                           |
| <b>Trial design</b>       | Description of the trial design (e.g. parallel, cluster, non-inferiority)                                   |                                                                                                                |
| <b>Methods</b>            |                                                                                                             |                                                                                                                |
| <b>Participants</b>       | Eligibility criteria for participants and the settings where the data were collected                        | <b>Eligibility criteria for clusters</b>                                                                       |
| <b>Interventions</b>      | Interventions intended for each group                                                                       |                                                                                                                |
| <b>Objective</b>          | Specific objective or hypothesis                                                                            | <b>Whether objective or hypothesis pertains to the cluster level, the individual participant level or both</b> |
| <b>Outcome</b>            | Clearly defined primary outcome for this report                                                             | <b>Whether the primary outcome pertains to the cluster level, the individual participant level or both</b>     |
| <b>Randomization</b>      | How participants were allocated to interventions                                                            | <b>How clusters were allocated to interventions</b>                                                            |
| <b>Blinding (masking)</b> | Whether or not participants, care givers, and those assessing the outcomes were blinded to group assignment |                                                                                                                |
| <b>Results</b>            |                                                                                                             |                                                                                                                |
| <b>Numbers randomized</b> | Number of participants randomized to each group                                                             | <b>Number of clusters randomized to each group</b>                                                             |
| <b>Recruitment</b>        | Trial status <sup>1</sup>                                                                                   |                                                                                                                |
| <b>Numbers analysed</b>   | Number of participants analysed in each group                                                               | <b>Number of clusters analysed in each group</b>                                                               |
| <b>Outcome</b>            | For the primary outcome, a result for each group and the estimated effect size and its precision            | <b>Results at the cluster or individual participant level as applicable for each primary outcome</b>           |
| <b>Harms</b>              | Important adverse events or side effects                                                                    |                                                                                                                |
| <b>Conclusions</b>        | General interpretation of the results                                                                       |                                                                                                                |
| <b>Trial registration</b> | Registration number and name of trial register                                                              |                                                                                                                |
| <b>Funding</b>            | Source of funding                                                                                           |                                                                                                                |

<sup>1</sup> Relevant to Conference Abstracts

## REFERENCES

---

- 1 Hopewell S, Clarke M, Moher D, Wager E, Middleton P, Altman DG, et al. CONSORT for reporting randomised trials in journal and conference abstracts. *Lancet* 2008, 371:281-283
- 2 Hopewell S, Clarke M, Moher D, Wager E, Middleton P, Altman DG at al (2008) CONSORT for reporting randomized controlled trials in journal and conference abstracts: explanation and elaboration. *PLoS Med* 5(1): e20
- 3 Ioannidis JP, Evans SJ, Gotzsche PC, O'Neill RT, Altman DG, Schulz K, Moher D. Better reporting of harms in randomized trials: an extension of the CONSORT statement. *Ann Intern Med* 2004; 141(10):781-788.

For peer review only
