# Supplementary material for: Impact of a phone call with a medical student/general practitioner team on morbidity of chronic patients during the first French COVID-19 lockdown (COVIQuest): a cluster randomised trial
Source: HighWire-hosted journal article supplement (doi:10.1136/bmjopen-2021-059464), 2022-07-01
Supplement: bmjopen-2021-059464supp001_data_supplement.pdf [file bmjopen-2021-059464supp001_data_supplement.pdf]

## Supplementary files

### Appendix 1. List of study sites, coordinators and general practitioners from the COVIQuest group

| Name                      | Academic general practice department | Administrative area  | General Practitioners                                                                                                                                                                                                                                                                                                                                                                                                                                                                                                                                                                                                                                                                                                                                                                                                                                                                                 |
|---------------------------|--------------------------------------|----------------------|-------------------------------------------------------------------------------------------------------------------------------------------------------------------------------------------------------------------------------------------------------------------------------------------------------------------------------------------------------------------------------------------------------------------------------------------------------------------------------------------------------------------------------------------------------------------------------------------------------------------------------------------------------------------------------------------------------------------------------------------------------------------------------------------------------------------------------------------------------------------------------------------------------|
| Ettori-Ajasse<br>Isabelle | Tours                                | Centre-Val de Loire  | SAMKO BORIS, DIBAO-DINA CLARISSE, GONZALES ANNE-MARIE, GAY-LAUNAY KARINE, MOLIMART FRANCOIS, BADEY-MEURISSE ALEXANDRA, THOMAS MARIE, PHILIPPE LAURENCE, LEROUX FARRUGIA DELPHINE, LEFEVRE RÉMI, LANG VIRGINIE, LIZE SOPHIE, DUGUE DURET MARIE-LOUISE, BAGOURD EMMANUEL, RICOIS AMÉLIE, CUVILLIER OLIVIER, DE LA PORTE DES VAUX CÉDRIC, BROUX HÉLÈNE, BACHELIER JEAN-YVES, ROBERT JEAN, BORDEAUX SAMUEL, CHALEIX LYSIANE, GABERT MARTINE, GRISON XAVIER, SIMONEAU CORINNE, PÈRE DOMINIQUE, BOURDU STÉPHANIE, DUMAS ADRIEN, LAUVERJAT FLORENCE, MAUPERTUIS QUENTIN, NOE LAGRANGE ANAIDE, TIERCIN SYLVIE, DUMOT PIERRE, AUMARECHAL ALAIN, MOLINA VALÉRIE, RIVOAL BERNARD, GROSSE JULIE, GALY VINCENT, DESRUES PATRICE, YVON-PETRAULT BLANDINE, VIEILLE ROGER, WITTKE LAURENCE, RUBE DELPHINE, BAUSSANT ALEXANDRE, MONTPERT-BOUVIER LUCIE, CONSTANT MARIE-VÉRONIQUE, TEN KET KIAN FRANÇOIS, PERRAIN ALICE |
| Sun Sophie                | Lyon                                 | Auvergne-Rhône-Alpes | JACQUIOT DENIS, MUZELLE VÉRONIQUE, PIGACHE CHRISTOPHE, LAMORT BOUCHE MARION, MANGOT CLAIRE, BENEDINI ELISE, LAVILLE AGNÈS, POTENCIER BENJAMIN, FOSSIER BENOIT, VALLE FLORIAN, FAY ISABELLE, CHAMBION PIERRE, BRYs VERONIQUE, SUN SOPHIE, BELLECOSTE VINCENT, FLORI MARIE                                                                                                                                                                                                                                                                                                                                                                                                                                                                                                                                                                                                                              |
| Jego Maeva                | Marseille                            | Occitanie            | DE TADDEO CHRISTINE, THERY DIDIER, CORDEL ANNE CATHERINE, GUERCIA OLIVIER, BARGIER JACQUES, TUDOSE IRINA, NUSSLI NICOLAS                                                                                                                                                                                                                                                                                                                                                                                                                                                                                                                                                                                                                                                                                                                                                                              |
| Motte Baptise             | Lille catholique                     | Hauts de France      | NGUYEN BRUNO, MORIN PIERRE-ETIENNE, DURAND-CHEVAL CLOTILDE, MOTTE BAPTISTE, DANCHIN FREDERIC                                                                                                                                                                                                                                                                                                                                                                                                                                                                                                                                                                                                                                                                                                                                                                                                          |

|                        |                        |                            |                                                                                                                                                                                                                                                                                                                        |
|------------------------|------------------------|----------------------------|------------------------------------------------------------------------------------------------------------------------------------------------------------------------------------------------------------------------------------------------------------------------------------------------------------------------|
| Bruel Sébastien        | Saint Etienne          | Auvergne-Rhône-Alpes       | FRUMUSELU RUXANDRA, DELEBARRE AMANDINE, FAVIE JULIEN                                                                                                                                                                                                                                                                   |
| Chiron Benoit          | Brest                  | Bretagne                   | GELINEAU THOMAS, LE GOFF DELPHINE, VERBEQUE MORVAN, MANON DARABAN TUDOR, PENIN GAELLE, LUCAS ALDRIC, LOPIN CÉLINE, FONSECA JÉRÔME, LE GUENNEC ANGÉLIQUE                                                                                                                                                                |
| Chambe Juliette        | Strasbourg             | Grand Est                  | GHALI-DEBUS ISABELLE, MAGINOT HÉLÈNE, ZUMSTEIN CARINE, ROOS-BERNARD SÉVERINE, RUXER SERGE, PLAUM MANUELA, GUIHENEUF CHARLINE, LENERTZ JOHN, ERNST MYRIAM, CHAMBE JULIETTE, DE CHAZELLES GRÉGOIRE, BUCHLIN FRANÇOIS, HILD PHILIPPE, VONAU PHILIPPE, DUMAS BREITWILLER CLAIRE, BERTHOU ANNE, CHARTON LÉA, LÉPINE CAMILLE |
| Sidorkiewicz Stéphanie | Paris Descartes        | Ile de France              | OLESKER SOPHIE, MALMARTEL ALEXANDRE, GHASAROSSIAN CHRISTIAN, RUSSO PATRICK, ANDERSON MARGUERITE, RICHEMOND MICHÈLE, SIDORKIEWICZ STÉPHANIE, ECOLLAN MARIE, JAURY PHILIPPE, BENAINOUS OLIVIER, MSIKA RAZON MARIE, CATU-PINAULT ANNIE                                                                                    |
| Khau Cam-Anh           | Paris Nord La Sorbonne | Ile de France              | KHAU CAM-ANH, BERKAI RANIA, MERCIER ALAIN, GRUNBERG PHILIPPE, PHAM LAN-ANH, RENAULT ALAINE, BACH LORENE, COUDERC AUDREY, CHEVALLIER FREDERIC, CHABANNES AUDREY                                                                                                                                                         |
| Bouchez Tiphanie       | Nice                   | Provence-Alpes-Côte d'Azur | MELLERIN IANIS, BOUCHEZ TIPHANIE, GARSON SANDRINE, GARDON GILLES, PASCUCCI-ZAKARIAN SANDRINE, GUERVILLE VÉRONIQUE, MOUILLE BLANC CECILE, MUNCK STEPHANE, GUERVILLE MARC-ANDRÉ                                                                                                                                          |
| Ghali Maria            | Angers                 | Pays de la Loire           | JUDALET ILLAND GHISLAINE, PY THIBAUT, TESSIER CAZENEUVE CHRISTINE, RAMOND ROQUIN ALINE, GALLOT EMMANUEL, LOSSON DAUSSY GAELLE, LACOMBE ANTOINE, GABARD CATHERINE, DEVAUD BERTRAND, BUFFARD PASCAL, PLESSIS ANNE, BOURGEOIS CÉCILE                                                                                      |

**Appendix 2. List of 30 long-term illnesses (ALD 30) that are exempt from user fees**

ALD no. 1 - Invalid stroke

ALD no. 2 - Bone marrow failure and other chronic cytopenias

ALD no. 3 - Chronic arteriopathies with ischemic manifestations

ALD no. 4 - Complicated bilharziasis

ALD no. 5 - Severe heart failure, severe arrhythmia, severe valvular heart disease; Graves congenital heart disease

ALD no. 6 - Chronic active diseases of the liver and cirrhosis

ALD no. 7 - Severe primary immune deficiency, prolonged treatment, infection with human immunodeficiency virus

ALD no. 8 - Type 1 diabetes and type 2 diabetes

ALD no. 9 - Severe form of neurological and muscular disorders (including myopathy), severe epilepsy

ALD no. 10 - Hemoglobinopathies, hemolysis, chronic constitutional and acquired severe

ALD no. 11 - Hemophilia and constitutional disorders of severe hemostasis

ALD no. 12 - Severe hypertension

ALD no. 13 - Coronary disease

ALD no. 14 - Severe chronic respiratory failure

ALD no. 15 - Meadow

ALD no. 16 - Parkinson disease

ALD no. 17 - Hereditary metabolic diseases a prolonged specialized treatment

ALD no. 18 - Cystic fibrosis

ALD no. 19 - Severe chronic nephropathy and primary nephrotic syndrome

ALD no. 20 - Paraplegia

ALD no. 21 - Periarthritis nodosa, acute systemic lupus erythematosus, progressive generalized scleroderma

ALD no. 22 - Progressive rheumatoid arthritis

ALD no. 23 - Psychosis, severe personality disorder, mental retardation

ALD no. 24 - Ulcerative colitis and progressive Crohn's disease

ALD no. 25 - Multiple sclerosis

ALD no. 26 - Progressive structural scoliosis (with an angle equal to or greater than 25 degrees) until spinal maturation

ALD no. 27 - Fall from ankylosing spondylitis

ALD no. 28 - Organ transplant suites

ALD no. 29 - Active tuberculosis

ALD no. 30 - Malignant tumor, malignant disease of lymphatic or hematopoietic tissue.

### Appendix 3. Interview guide

Information and oral consent of the patient:

I am Mr/Mrs X, a student in my Nth year of medical school at Dr Y's practice. I am calling you at the request of your GP Dr Y to ask you three short questions. The answers you give me will enable Dr Y to know how you are doing and to offer you appropriate care during lockdown if necessary. Your answers will be used anonymously in the COVIQUEST study in which Dr Y is participating. The aim of this study is to find out what impact this call has on your care. (Only for patients in the intervention group: If you agree to your answers being used in this study, you should know that you will be contacted again in 1 month time to hear from you in the same way). If you do not want your answers to be used for the study, please note that this will not affect your treatment by Dr Y. Do you accept that I ask you questions? I would like to remind you that your answers will be completely anonymous and that you can say at any time that you no longer wish your answers to be collected in the framework of COVIQUEST, without any impact on your care. If you have any questions to ask me or would like to discuss them with Dr Y, please do not hesitate.

Intervention:

How are you doing? (using a Likert scale of 1 = very bad to 10 = very good)

Would you have made an appointment with your GP if there had not been a lockdown related to the COVID19?

Would you like an appointment with your GP?

**Appendix 4. Baseline characteristics of general practitioners (GPs) by group\*.**

| <i>mean ± standard deviation &amp; median [Q1 ; Q3] for<br/>quantitative variables<br/>n (%) for qualitative variables</i> | <b>A</b><br>(n <sub>1</sub> = 72) | <b>B</b><br>(n <sub>2</sub> = 77) |
|----------------------------------------------------------------------------------------------------------------------------|-----------------------------------|-----------------------------------|
| Age (years)                                                                                                                | 49.9 ± 11.9<br>49.0 [38.0 ; 60.5] | 43.3 ± 10.3<br>39.0 [35.0 ; 53.0] |
| Sex: Male                                                                                                                  | 32 (44.4)                         | 30 (39.0)                         |
| Work organisation                                                                                                          |                                   |                                   |
| Practice, only physicians                                                                                                  | 39 (54.2)                         | 32 (41.6)                         |
| Alone                                                                                                                      | 5 (6.9)                           | 7 (9.1)                           |
| Practice, multidisciplinary healthcare centre                                                                              | 28 (39.0)                         | 38 (49.3)                         |
| Territorial professional health community                                                                                  | 30 (41.7)                         | 38 (49.3)                         |
| <u>Advanced public health nurse</u>                                                                                        | <u>12 (16.7)</u>                  | <u>19 (24.7)</u>                  |

\*Group A (cardiovascular disease [CVD] patients called first); group B (mental health disorder [MHD] patients called first)

## Appendix 5. COVIQuest\_CV results

Table 1. Process evaluation of the intervention and outcome assessment

| <i>mean ± standard deviation, median [Q1 ; Q3] &amp; {Min ; Max} for quantitative variables<br/>n (%) for qualitative variables</i> | <b>A - Intervention group - Phone call</b><br>(n <sub>1</sub> = 1834) | <b>B - Control group</b><br>(n <sub>2</sub> = 1510) |
|-------------------------------------------------------------------------------------------------------------------------------------|-----------------------------------------------------------------------|-----------------------------------------------------|
| Who phoned (intervention phone call)? - n <sub>1</sub> = 1801                                                                       |                                                                       |                                                     |
| Physician                                                                                                                           | 236 (13.1)                                                            |                                                     |
| Student                                                                                                                             | 1448 (80.4)                                                           |                                                     |
| Other person (e.g. secretary)                                                                                                       | 117 (6.5)                                                             |                                                     |
| Time between April 30th 2020 and phone call (days)                                                                                  | 11.7±8.0<br>12.0 [5.0 ; 15.0]<br>{0 ; 39}                             |                                                     |
| Time between the phone call and the outcome assessment (days) - n <sub>1</sub> = 1508                                               | 34.1±7.0<br>33.0 [29.0 ; 39.0]<br>{12 ; 58}                           |                                                     |
| Time between April 30th 2020 and the outcome assessment (days) - n <sub>1</sub> = 1508, n <sub>2</sub> = 1510                       | 45.6±8.7<br>47 [40 ; 53]<br>{26 ; 64}                                 | 48.7±7.8<br>48 [42 ; 56]<br>{26 ; 63}               |

**Table 2. Patient health status when phoned (intervention group)**

| <i>mean ± standard deviation &amp; median [Q1 ; Q3] for quantitative variables<br/>n (%) for qualitative variables</i> | <b>A - Intervention group - Phone call</b><br>(n <sub>1</sub> = 1834) |
|------------------------------------------------------------------------------------------------------------------------|-----------------------------------------------------------------------|
| Had consultations with his/her physician since the beginning of the lockdown period - n <sub>1</sub> = 1825            | 851 (46.6)                                                            |
| Number of consultations - n <sub>1</sub> = 845                                                                         | 1.5±0.9<br>1 [1 ; 2]                                                  |
| Had a contact with his/her physician since the beginning of the lockdown period - n <sub>1</sub> = 1811                | 500 (27.6)                                                            |
| Health status perception - n <sub>1</sub> = 1820 (*)                                                                   | 7.4±1.8<br>8 [6 ; 9]                                                  |
| Would have made an appointment - n <sub>1</sub> = 1828                                                                 | 856 (46.8)                                                            |
| Would like an appointment - n <sub>1</sub> = 1828                                                                      | 611 (33.4)                                                            |

(\*) 0-10 Likert scale



**Table 3. Symptoms (for patients who declared they would like an appointment)**

| <i>n (%) for qualitative variables</i>    | <b>A - Intervention group - Phone call - Patients who wanted an appointment<br/>(n = 611)</b> |
|-------------------------------------------|-----------------------------------------------------------------------------------------------|
| Number of symptoms - n <sub>1</sub> = 459 |                                                                                               |
| 1                                         | 374 (81.5)                                                                                    |
| 2                                         | 62 (13.5)                                                                                     |
| 3                                         | 23 (5.0)                                                                                      |
| Symptoms (*)                              |                                                                                               |
| General, non specific                     | 304 (53.6)                                                                                    |
| Blood system, immunology                  | 2 (0.3)                                                                                       |
| Digestive                                 | 35 (6.2)                                                                                      |
| Ocular                                    | 5 (0.9)                                                                                       |
| Ear                                       | 4 (0.7)                                                                                       |
| Cardiovascular                            | 60 (10.6)                                                                                     |
| Osteoarticular                            | 64 (11.3)                                                                                     |
| Neurological                              | 6 (1.1)                                                                                       |
| Psychological                             | 22 (3.9)                                                                                      |
| Respiratory                               | 22 (3.9)                                                                                      |
| Skin                                      | 15 (2.6)                                                                                      |
| Metabolism, nutrition                     | 11 (1.9)                                                                                      |
| Urology                                   | 8 (1.4)                                                                                       |
| Pregnancy                                 | 0                                                                                             |
| Reproductive system, female               | 2 (0.3)                                                                                       |
| Reproductive system, male                 | 0                                                                                             |
| Social                                    | 7 (1.2)                                                                                       |

(\*) One patient may have two or three symptoms

**Table 4. Patient health status when assessed**

| <i>mean ± standard deviation &amp; median [Q1 ; Q3] for quantitative variables<br/>n (%) for qualitative variables</i> | <b>A - Intervention group - Phone call</b><br>(n <sub>1</sub> = 1834) | <b>B - Control group</b><br>(n <sub>2</sub> = 1510) |
|------------------------------------------------------------------------------------------------------------------------|-----------------------------------------------------------------------|-----------------------------------------------------|
| Had COVID-19 disease - n <sub>1</sub> = 1586, n <sub>2</sub> = 1409                                                    |                                                                       |                                                     |
| Yes (TR-PCR test)                                                                                                      | 4 (0.2)                                                               | 7 (0.5)                                             |
| May-be                                                                                                                 | 72 (4.5)                                                              | 61 (4.3)                                            |
| Do not know                                                                                                            | 1510 (95.2)                                                           | 1341 (95.2)                                         |
| Health status perception - n <sub>1</sub> = 1457, n <sub>2</sub> =1488 (*)                                             | 7.4±1.8<br>8 [6 ; 9]                                                  | 7.3±1.9<br>8 [6 ; 8.5]                              |
| Had consultations with his/her physician since the beginning of the lockdown period - n <sub>2</sub> = 1417            |                                                                       | 1159 (81.8)                                         |
| Number of consultations - n <sub>2</sub> = 1155                                                                        |                                                                       | 1.9±1.3<br>1 [1 ; 2]                                |
| Had a contact with his/her physician since the beginning of the lockdown period - n <sub>2</sub> = 1454                |                                                                       | 580 (39.9)                                          |
| Would like an appointment - n <sub>2</sub> = 1500                                                                      |                                                                       | 308 (20.5)                                          |

(\*) 0-10 Likert scale

**Table 5. Causes of hospitalisations**

| <i>n (%) for qualitative variables</i>                | <b>A - Intervention group - Phone call</b> | <b>B - Control group</b> |
|-------------------------------------------------------|--------------------------------------------|--------------------------|
| Cause of hospitalization - $n_1 = 64, n_2 = 70$ (*)   |                                            |                          |
| UCV: Cardiovascular emergency                         | 14 (21.9)                                  | 23 (32.9)                |
| TS: Suicide attempt                                   | 0                                          | 0                        |
| USM: Mental health emergency (except suicide attempt) | 0                                          | 0                        |
| UAM: Other medical emergency                          | 30 (46.9)                                  | 18 (25.7)                |
| UAC: Other surgical emergency                         | 10 (15.6)                                  | 15 (21.4)                |
| PCV: Planned cardiovascular hospitalisation           | 2 (3.1)                                    | 0                        |
| PSM: Planned mental health hospitalisation            | 0                                          | 0                        |
| PAM: Planned other medical reason hospitalisation     | 1 (1.6)                                    | 7 (10.0)                 |
| PAC: Planned other surgical reason hospitalisation    | 7 (10.9)                                   | 7 (10.0)                 |

(\*) Units of analysis are hospitalisations not patients

## Appendix 6. COVIQuest\_MH results

Table 1. Process evaluation of the intervention and outcome assessment

| <i>mean ± standard deviation, median [Q1 ; Q3] &amp; {Min ; Max} for quantitative variables<br/>n (%) for qualitative variables</i> | <b>A - Control group</b><br>(n <sub>1</sub> = 548) | <b>B - Intervention group - Phone call</b><br>(n <sub>2</sub> = 832) |
|-------------------------------------------------------------------------------------------------------------------------------------|----------------------------------------------------|----------------------------------------------------------------------|
| Who phoned (intervention phone call)? n <sub>2</sub> = 814                                                                          |                                                    |                                                                      |
| Physician                                                                                                                           |                                                    | 85 (10.4)                                                            |
| Student                                                                                                                             |                                                    | 715 (87.8)                                                           |
| Other person (e.g. secretary)                                                                                                       |                                                    | 14 (1.7)                                                             |
| Time between April 30th 2020 and phone call (days)                                                                                  |                                                    | 10.6±7.5<br>7.0 [5.0 ; 14.0]<br>{0 ; 29}                             |
| Time between the phone call and the outcome assessment (days) - n <sub>2</sub> = 560                                                |                                                    | 37.3±9.2<br>35.0 [29.0 ; 45.5]<br>{12 ; 56}                          |
| Time between April 30th 2020 and the outcome assessment (days) - n <sub>1</sub> = 548, n <sub>2</sub> = 560                         | 48.3±9.0<br>49 [42 ; 56]<br>{20 ; 64}              | 47.3±9.3<br>48 [41 ; 55.5]<br>{14 ; 63}                              |

**Table 2. Patient health status when phoned (intervention group)**

| <i>mean ± standard deviation &amp; median [Q1 ; Q3] for quantitative variables<br/>n (%) for qualitative variables</i> | <b>B - Intervention group - Phone call</b><br>(n <sub>2</sub> = 832) |
|------------------------------------------------------------------------------------------------------------------------|----------------------------------------------------------------------|
| Had consultations with his/her physician since the beginning of the lockdown period - n <sub>2</sub> = 819             | 393 (48.0)                                                           |
| Number of consultations - n <sub>2</sub> = 392                                                                         | 2.1±1.4<br>2 [1 ; 3]                                                 |
| Had a contact with his/her physician since the beginning of the lockdown period - n <sub>2</sub> = 817                 | 211 (25.8)                                                           |
| Health status perception - n <sub>2</sub> = 819 (*)                                                                    | 6.9±2.2<br>7 [5 ; 9]                                                 |
| Would have made an appointment - n <sub>2</sub> = 826                                                                  | 401 (48.5)                                                           |
| Would like an appointment - n <sub>2</sub> = 826                                                                       | 302 (36.6)                                                           |

(\*) 0-10 Likert scale

**Table 3. Symptoms (for patients who declared they would like an appointment)**

| <i>n (%) for qualitative variables</i>    | <b>B- Intervention group - Phone call - Patients who wanted an appointment<br/>n=302</b> |
|-------------------------------------------|------------------------------------------------------------------------------------------|
| Number of symptoms - n <sub>2</sub> = 246 |                                                                                          |
| 1                                         | 190 (77.2)                                                                               |
| 2                                         | 41 (16.7)                                                                                |
| 3                                         | 15 (6.1)                                                                                 |
| Symptoms (*)                              |                                                                                          |
| General, non specific                     | 131 (41.3)                                                                               |
| Blood system, immunology                  | 1 (0.3)                                                                                  |
| Digestive                                 | 21 (6.6)                                                                                 |
| Ocular                                    | 2 (0.6)                                                                                  |
| Ear                                       | 1 (0.3)                                                                                  |
| Cardiovascular                            | 8 (2.5)                                                                                  |
| Osteoarticular                            | 39 (12.3)                                                                                |
| Neurological                              | 12 (3.8)                                                                                 |
| Psychological                             | 57 (18.0)                                                                                |
| Respiratory                               | 12 (3.8)                                                                                 |
| Skin                                      | 7 (2.2)                                                                                  |
| Metabolism, nutrition                     | 5 (1.6)                                                                                  |
| Urology                                   | 5 (1.6)                                                                                  |
| Pregnancy                                 | 0                                                                                        |
| Reproductive system, female               | 2 (0.6)                                                                                  |
| Reproductive system, male                 | 2 (0.6)                                                                                  |
| Social                                    | 12 (3.8)                                                                                 |

(\*) One patient may have two or three symptoms

**Table 4. Patient health status when assessed**

| <i>mean ± standard deviation &amp; median [Q1 ; Q3] for quantitative variables<br/>n (%) for qualitative variables</i> | <b>A - Control group</b><br>(n <sub>1</sub> = 548) | <b>B - Intervention group - Phone call</b><br>(n <sub>2</sub> = 832) |
|------------------------------------------------------------------------------------------------------------------------|----------------------------------------------------|----------------------------------------------------------------------|
| Had COVID-19 disease - n <sub>1</sub> = 538, n <sub>2</sub> = 584                                                      |                                                    |                                                                      |
| Yes (TR-PCR test)                                                                                                      | 5 (0.9)                                            | 0                                                                    |
| May-be                                                                                                                 | 51 (9.5)                                           | 42 (7.2)                                                             |
| Do not know                                                                                                            | 482 (89.6)                                         | 542 (92.8)                                                           |
| Health status perception - n <sub>1</sub> = 544, n <sub>2</sub> =544 (*)                                               | 7.1±2.0<br>7 [6 ; 8]                               | 7.1±2.2<br>7 [6 ; 9]                                                 |
| Had consultations with his/her physician since the beginning of the lockdown period - n <sub>1</sub> = 546             | 367 (67.2)                                         |                                                                      |
| Number of consultations - n <sub>1</sub> = 366                                                                         | 2.1±1.5<br>1 [1 ; 3]                               |                                                                      |
| Had a contact with his/her physician since the beginning of the lockdown period - n <sub>1</sub> = 534                 | 247 (46.2)                                         |                                                                      |
| Would like an appointment - n <sub>1</sub> = 542                                                                       | 158 (29.1)                                         |                                                                      |

(\*) 0-10 Likert scale

**Table 5. Causes of hospitalisations**

| <i>n (%) for qualitative variables</i>                 | <b>A - Control group</b> | <b>B - Intervention group - Phone call</b> |
|--------------------------------------------------------|--------------------------|--------------------------------------------|
| Cause of hospitalization - $n_1 = 13$ , $n_2 = 26$ (*) |                          |                                            |
| UCV: Cardiovascular emergency                          | 0                        | 0                                          |
| TS: Suicide attempt                                    | 0                        | 1 (3.8)                                    |
| USM: Mental health emergency (except suicide attempt)  | 4 (30.8)                 | 7 (26.9)                                   |
| UAM: Other medical emergency                           | 3 (23.1)                 | 10 (38.5)                                  |
| UAC: Other surgical emergency                          | 4 (30.8)                 | 4 (15.4)                                   |
| PCV: Planned cardiovascular hospitalisation            | 0                        | 0                                          |
| PSM: Planned mental health hospitalisation             | 0                        | 0                                          |
| PAM: Planned other medical reason hospitalisation      | 1 (7.7)                  | 4 (15.4)                                   |
| PAC: Planned other surgical reason hospitalisation     | 1 (7.7)                  | 0                                          |

(\*) Units of analysis are hospitalisations not patients
